1 Reshaping of the *Arabidopsis thaliana* proteome landscape and  
2 co-regulation of proteins in development and immunity

3

4

5 *Mona Bassal, Petra Majovsky, Domenika Thieme, Tobias Herr, Mohammad Abukhalaf,*  
6 *Mohamed Ayash, MHD Rami Al Shweiki, Carsten Proksch, Ali Hmedat, Jörg Ziegler,*  
7 *Steffan Neumann and Wolfgang Hoehenwarter*

8

9 Leibniz Institute of Plant Biochemistry, Weinberg 3, Halle/Saale D-06120, Germany

10

11 Keywords: Arabidopsis, deep proteomics, protein co-expression. proteome,  
12 senescence, ribosome, seed proteome, photosynthesis, plant immunity, jasmonate

13

14 Address correspondence to

15 Wolfgang Hoehenwarter

16 Proteome Biology of Plant Interactions Research Group

17 Leibniz Institute of Plant Biochemistry

18 Email: [wolfgang.hoehenwarter@ipb-halle.de](mailto:wolfgang.hoehenwarter@ipb-halle.de)

19

20

21

22

23

24 Abstract

25 Proteome remodeling is a fundamental adaptive response and proteins in complex and  
26 functionally related proteins are often co-expressed. Using a deep sampling strategy we  
27 define *Arabidopsis thaliana* tissue core proteomes at around 10,000 proteins per tissue  
28 and absolutely quantify (copy numbers per cell) nearly 16,000 proteins throughout the  
29 plant lifecycle. A proteome wide survey of global post translational modification revealed  
30 amino acid exchanges pointing to potential conservation of translational infidelity in  
31 eukaryotes. Correlation analysis of protein abundance uncovered potentially new tissue  
32 and age specific roles of entire signaling modules regulating transcription in  
33 photosynthesis, seed development and senescence and abscission. Among others, the  
34 data suggest a potential function of RD26 and other NAC transcription factors in seed  
35 development related to desiccation tolerance as well as a possible function of Cysteine-  
36 rich Receptor-like Kinases (CRKs) as ROS sensors in senescence. All of the  
37 components of ribosome biogenesis factor (RBF) complexes were co-expressed tissue  
38 and age specifically indicating functional promiscuity in the assembly of these little  
39 described protein complexes in *Arabidopsis*. Treatment of seedlings with flg22 for 16  
40 hours allowed us to characterize proteome architecture in basal immunity in detail. The  
41 results were complemented with parallel reaction monitoring (PRM) targeted  
42 proteomics, phytohormone, amino acid and transcript measurements. We obtained  
43 strong evidence of suppression of jasmonate (JA) and JA-Ile levels by deconjugation  
44 and hydroxylation via IAA-ALA RESISTANT3 (IAR3) and JASMONATE-INDUCED  
45 OXYGENASE 2 (JOX2) under the control of JASMONATE INSENSITIVE 1 (MYC2).  
46 This previously unknown regulatory switch is another part of the puzzle of the as yet  
47 understudied role of JA in pattern triggered immunity. The extensive coverage of the  
48 *Arabidopsis* proteome in various biological scenarios presents a rich resource to plant  
49 biologists that we make available to the community.

50

51

52

## 53 Introduction

54 Proteome biology is receiving increasing interest in the last years but still proves difficult  
55 on a genome wide scale in plants. The proteome is the most fundamental active  
56 determinant of an organism's phenotype and its landscape is large, complex and  
57 dynamic, entailing changes in protein abundance, interaction, post translational  
58 modification (PTM) and sub-cellular localization.

59 Steady state protein abundance at a certain time point is to a considerable part  
60 determined by the abundance of its transcript and the latter's translation rate. Synthesis  
61 is however only half of the equation governing protein abundance, indeed *Arabidopsis*  
62 has more than 600 F-box proteins as components of diverse E3 ubiquitin ligase  
63 complexes that direct protein degradation. Newer evidence has shown that post  
64 transcriptional and translational mechanisms (Ponnala et al., 2014; Merchante et al.,  
65 2017) and phenomena such as cell-to cell mobile mRNAs (Thieme et al., 2015) and  
66 proteins (Han et al., 2014; Guan et al., 2017) play equally important roles in determining  
67 the proteome's temporal and spatial plasticity foremost in steady state shifts. Therefore,  
68 despite the continued practice of quantifying the abundance of proteins' cognate  
69 transcripts to estimate and quantify functional protein coding gene expression, direct,  
70 large scale measurement of protein abundance and PTM should be the explicit end  
71 point of functional genomics.

72 The problem with this is that proteomics has long been beset by a lack of sensitivity,  
73 especially in plants. Indeed, only a handful of true deep proteomics studies in this  
74 kingdom can be found. Walley and co-workers constructed a protein co-expression  
75 network based on measurement of 17,862 proteins and 6,227 phosphorylated proteins  
76 in maize (Walley et al., 2016). The tissue and development specific wheat proteome has  
77 been mapped with measurement of 15,779 proteins (Duncan et al., 2017) as well as the  
78 tomato fruit where 7,738 proteins were measured in one or more developmental stages  
79 (Szymanski et al., 2017). Song and co-workers reported optimized FASP sample  
80 preparation in conjunction with 2D-LC-MS/MS allowed measurement of 11,690 proteins  
81 from a single *Arabidopsis* leaf sample (Song et al., 2018) and Baerenfaller and co-

82 workers reported measurement of nearly 15,000 *Arabidopsis* proteins more than ten  
83 years ago (Baerenfaller et al., 2008).

84 Here we go beyond this classic study and elucidate *Arabidopsis thaliana* tissue specific  
85 proteome remodeling in development and immunity in unprecedented resolution and  
86 detail. We describe a procedure that allows deep sampling of up to 9,000 proteins per  
87 plant sample and does not require the expertise necessary for 2D-LC-MS. We  
88 quantified nearly 16,000 proteins in absolute terms (copy number per cell) and  
89 conducted a global analysis of protein PTM.

90 A long standing caveat in proteomics is proteomics “dark matter” (Skinner and Kelleher,  
91 2015) meaning an abundance of high quality MS2 spectra that do not result in PSM.  
92 Many of these MS2 spectra are derived from peptides bearing PTM, however classic  
93 search algorithms necessitate PTM predefinition, limiting potential PTM identification to  
94 a handful. Recent years have seen the advent of “open search” algorithms (Chick et al.,  
95 2015; Kong et al., 2017; Bagwan et al., 2018; Chi et al., 2018) that allow unrestricted  
96 precursor mass shifts in PSM, and so have the potential to identify the vast array of  
97 biologically occurring modifications on a proteome wide scale. Here we performed such  
98 a survey using the MSFragger (Kong et al., 2017) software suite in *Arabidopsis*.

99 Large scale protein co-expression analysis is a potentially powerful strategy to  
100 determine functional relationships between proteins because it circumvents the  
101 limitations inherent to transcriptomics measurements described above. We applied  
102 clustering algorithms to our data set that provides extensive coverage of the  
103 *Arabidopsis* proteome to uncover tissue and developmentally specific protein  
104 expression patterns. The approach was effective in pinpointing co-regulation of all  
105 components of protein complexes and developmentally timed signaling modules. More  
106 importantly, it then allowed inference of previously unknown functions of proteins,  
107 protein families and entire signaling modules based on the same expression patterns.  
108 This included processes such as tissue and age specific ribosome biogenesis,  
109 photosynthesis, ABA signaling and NAC transcription factors in seed development and  
110 establishment of dormancy and senescence and abscission.

111 The various sequential steps of ribosome biogenesis including the involved RPs and  
112 RBFs are well described in yeast and human (Henras et al., 2008; Henras et al., 2015).  
113 Mutations in numerous RPs and RBFs are known to cause severe developmental  
114 defects, so called ribosomopathies in humans. This also holds true in *Arabidopsis*  
115 where a number of mutations in RBFs affect gametophyte development and  
116 embryogenesis (Byrne, 2009; Weis et al., 2015). Furthermore *Arabidopsis* ribosomes  
117 are extensively heterogenic, each individual RP being encoded by two to seven  
118 paralogs (Weis et al., 2015). This heterogeneity of ribosome species is dependent on  
119 developmental stage, tissue and environmental stimuli, suggesting that the specific  
120 ribosome constituency may play a regulatory role in these processes.

121 Cotyledons of young seedlings are characterized by light induced chloroplast  
122 biogenesis. Photomorphogenesis includes tetrapyrrole and chlorophyll biosynthesis to  
123 establish photosystems along with carotenoid synthesis as an accessory pigment and  
124 ROS scavenger. Once photoautotrophic, protein biosynthesis is ramped up, hallmarked  
125 by the increased abundance of ribosomal proteins and proteins involved in translation  
126 and folding. Concomitantly, nuclear encoded proteins synthesized in the cytosol are  
127 imported. Finally mature chloroplasts with their established structures proliferate by  
128 division to accommodate cell expansion and division in the growing leaves.

129 Senescence is a coordinated process with several stages and developmental check  
130 points (Bleecker and Patterson, 1997; Rogers and Munne-Bosch, 2016). Early  
131 senescence syndrome involves reprogramming of gene expression (Breeze et al.,  
132 2011) and redox and ROS signaling. This is followed by ordered dismantling of the  
133 photosynthetic apparatus leading to ROS production and involving ROS control and  
134 nutrient remobilization to other plant parts in the case of leaves and to the developing  
135 ovary in the case of floral petals. The final result is cell death lastly followed by  
136 abscission in some organs such as floral petals.

137 Several post-transcriptional/translational mechanisms controlling protein abundance  
138 have just recently been uncovered in plant immunity (Meteignier et al., 2017; Xu et al.,  
139 2017; Tabassum et al., 2019). Therefore we investigated reshaping of the proteome in  
140 the steady state shift from growth to pattern triggered immunity (PTI). We measured

141 changes in protein abundance of more than 2,000 proteins in all avenues of PTI as well  
142 as photosynthesis and primary metabolism, giving a comprehensive picture of altered  
143 proteome architecture in basal immunity. The focus was set on hormone signaling and  
144 the deep proteomics measurements were complemented by targeted parallel reaction  
145 monitoring (PRM) proteomics, qPCR and phytohormone and amino acid  
146 measurements. Salicylic acid (SA) and Jasmonate (JA) are the phytohormones  
147 quintessentially associated with plant defense, the former constituting the backbone of  
148 resistance to biotrophic pathogens, the latter to necrotrophic pathogens as well as  
149 wounding (Pieterse et al., 2012). Their mutual antagonism to prioritize one defense  
150 strategy over the other as needed is a long standing paradigm in the field of plant  
151 immunity. However research in the last decade has made it clear, that JA also plays a  
152 role in resistance to biotrophs and pattern triggered immunity (PTI) which is however not  
153 yet fully understood (Nickstadt et al., 2004; Hillmer et al., 2017; Mine et al., 2017). The  
154 integrative –omics strategy applied here brought to light a previously unknown  
155 regulatory switch wherein a MYC2 dependent negative feedback loop controls JA-Ile  
156 and JA levels via deconjugation and hydroxylation by IAR3 and JOX2 respectively. It  
157 reconciles the well-known dampening of JA levels and suppression of JA signaling  
158 downstream of JA synthesis by SA, adding another feature to the picture of JA activity  
159 in PTI.

160 Finally we make both the raw and meta data produced in this study available to the  
161 general public (submission to Proteome Exchange and TAIR pending). The sampling  
162 depth of the proteome in development and immunity should prove to be a valuable  
163 resource to plant biologists.

164

165

## 166 Results

### 167 Deep proteomics method

168 We conducted discovery proteomics measurements of several *Arabidopsis thaliana* Col-  
169 0 tissues throughout the lifetime of the plant. These were roots, leaves, cauline leaves,

170 stem, flowers and siliques/seeds as well as whole plant seedlings as early as seven  
171 days up to 93 days of age when the plant was in late senescence (Supplemental figure  
172 1 and Supplemental methods and data tables 1 and 2). In addition we measured  
173 proteomes of PTI elicited plants treated with the peptide flg22. Primarily we were  
174 interested in reshaping of proteome architecture in these different biological scenarios  
175 to capture protein co-regulation and predict tissue and developmentally specific protein  
176 function.

177 To this end it was essential to develop a method that allows deep sampling of the plant  
178 proteome in a reasonable time frame. It was clear that this would have to begin with  
179 comprehensive extraction of tissue proteins and further entail multi-step fractionation of  
180 the complex extract. We settled on and optimized 4% SDS protein extraction and Gel-  
181 LC MS combining SDS-PAGE protein separation and reverse phase (RP) LC peptide  
182 separation on-line with ESI MS (see Supplementary methods and data and  
183 Supplemental figure 2 for full method and optimization details).

184 Plant tissue is more recalcitrant to proteomics analysis than other samples. The plant  
185 cell wall requires harsh disruption techniques. Plant tissue contains an abundance of  
186 secondary metabolites, oils and waxes and more significantly, in the case of green  
187 tissue, pigments as part of the light harvesting complexes, that all interfere with LC-MS.  
188 Green tissue also contains the most abundant protein on earth, Ribulose biphosphate  
189 carboxylase (RuBisCo) leading to suppression of less prominent ion signals in the mass  
190 analyzer and severely hampering detection of less abundant proteins.

191 SDS-PAGE alleviated all of these issues (Supplemental figure 3 A): i) It allowed the  
192 depletion of high amounts of SDS used for protein extraction. ii) Pigments and small  
193 molecules conglomerated in a green low molecular weight band below the protein front  
194 effectively partitioning them from the proteins. iii) RuBisCo large and small subunits  
195 (RBCL and RBCS) migrated to two prominent bands facilitating their separation from  
196 the rest of the proteome.

197 Five gel slices were in gel digested with trypsin and individually injected into the LC-MS  
198 neatly fractionating the proteome according to the molecular weight of its constituents  
199 (Supplemental figure 3 B). The most abundant plant proteins including RBCL and RBCS



200 were separated in individual fractions in both leaves and roots, diminishing the  
201 suppressive effects of over abundant proteins on peptide and protein identification in  
202 single shot LC-MS measurement of the entire proteome (Supplemental figure 3 C and  
203 D). This allowed the identification of between 5977 and 9524 protein groups per sample,  
204 each identified with at least 1 unique peptide at protein and peptide FDR thresholds of  
205 1%. These protein groups will henceforth be referred to as proteins (Supplemental table  
206 1 and Supplemental figure 3 E). Measurements of the individual proteomes showed  
207 intra sample variability that was considerably lower than the observed inter sample  
208 variability (Supplemental figure 3 F and G).

209

## 210 The *Arabidopsis* proteome

211 In the entire study we identified and quantified 15926 *Arabidopsis thaliana* proteins in  
212 total, 15845 encoded in the nuclear genome (Supplemental table 2). For further details  
213 on the parameters of the entire data set see Supplemental methods and data Table 3.  
214 Nuclear protein identifications were evenly distributed over all five chromosomes. We  
215 complemented the proteomics data with transcriptomics data from an extensive study of  
216 *Arabidopsis* development using microarrays that measured gene expression on 22157  
217 nuclear loci including 1058 non-protein coding genes (Schmid et al., 2005). Our  
218 proteomics data presents mass spectrometric evidence for cognate protein expression  
219 of 60% (and locally more) of the *Arabidopsis* nuclear genome and close to 70% or more  
220 of the transcriptome, including 1886 proteins for which no transcripts were identified or  
221 which were not on the microarray (Figure 1 A and B).

222 We then asked what precluded more extensive coverage of the *Arabidopsis* proteome,  
223 i.e. the missing proteome. We first looked at a potential impact of transcript abundance  
224 on the detection of cognate proteins and found that missing (not detected) proteins are  
225 evenly distributed over the range of transcript abundance with the exception of the most  
226 abundant transcripts for nearly all of which a cognate protein was detected (Figure 1 C).  
227 This indicates that transcript abundance is not the primary factor impeding protein  
228 detection. Next we investigated if gene length in base pairs as a proxy for protein length  
229 may have an impact and found that indeed the distribution of missing proteins was



230 shifted markedly towards smaller genes from the distribution of detected proteins

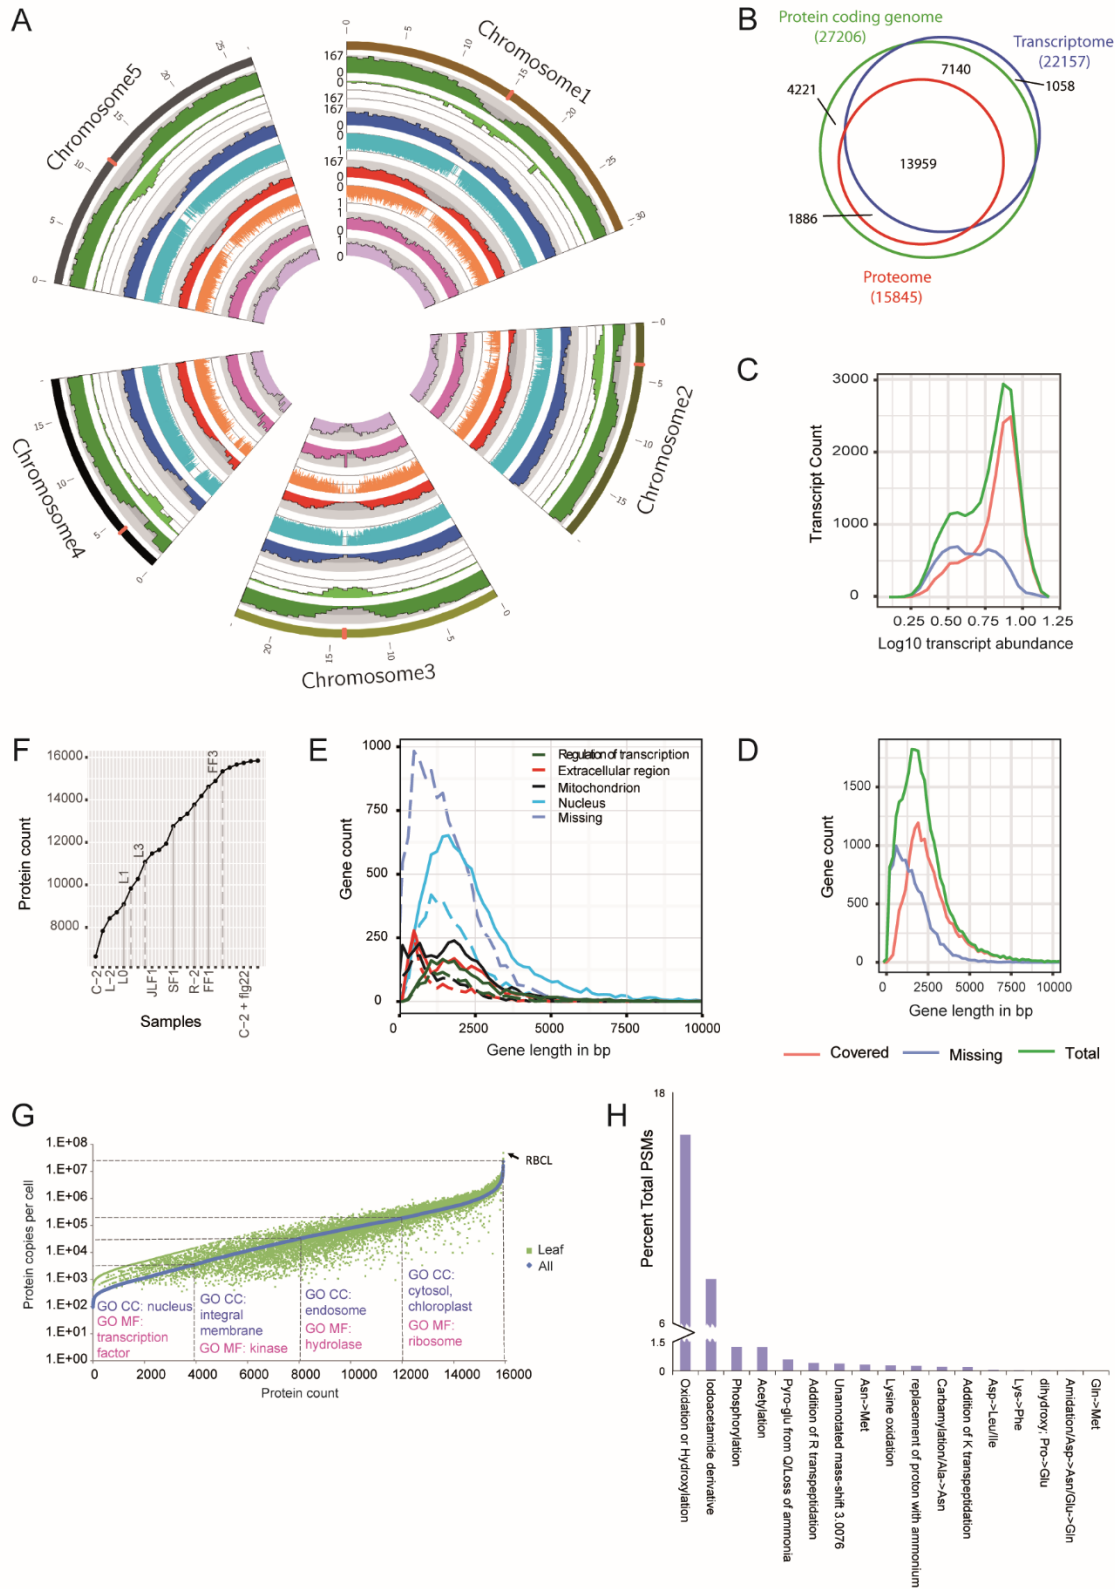

231

232 *Figure 1 Deep coverage of the Arabidopsis thaliana proteome. A. Mapping protein expression to the 5 Arabidopsis nuclear*  
233 *chromosomes (scale in Megabases (Mb), centromeres are indicated). Tracks from outside to inside: Number of protein coding*  
234 *genes per 500 Kb; scale 0 to 167 (maximum) [dark green]. Number of non-protein coding genes per 500 Kb; scale 0 to 167 [light*  
235 *green]. Number of transcripts per 500 Kb; scale 0 to 167 [dark blue]; Log<sub>10</sub> transcript abundance normalized to maximum*  
236 *transcript abundance; scale 0 to 1 [light blue]. Number of proteins per 500 Kb; scale 0 to 167 [dark red]. Log<sub>10</sub> protein*  
237 *abundance normalized to maximum protein abundance; scale 0 to 1 [light red]. Fraction of protein coding genes for which*  
238 *cognate proteins were detected; scale 0 to 1 [magenta]. Fraction of transcripts for which cognate proteins were detected; scale*  
239 *0 to 1 [light purple]. B. Scaled VENN diagram showing the coverage of protein coding genes by cognate transcripts and proteins.*  
240 *C. Relationship between transcript abundance and detection of its cognate protein. Green: all protein coding transcripts, red:*  
241 *protein coding transcripts with a detected cognate protein, blue: protein coding transcripts without a detected cognate protein.*  
242 *Frequency polygon drawn with 20 bins D. Relationship between protein coding gene size in bp and detection of its cognate*  
243 *protein. Green: all protein coding genes, red: protein coding genes with a detected cognate protein, blue: protein coding genes*  
244 *without a detected cognate protein. Frequency polygon drawn with bin size 190 bp. E. Size in bp of genes assigned to the gene*  
245 *ontology terms regulation of transcription, DNA templated (GO:0006355), extracellular region (GO:0005576), mitochondrion*  
246 *(GO:0005739) and nucleus (GO:0005634). Solid lines indicate all members of the GO term, dashed lines indicate members of the*  
247 *GO term not identified in the proteomics measurements, i.e. the missing proteome. Gene size of all proteins not identified in the*  
248 *proteomics measurements, the entire missing proteome is also indicated. Frequency polygon drawn with 350 bins and bin size*  
249 *190 bp. F. Cumulative increase in identified proteins, i.e. proteome coverage, as different tissues and flg22 treatment are*  
250 *sampled. G Copy numbers per cell of all identified proteins and leaf proteins as determined by proteomics ruler method*  
251 *(Wisniewski et al., 2014). Quartiles are indicated by dashed lines. Significantly enriched GO annotations by DAVID are shown for*  
252 *the individual quartiles. H Global survey of PTM in the Arabidopsis thaliana proteome. The relative abundance PTMs comprising*  
253 *0.1% or more of the total PSMs in at least 1 tissue type or biological scenario (flg22 treatment) are shown.*

254

255 (Figure 1 D). This suggests that protein size is a factor limiting protein detection. This  
256 effect could be observed for several gene ontology categories that were  
257 overrepresented in the missing proteome (Supplemental figure 4). Then we examined  
258 how tissue specific protein expression contributed to the cumulative expression of the  
259 entire proteome (Figure 1 F). While every tissue contributed to cumulative protein  
260 expression curve with a steep slope, it can also be seen that the curve converges on  
261 saturation as sample numbers increase. This was also the case for flg22 treated tissues  
262 sampled last, where one could expect expression of a host of immunity specific proteins  
263 not detected in normally developing tissue. This suggests that further sampling of  
264 *Arabidopsis* would not greatly increase coverage of the entire proteome.

265 We quantified all 15,927 measured proteins in terms of protein copy number per cell in  
266 the entire sample set and in leaf tissue (LF) by way of the proteomics ruler approach  
267 (Wisniewski et al., 2014). It equates the total histone MS signal (total number of histone  
268 PSMs in our case) to the cellular DNA mass allowing the conversion of PSMs to mass  
269 units and calculation of the total cellular protein mass. Individual to total protein PSM  
270 ratios can then be used to calculate individual protein copy numbers per cell.

271 The total cellular protein mass was calculated as 256.5 pg, in agreement with amounts  
272 from cell lines and tissues (Wisniewski et al., 2014). Protein copy numbers spanned a  
273 range of more than 5 orders of magnitude from just below 100 to 2.29e+07 copies per  
274 cell (Figure 1 G, Supplemental table 3). The most abundant protein was RBCL with  
275 4.73e+07 cellular copies in leaves. The total copy number of all detected small subunits  
276 was 5.4e+07 so the ratio of large to small subunits was 0.876, close to a 1:1 ratio. Gene  
277 ontology analysis of the proteins in the four quartiles showed that nuclear proteins and  
278 regulators of transcription were very specifically among the least abundant proteins  
279 (1750 of 3970 1<sup>st</sup> quartile proteins were annotated as nucleus). Membrane spanning  
280 proteins and kinases were generally also lower abundant, 1108 of 3970 2<sup>nd</sup> quartile  
281 proteins being annotated as integral membrane.

282 Protein post translational modification (PTM) is an essential modulator of protein  
283 function. Therefore we performed a proteome wide survey of global PTM in *Arabidopsis*  
284 *thaliana* with our deep proteomics data set using the “open-search” algorithm MS-  
285 Fragger (Kong et al., 2017). This led to the identification of more than 3.5 million PSMs  
286 from more than 11.6 million total acquired MS2 spectra. The most abundant PTMs  
287 comprising more than 0.1% of total PSMs in at least one tissue type or biological  
288 scenario are shown in figure 1 H (for full data see Supplemental table 4). Next to  
289 predominantly experimentally induced PTM (protein oxidation and  
290 carbamidomethylation of cysteine residues to reduce disulfide bonds), serine or  
291 threonine phosphorylation and N-terminal acetylation were abundant naturally occurring  
292 modifications affecting approximately 1.25% of total protein abundance.

293 Transpeptidation reaction, a non-translational mechanisms for the formation of peptide  
294 bonds, derived addition of amino acids was also detected. Furthermore, a number of  
295 amino acid substitutions in protein primary structure were common.

## 296 Architecture of Tissue and Developmental Proteomes

297 We utilized our extensive MS data collection as a resource to investigate the individual  
298 tissue proteomes during the *Arabidopsis* life cycle and co-regulation of protein  
299 abundance between them (Supplemental table 5). First we grouped all of the data  
300 tissue specifically also merging rosette and cauline leaves and qualitatively compared

301 the tissue proteomes which each comprised around 10,000 proteins (Supplemental  
302 table 6). Around 6,500 proteins (by far the largest set), were ubiquitous to all tissues  
303 whereas 500 to 600 proteins were unique to each tissue with exception of leaves which  
304 showed nearly 1,000 unique proteins, perhaps as a consequence of the larger number  
305 of aggregated leaf samples (Figure 2 A). Also around 1,000 proteins were absent in  
306 roots but present in all other tissues, reflecting the former tissues below ground nature.

307 The large volume of the data made PCA an attractive method to reduce its  
308 dimensionality and explore the relationships of the sampled proteomes. The first two  
309 principal components accounted for nearly 50% of the total variance indicating that the  
310 linear projection in this two dimensional subspace reflects the predominant data  
311 structure (Figure 2 B). The individual tissue proteomes were clearly separated with the  
312 exception of flowers and the inflorescence stem at the same point in development (66  
313 and 73 days). More interestingly, a developmental component was also visible in all  
314 sampled tissues, reflecting proteome remodeling during ageing (increasing sample age  
315 bottom right to top left; arrow). Hierarchical cluster analysis (HCL) corroborated the PCA  
316 results (Supplemental figure 5).

317 To investigate the dynamics of proteome structure and protein co-expression in tissue  
318 development in detail and thereby extrapolate protein function in previously undisclosed  
319 contexts, a noise robust soft partitioning technique that does not assign a feature  
320 exclusively to a single group, called fuzzy c-means clustering was applied (citation). The  
321 procedure produced 7 out of 16 clusters (clusters numbered 3, 4, 7, 8, 10, 11, 13) with  
322 biologically meaningful changes in protein abundance with a permutation based FDR of  
323 less than 1%.

#### 324 Root Proteome

325 The largest set of 577 proteins assigned to a cluster were root specific and not  
326 abundant or present in any other tissues at any of the sampled developmental stages  
327 (Cluster 3, Figure 2 C, Supplemental table 7). Gene ontology analysis of these proteins  
328 indicated that many of them were involved in processes related to the extracellular  
329 region, metal- binding and oxidation and reduction. We described the expression of  
330 these proteins in the context of phosphate metabolism previously (Hoehenwarter et al.,

331 2016). We compared our results to an exhaustive study of the root proteome by Lan et  
 332 al (Lan et al., 2012) and found that around 70% of the total root proteins we detected  
 333 were also present there. This intersection of 7577 proteins between our two respective

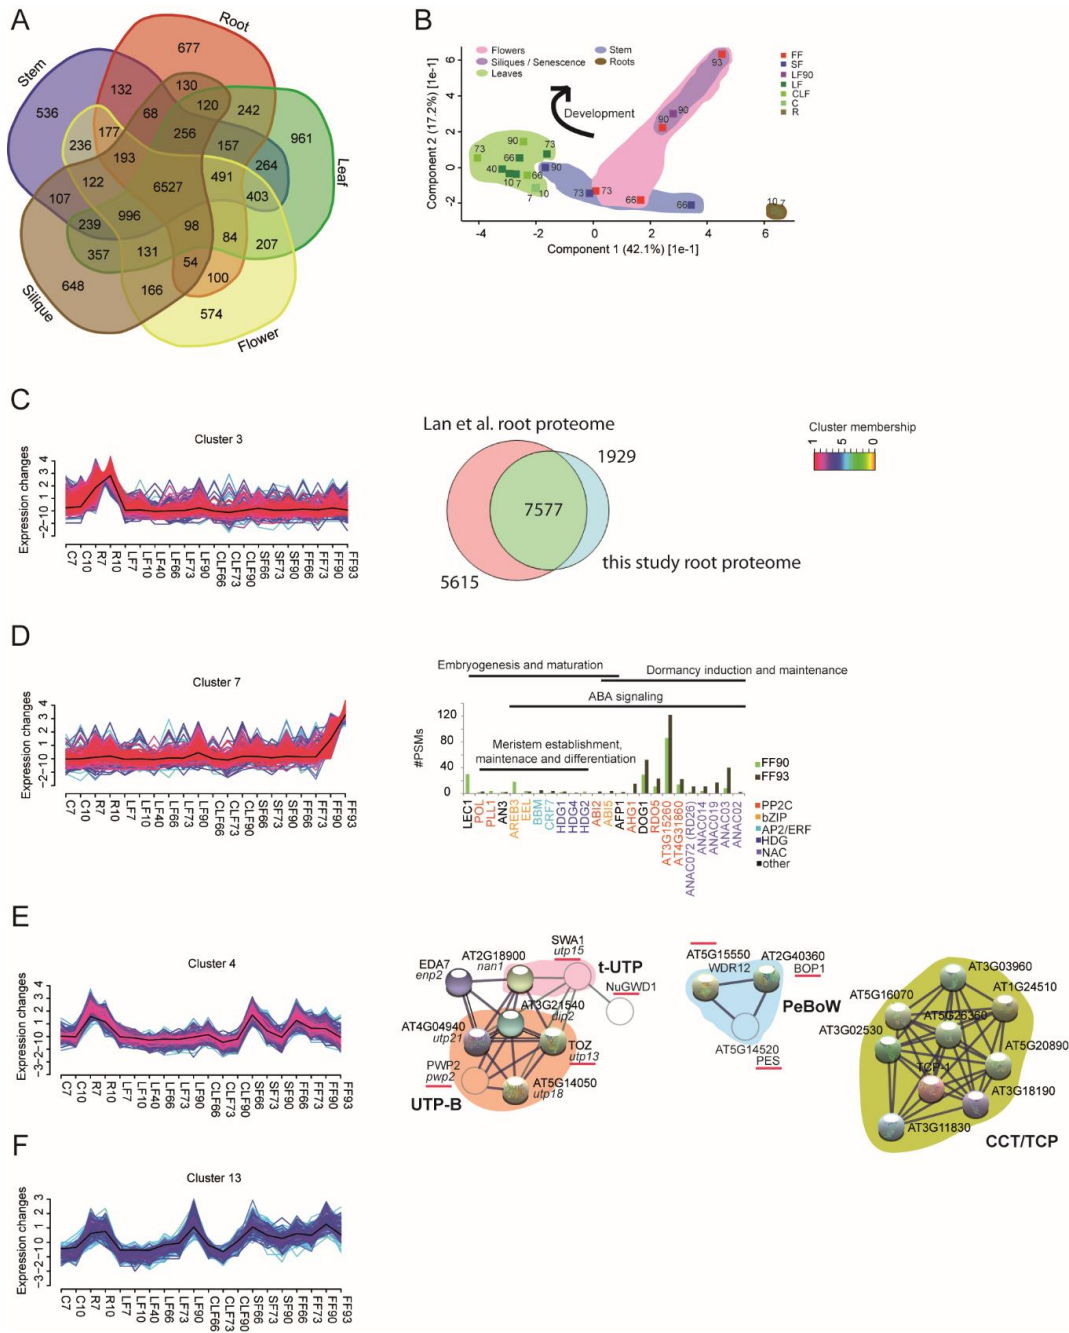

334

335 *Figure 2 Tissue and development specific dynamic architecture of the Arabidopsis*  
 336 *proteome. A. Qualitative comparison of Arabidopsis tissue proteomes. All*  
 337 *measurements of a tissue regardless of plant age were aggregated, leaves and cauline*  
 338 *leaves as well. B. Principal component analysis (PCA) of the deep proteomics*  
 339 *measurements of sampled tissues. Numbers indicate sample, i.e. plant age in days.*



340 *Tissues are color coded. Purple indicates late flowering stages, i.e. siliques and leaves*  
341 *in senescence. C. FCM cluster 3 showing proteins exclusively abundant in roots. Right*  
342 *panel: Qualitative comparison of all root proteins identified in this study and all root*  
343 *proteins identified in Lan et al. FCM core clusters were extracted wherein all clustered*  
344 *proteins have membership values  $\alpha$  exceeding a threshold of 0.5 meaning cluster*  
345 *members all have similarity to the cluster centroid greater than 0.5 (Futschik and*  
346 *Carlisle, 2005). D. FCM cluster 7 showing proteins increasing in abundance in seed*  
347 *development and exclusively present in seeds or siliques. Right panel: Protein*  
348 *abundance of kinases and transcription factors (PQI given is raw #PSMs) in the*  
349 *respective samples. E. FCM cluster 4. Right panel: Physical protein interaction networks*  
350 *produced with STRING database based on homology to yeast and human studies. Solid*  
351 *spheres in the UTP-B, t-UTP and PeBoW networks are proteins designated as DWD40*  
352 *by DAVID gene ontology analysis and part of the respective STRING input dataset*  
353 *(WD40/YVTN repeat-like-containing domain list Supplemental Table 9). Unfilled*  
354 *spheres are not part of the WD40 input set but are also members of cluster 4. Thin*  
355 *black edges indicate bona fide physical interactions identified in humans (Wan et al.,*  
356 *2015). Green edges indicate bona fide physical interactions identified in Arabidopsis*  
357 *(Ishida et al., 2016). Red underlines indicate deletion of the gene has a developmental*  
358 *phenotype. Yeast homologs of Arabidopsis gene names are given in italics. F. FCM*  
359 *cluster 13.*

360 studies allows us to define the core set of proteins most abundant in the root, the root  
361 core proteome.

## 362 Seed Proteome

363 Cluster 7 (Figure 2 D) contains proteins whose abundance increased specifically in  
364 seed. As expected, many of these were the more abundant seed storage proteins such  
365 as oleosins, albumins, cruciferins and enzymes of sugar and fatty acid metabolism.  
366 However, many of the core transcription factor, phosphatase and chromatin modifier  
367 modules that regulate seed development were also detected and quantified  
368 (Supplementary table 8 and Figure 2 D). The PP2C POL directs *WUS/WOX5* gene  
369 expression and is essential for meristem establishment and stem cell maintenance in  
370 the early embryo together with PLL1 (Song et al., 2008). Similarly, the AIL transcription  
371 factor BBM and HDG1 act antagonistically to balance stem cell proliferation and  
372 differentiation (Horstman et al., 2015) and AN3 establishes cotyledon identity upstream  
373 of PLETHORA1 (Kanei et al., 2012). The ABA signaling proteins which are known to  
374 play a major role in seed development were underrepresented in cluster 7 mainly  
375 because they either did not accumulate exclusively in seed or not in both of the  
376 measured stages (developing green and ripe brown siliques) but their abundance could

377 be easily reconstituted from the data. LEC1, the master inducer of seed development  
378 was highly abundant in the earlier stage together with AREB3 and EEL, two ABA  
379 responsive bZIP transcription factors that govern early seed maturation (Agarwal et al.,  
380 2011). The ratio of the bZIP transcription factor ABI5 to AFP1, a repressor of ABA  
381 signaling, both detected exclusively in mature to post mature seeds was greater than 1  
382 indicative of high ABA levels and induction and possible maintenance of seed dormancy  
383 in the brown siliques sample. Concomitantly the DOG1 protein and the RDO5 PP2C  
384 that are essential for seed dormancy (dormancy is completely abolished in the *dog1*  
385 knockout mutant also in the presence of ABA (Nee et al., 2017)) were abundant in the  
386 post mature seed proteome. A number of other PP2C proteins also accumulated to high  
387 levels specifically in siliques, particularly in brown siliques. The same was true for  
388 several members of a clade of NAC transcription factors also hitherto not known to play  
389 a role in seed development indicating potential functions for them in seed development  
390 and establishment of dormancy.

#### 391 Ribosomal Proteins in Development

392 The abundance of the 315 proteins in cluster 4 strongly increased or was exclusively  
393 measured in young roots, young stem and early flowers/floral buds. Their abundance  
394 decreased in the latter two tissues as development progressed (Figure 2 E). More than  
395 half of these proteins were localized in the nucleus and a substantial number of them  
396 pertained to nucleolar processes and ribosome biogenesis with WD40 proteins,  
397 containing the WD40 repeat molecular interaction domain, being highly significantly  
398 enriched (Supplemental table 9).

399 One of these was LEUNIG (LUG), a transcriptional co-repressor and master regulator of  
400 flower development that directly modulates antagonistic A and C class gene expression  
401 in the inner and outer whorls (Grigorova et al., 2011). TAIR10 annotated six WD40  
402 proteins as DWD components of CUL4 RING E3 ubiquitin ligases (Supplemental table  
403 9) but closer inspection revealed that AT3G56990 (EDA7) and AT4G04940 actually  
404 lacked the canonical DWD motif (Supplemental material and data), while the others  
405 belonged to the A clade of Arabidopsis DWD proteins (Lee et al., 2008). Among them



406 was DWA2, a negative regulator of ABA signaling that targets ABI5 to degradation (Lee  
407 et al., 2010).

408 We investigated potential interactions among the 18 WD40 proteins in cluster 4 using  
409 the STRING database set to produce essentially only true positive binary physical  
410 interactions. Five of the six components of the UTP-B complex, a sub-complex of the  
411 SSU-processome/90S pre-ribosome, were found to interact based on experimental  
412 evidence from yeast and human (Gavin et al., 2002; Gavin et al., 2006; Krogan et al.,  
413 2006; Wan et al., 2015), showing tissue and development specific expression of this  
414 entire protein complex (Figure 2 E, Supplemental figure 6 and Supplemental table 9 for  
415 raw abundance values). The complex interacted with EDA7, the homolog of enp2  
416 (Soltanieh et al., 2014), a putative ribosome biogenesis factor (RBF) which is not known  
417 in *Arabidopsis*. NuGWD1 a sugar inducible WD40 protein was reported to interact with  
418 SLOW WALKER 1 (SWA1) which is a component of the t-UTP sub-complex of the SSU  
419 processome and which was also shown to interact with several UTP-B members by co-  
420 IP MS in *Arabidopsis* (Ishida et al., 2016). SWA1 is not a WD40 protein but the pattern  
421 of its abundance was very similar to the protein expression pattern of the cluster 4  
422 proteins (Supplemental Table 9 for raw abundance values). Another WD40 protein  
423 containing complex, all of whose components were measured and showed the same  
424 expression pattern, elevated in roots, young shoots and early flowers/floral buds was  
425 the PeBoW complex which is essential for pre-rRNA processing (Cho et al., 2013; Ahn  
426 et al., 2016). Additionally, extensive physical interaction between a large number of  
427 ribosomal (RPs) and other ribosome associated proteins with this expression pattern  
428 became evident when interactions between all 315 cluster 4 proteins was assayed  
429 (Supplemental figure 6). However, the cluster 4 expression pattern of the RBF protein  
430 complexes was significantly more conserved than expression patterns of ribosomal  
431 proteins (Supplemental Figure 7).

432 Molecular chaperones were also highly significantly enriched among the cluster 4  
433 proteins. Nine of these 21 proteins putatively interact physically based on x-ray  
434 crystallography and tandem affinity purification studies in yeast and human (Dekker et  
435 al., 2011; Hauri et al., 2016). All of these TCP-1/cpn60 proteins are homologs of the

436 yeast and human cytosolic chaperonin CCT proteins suggesting they constitute the  
437 hardly described CCT complex in *Arabidopsis* and that its abundance is tissue and  
438 developmentally specific (Figure 2 E and Supplemental table 9 for raw abundance  
439 values).

#### 440 Vesicle Trafficking and Transport

441 A set of 153 proteins were abundant in roots, increased during ageing and peaking in  
442 senescence in leaves and increased in the young inflorescence stem and flowers  
443 (Cluster 13, Figure 2 F Supplemental table 10). These proteins were largely related to  
444 vesicle trafficking, Golgi apparatus and membrane transport. They contained numerous  
445 exocyst complex members, SNAREs and cytoskeletal proteins such as actin. Vesicle  
446 trafficking and cytoskeletal remodeling and organization are central processes in tip  
447 growing cells which are well studied in root hairs (Rounds and Bezanilla, 2013), but are  
448 also prevalent in fast growing tissues such as the emerging inflorescence stem and  
449 flowers (Chen et al., 2009). On the other hand, autophagy, a process which also  
450 involves the formation of lytic compartments and vesicle trafficking for the degradation  
451 of cytoplasmic material is known to play an important role in senescence in leaves and  
452 other tissues (Wojciechowska et al., 2018).

#### 453 The Proteome in Establishment and Maintenance of Photosynthesis

454 Clusters 11 and 8 (Supplemental tables 11 and 12 respectively) were almost exclusively  
455 comprised of proteins annotated as chloroplast localized (297 of 326 nuclear plus 18  
456 plastid encoded and 223 of 264 nuclear plus 20 plastid encoded, respectively) and  
457 essential to photosynthesis by DAVID GO. Proteins were absent in roots and mature  
458 brown siliques and predominant in green tissues, primarily leaves and cauline leaves.  
459 The abundance of cluster 11 proteins peaked in cotyledons of 7 and 10 day old  
460 seedlings and young cauline leaves and declined in these tissues in the course of  
461 ageing, whereas cluster 8 proteins were consistently abundant throughout the plant  
462 lifecycle, in rosette leaves with a slight maximum at 40 days and declining in  
463 senescence (Figure 3 A and B).

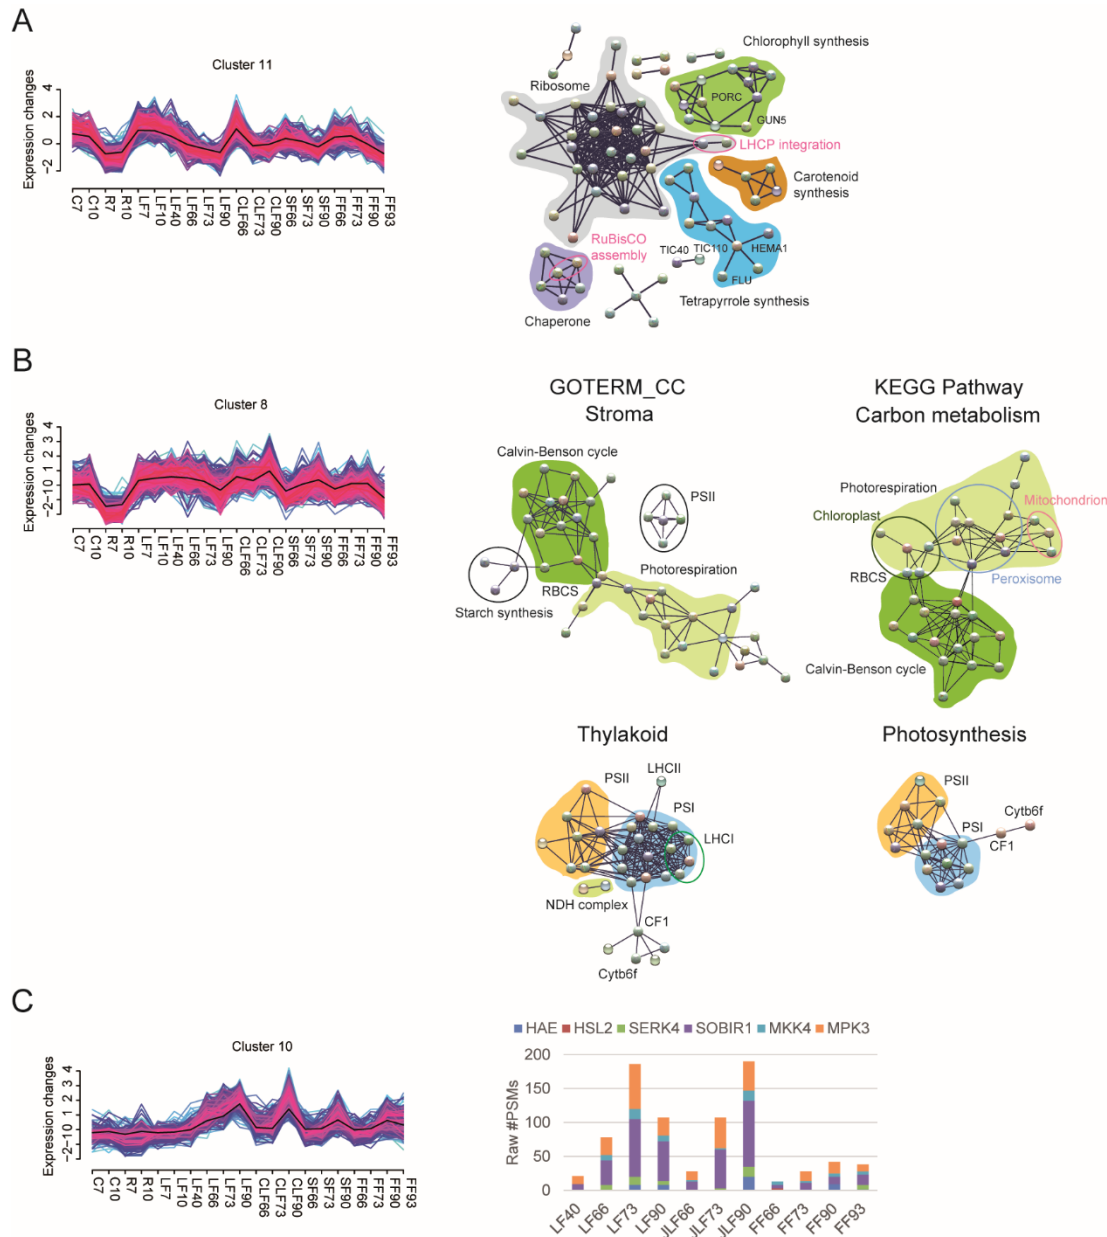

464

465 *Figure 3 Proteome remodeling in establishment and maintenance of photosynthesis as well as in degradation of photosynthesis*  
 466 *apparatus and senescence in leaves. A. FCM cluster 11. Right panel: Physical / functional protein interaction networks generated*  
 467 *with the STRING database using all proteins assigned to the GOTERM category Chloroplast (Supplemental Table 11) as input set.*  
 468 *Various biochemical pathways in pigment and photosynthesis related protein synthesis and chloroplast biogenesis are color*  
 469 *coded and indicated. B. FCM cluster 8. Right panel: Physical / functional protein interaction networks generated with the STRING*  
 470 *database using all proteins assigned to the GOTERM categories Stroma, Thylakoid, Carbon metabolism (C Metabolism) and*  
 471 *Photosynthesis as input sets (Supple,emtal Table 12). Light independent reactions are highlighted in green (Calvin-Benson cycle*  
 472 *dark, photorespiration light), light dependent reactions in orange (photosystem II PSII) and blue (photosystem I PSI).*  
 473 *Cluster 10. Right panel Cumulative abundance (PQI given is raw #PSMs) of core abscission signaling module proteins in leaves,*  
 474 *cauline leaves, flowers and siliques.*

475 The proteins in cluster 11 primarily function in chloroplast biogenesis and the  
 476 establishment of the functional photosynthetic machinery. A number of central players in

477 these molecular events were identified including HEMA1 and GUN5 (as well as GUN4),  
478 (Liu et al., 2017) that also represent hubs in STRING generated networks of cluster  
479 member proteins interacting in tetrapyrrole and chlorophyll synthesis, respectively  
480 (Figure 3 A, complete annotated network Supplemental figure 8). Other cluster proteins  
481 were interaction partners in carotenoid synthesis. Around 30 cluster proteins were  
482 classified as ribosomal proteins or related to translation by DAVID GO which was  
483 reflected by a highly connected interaction network composed of chloroplast specific  
484 ribosomal proteins, ribosome associated proteins or RBFs, the gene knockouts of many  
485 of which have embryo lethal phenotypes. CPN60 and CPN10 class molecular  
486 chaperones formed another cluster of interactors. Protein import from the cytosol is  
487 essential to chloroplast biogenesis and constituents of the Toc/Tic complex including  
488 TOC33, which is known to be most strongly expressed in young seedlings were cluster  
489 members (Waters and Langdale, 2009). The two proteins forming the inner division ring  
490 mediating chloroplast division, FtsZ1 and FtsZ2, were also cluster members (Waters  
491 and Langdale, 2009). DAVID GO mapped the cluster proteins to several plastid  
492 structures thereby giving a possible inkling of their localization within the chloroplast.

493 Cluster 8 mostly contained proteins prevalent in mature chloroplast directly related to  
494 photosynthesis. Cluster members constituted extensive parts of both the light  
495 dependent and independent reactions. Regarding the former, most components of the  
496 oxygen evolving photosystem II (PSII) and photosystem I (PSI), providing the final  
497 strong reducing potential, were identified, many of them being close interactors (Figure  
498 3 B). Components of the electron transferring Cytb<sub>6</sub>f complex and the thylakoid ATP  
499 synthase CF<sub>1</sub> were also present. Regarding carbon fixation, nearly all components of  
500 the Calvin-Benson cycle and many of the proteins involved in photorespiration were  
501 mapped as functional interaction partners (Figure 3 B). Furthermore, functional  
502 interaction mapping could resolve organelle specificity of the individual reactions in  
503 photorespiration. Interaction networks produced from GO category stroma and carbon  
504 metabolism and from GO category thylakoid and photosynthesis protein sets were  
505 specific and showed extensive overlap attesting to the quality of protein extraction from  
506 the chloroplast compartments (full annotated networks Supplemental figure 9 to 12).

## 507 The Proteome in Senescence

508 Cluster 10 contained 241 proteins whose abundance increased substantially during the  
509 course of plant life and peaked in the latest developmental stage, i.e. during leaf and  
510 flower senescence and fruit ripening, predominantly in rosette leaves but also in cauline  
511 leaves, stem and flowers (Supplemental table 13). They were not abundant in young  
512 tissues (Figure 3 C).

513 Senescence is a controlled developmental process that entails disassembly of the  
514 photosynthetic apparatus in leaves for the purpose of nutrient remobilization and  
515 resource allocation to fruit ripening in flower petals (Bleecker and Patterson, 1997).  
516 Conversely, numerous proteins involved in chlorophyll and carotenoid degradation were  
517 found including Pheophorbide a oxidase that is the key enzyme in the formation of  
518 primary fluorescent chlorophyll catabolites (pFCCs). It has been shown that  
519 nonfluorescent dioxobilin-type chlorophyll catabolites (NDCCs) represent the major end-  
520 products of chlorophyll catabolism as opposed to NCCs and that the Cytochrome P450  
521 monooxygenase CYP89A9 is responsible for their accumulation (Christ et al., 2013).  
522 This protein was also a cluster member as well as 13 other CYPs. Twelve of the 14 total  
523 CYPs belonged to the CYP71 clan suggesting a broader role for these proteins going  
524 beyond CYP89A9.

525 During senescence large amounts of ROS are produced which must be controlled so as  
526 not to lead to tissue damage and premature cell death (Rogers and Munne-Bosch,  
527 2016). Many cluster proteins were involved in oxidative-reductive processes and ROS  
528 scavenging including the centrally important cytosolic ascorbate peroxidase APX6.  
529 More interestingly, a significant group of cluster proteins were kinases. Six of these  
530 (CRK7, CRK8, CRK10; CRK14, CRK21, CRK41) were Cysteine-rich Receptor-like  
531 Kinases (CRKs) that have two extracellular DUF26 domains that each contain 4  
532 conserved cysteine residues. Next to the programmed loss of redox control leading to  
533 ROS accumulation and ultimately cell death at the later stages of senescence, ROS  
534 may also play an important role in signaling, mediating genetic reprogramming during  
535 senescence (Breeze et al., 2011), the mechanisms of which however are largely  
536 unexplored. The CRK cysteine thiol groups will likely be sensitive to the redox state,

537 potentially implicating these proteins as ROS sensors and ROS signaling initiators in  
538 senescence.

539 Abscission of floral organs after fertilization is another developmental process that  
540 occurs late in the *Arabidopsis* life cycle. Most of the proteins of the canonical abscission  
541 signaling module (Meng et al., 2016) including the receptor like protein kinases HAESA  
542 (HAE), HAESA-like 2 (HSL2), and EVERSLED (EVR/SOBIR1), the co-receptor  
543 SOMATIC EMBRYOGENESIS RECEPTOR-LIKE KINASE 4 (SERK4) and MKK4 and  
544 MPK3, the mitogen associated protein kinase cascade downstream of the HAE receptor  
545 complex were cluster members. The proteins accumulated in flowers and later siliques  
546 as development progressed (Figure 3 C right panel). Interestingly, their abundance also  
547 increased in leaves and cauline leaves although leaf abscission is not developmentally  
548 timed suggesting an unknown function of this abscission signaling module.

#### 549 Proteome Remodeling in Steady State PTI

550 In addition to tissue proteomes and their alteration in the course of development, we  
551 were interested in assaying more rapid changes in proteome architecture such as  
552 determined by steady state shifts from ordinary growth to immunity. Seven and ten day  
553 old seedlings grown in liquid culture were treated with a final concentration of 1  $\mu$ M flg22  
554 in the medium for 16 hours. Flg22 is the 22 amino acid N-terminal epitope of flagellin  
555 and elicits pattern triggered immunity (PTI) downstream of the receptor like kinase  
556 (LRR-RLK) FLAGELLIN-SENSITIVE 2 (FLS2). Deep proteomics measurement of the  
557 untreated and treated samples identified 8344 proteins in all (Supplemental table 14).  
558 HCL showed that the abundance of 1774 proteins increased whereas the abundance of  
559 915 decreased in both samples as a result of flg22 exposure (Supplemental table 15).

560 These proteins were categorized by mapping them to a self-constructed model of PTI  
561 using the MapMan software (Supplemental data for details, Supplemental table 16,  
562 Supplemental figure 13). The result was a comprehensive picture of proteome  
563 remodeling in PTI showing extensive changes in protein abundance in most of the  
564 major perception, signaling and response pathways. Dynamics of the flg22 receptor  
565 complex, including decreased abundance of FLS2 as a result of internalization and  
566 degradation (Robatzek et al., 2006) and a host of other RLKs were quantified. Vesicle



567 trafficking and transport proteins including exocyst and SNARE complex members  
568 increased in abundance along with proteins involved in the early respiratory burst,  
569 primarily RESPIRATORY BURST OXIDASE HOMOLOGUE D (RBOHD). All of the  
570 components of both MAPK signaling cascades central to plant immunity, MKK4/5-  
571 MPK3/6/11 and MKK2-MPK4 (Bigéard et al., 2015) were measured and also showed a  
572 slight increase in their abundance. The same goes for the calcium-dependent protein  
573 kinases (CDPKs) integral to PTI signaling, CPKs 4, 5 and 6 (Boudsocq et al., 2010), as  
574 well as a host of other CDPKs, calmodulin (CAM) and CAM binding proteins and  
575 calcineurin (Supplemental table 17). Interestingly several proteins showing changes in  
576 their abundance upon PAMP stimulus were mapped to other avenues of plant immunity  
577 such as effector triggered immunity (ETI) and programmed cell death (PCD) and  
578 systemic acquired resistance (SAR).

579 We investigated proteome plasticity in more detail beginning with the category hormone  
580 signaling and branching out from it to produce a proteomics model of phytohormone  
581 activity in PTI (Figure 4 Supplemental table 18). The deep proteomics results were  
582 complemented by measurements of the plant hormones themselves, amino acids and  
583 secondary metabolites after 16 hours of flg22 treatment. Furthermore, we undertook a  
584 retention time scheduled, parallel reaction monitoring (PRM) based targeted proteomics  
585 study that allowed accurate quantification and inference of statistical significance of fold  
586 changes of 52 model proteins in three sample pools of 10 day old *Arabidopsis* seedlings  
587 again following 16 hours of flg22 treatment (Figure 5, Supplemental Table 19). The  
588 PRM based estimates of protein abundance fold changes were in full agreement with  
589 the deep proteomics quantification highlighting the latter's accuracy and power of the  
590 deep proteomics strategy in general.

591 The abundance of 43 proteins playing roles in photosynthesis decreased slightly after  
592 16 hours of exposure to flg22 (Supplemental table 20). Fifteen of these were assigned  
593 to the photosynthesis light reaction and 6 of these in turn to photosystem II by the  
594 MapMan software (MapMan bins PS.lightreaction and PS.lightreaction.photosystem



595 II.LHC-II respectively, Supplemental table 20). Both bin assignments were statistically

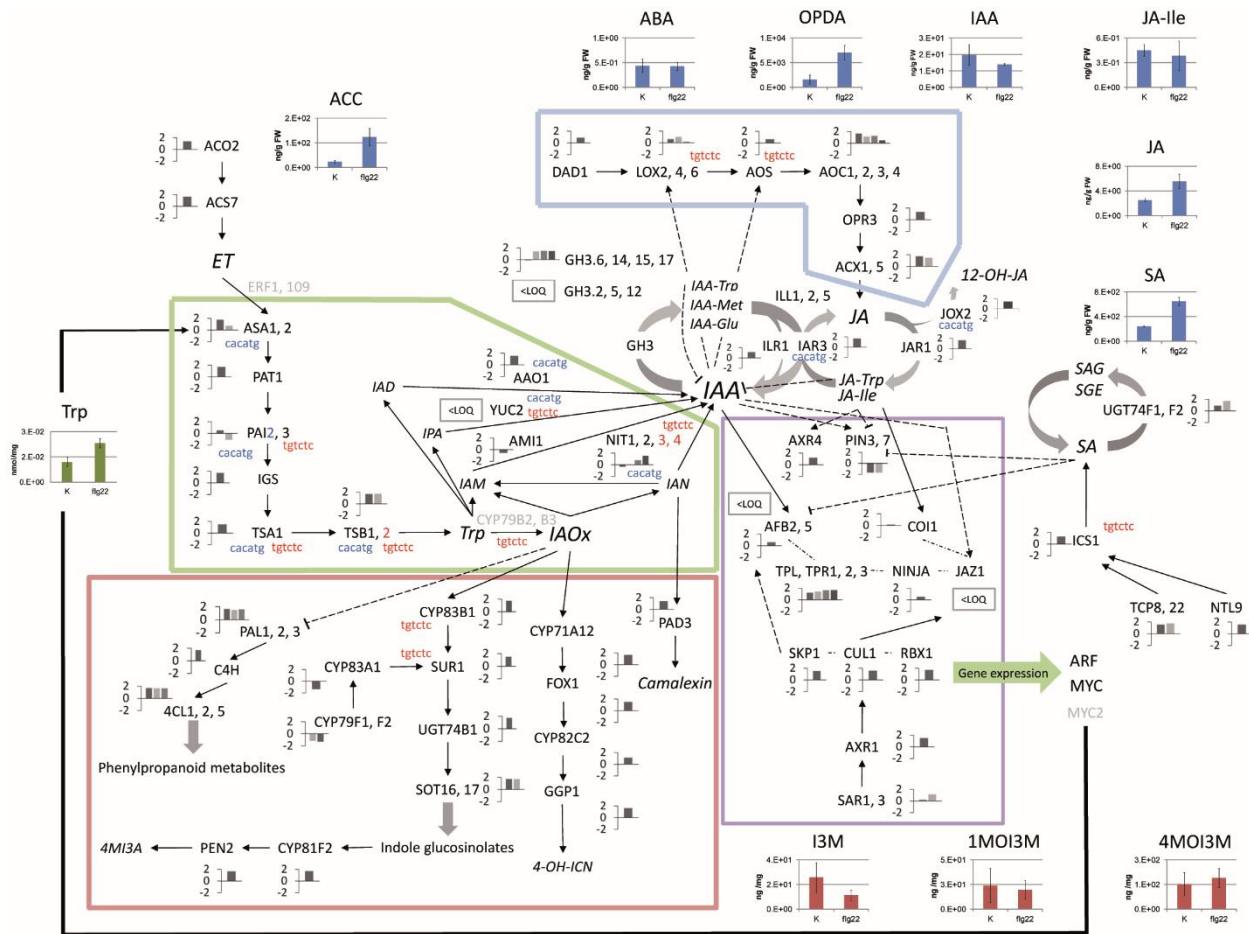

596

597 *Figure 4 Proteomics model of phytohormone activity in PTI. The figure shows the proteins quantified in the jasmonate (blue),*  
 598 *tryptophan and IAA (green), secondary defense compounds/indolic glucosinolate (red) biosynthesis pathways as well as IAA and*  
 599 *JA signaling pathways (purple). Note all or nearly all components of these biochemical pathways were measured and quantified*  
 600 *in the deep proteomics study. Proteins pertaining to ET and SA synthesis as well as reversible hormone conjugation (GH3s) and*  
 601 *modification are also shown. Protein with names in black were measured; bar charts next to protein names indicate relative*  
 602 *changes in abundance after flg22 treatment; values are the sum of z-score transformed raw #PSMs in flg22 treated samples.*  
 603 *Proteins in grey were not detected. Red nucleotide sequence indicates an ARF1 binding site in the cognate genes promoter*  
 604 *region, blue a MYC2 binding site. Solid arrows indicate direct functional interaction or immediately neighboring steps in*  
 605 *biochemical pathways. Dashed arrows indicate more distal interactions. Phytohormone, tryptophan and indole glucosinolate*  
 606 *abundance 16 hours after flg22 treatment are also shown.*

607 significant (Benjamini Hochberg corrected p-values <0.01) indicating these categories  
 608 were enriched among the 43 proteins. Other proteins were assigned to the carbon  
 609 reactions, more specifically the Calvin-Benson cycle (Supplemental table 20). The  
 610 relatively small decrease in abundance of a set of these proteins was corroborated by  
 611 small yet significant fold changes (maximum decrease -0.6 log<sub>2</sub> fold change) in the PRM  
 612 study (Supplemental figure 14 and Supplemental table 19). These results suggest that  
 613 photosynthesis is inhibited upon PAMP perception and conversely in PTI.

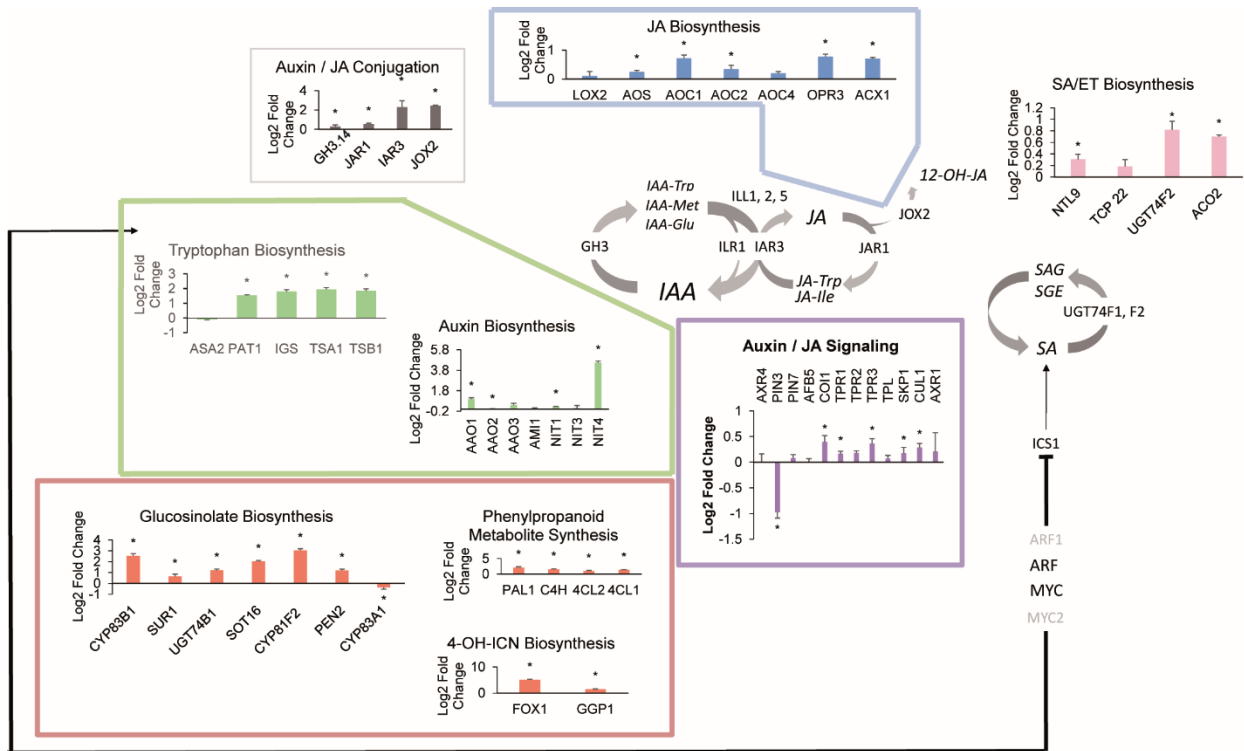

614

615 *Figure 5 Targeted PRM based quantification of model proteins. Framework is in analogy to figure 4. Bars represent log<sub>2</sub> fold*  
 616 *changes of protein abundance after 16 hours of flg22 exposure (1μM concentration in medium) estimated by area under the*  
 617 *curve label free protein quantification index (PQI) of the 6 most intense product ions from MS2 spectra of targeted proteotypic*  
 618 *peptides. Bars represent median PQI of all quantified proteotypic peptides for a given protein in 9 measurements (3 biological*  
 619 *replicates each measured 3 times). Standard error is indicated. Star indicates significance α=0.05 if fold change of at least one of*  
 620 *the quantified peptides was significant.*

621 The abundance of 93 proteins playing roles in plant primary metabolism, especially  
 622 carbohydrate metabolism, increased upon exposure to flg22. 22 were categorized as  
 623 pertaining to glycolysis (MapMan bin glycolysis), 19 to the TCA cycle (MapMan bins  
 624 TCA / org. transformation.TCA and TCA / org. transformation.other organic acid  
 625 transformations) and 6 to major CHO metabolism (mapMan bin major CHO  
 626 metabolism.degradation.starch), among others by the MapMan software. Increases in  
 627 abundance were more pronounced than the downregulation of photosynthesis related  
 628 proteins and log<sub>2</sub> fold changes up to 1.6 were quantified and significant in the PRM  
 629 study (Supplemental figure 14 and Supplemental table 19).

### 630 Jasmonate and Salicylic Acid Cross Talk

631 Sixteen hours of flg22 exposure led to an increase in the abundance of both salicylic  
 632 acid (SA) synthesis pathway proteins, primarily ISOCHORISMATE SYNTHESIS 1

633 (ICS1) but also upstream transcription factors TEOSINTE  
634 BRANCHED1/CYCLOIDEA/PCF 8 and 22 (TCP8, TCP22) (Wang et al., 2015) and  
635 NTM1-Like 9 (NTL9) (Zheng et al., 2015) and free SA levels (nearly 3-fold).

636 Jasmonate (JA) and jasmonate-isoleucine (JA-Ile), its bioactive conjugate, levels were  
637 both low, although the former increased around 2-fold, the latter showed no significant  
638 change and absolute levels of both were in the range of a few ng/g FW. Concurrently,  
639 (+)-12-oxo-phytodienoic acid (OPDA) levels increased from 1.6 to 7 µg/g FW so were  
640 high and elevated more than 4-fold following flg22 treatment. OPDA is a primary JA  
641 precursor synthesized from allene oxides by ALLENE OXIDE CYCLASE 1 to 4 (AOC1  
642 to 4). ACC, the ethylene precursor and a proxy for the phytohormone's abundance  
643 increased more than 5-fold.

644 Controversially, the deep proteomics measurements showed elevated protein amounts  
645 of all components of the JA biosynthesis pathway, corroborated as significant in the  
646 PRM study. Moreover the core JA receptor complex / signaling proteins CORONATINE  
647 INSENSITIVE 1 (COI1), TOPLESS RELATED PROTEINS 1 to 3 (TPR1 to 3) and S  
648 PHASE KINASE-ASSOCIATED PROTEIN 1 (SKP1) and CULLIN 1 (CUL1) proteins,  
649 members of the E3 ubiquitin ligase SCF complex, were all significantly increased in  
650 abundance, albeit slightly. The abundance of a large number of GRETCHEN HAGEN  
651 (GH) enzymes, the amidohydrolase IAA-ALA RESISTANT3 (IAR3) and JASMONATE-  
652 INDUCED OXYGENASE 2 (JOX2) also increased following exposure to the PAMP, the  
653 latter two significantly around 5-fold. These enzymes are all involved in conjugating or  
654 deconjugating phytohormones, specifically JA and auxin (IAA) to amino acids or small  
655 molecules or hydroxylating them (JOX2) thereby modulating their sub-cellular location  
656 and/or rendering them active or inactive.

657 The proteomics results imply, that flg22 induced PTI prioritizes SA over JA signaling. On  
658 the other hand, the induction of both JA synthesis and signaling pathways on the protein  
659 level and the highly elevated abundance of both IAR3 and JOX2, which deconjugate  
660 JA-Ile to JA and hydroxylate the latter to 12-OH-JA, together with the low JA and JA-Ile  
661 levels themselves, suggests that phytohormone conjugation may play a pivotal role in  
662 this context and a role for JA in PTI.

663 Auxin/IAA homeostasis

664 The detection of numerous GH proteins known to conjugate auxin/IAA (GH3.2,  
665 GH3.5/WES1 and GH3.17/VAS2) and others prompted us to investigate the role of this  
666 phytohormone in PTI. The levels of GH3.14, GH3.15 and GH3.17 increased upon flg22  
667 exposure, the first significantly 1.2 fold. GH3.15 (AT5G13370) function in conjugating  
668 the IAA precursor IBA has just recently been elucidated (Sherp et al., 2018). GH3.14  
669 (AT5G13360), the neighboring gene, does not show any significant sequence  
670 homology indicating a potentially different uncharacterized function in PTI.

671 Auxin/IAA is synthesized by tryptophan dependent and independent pathways. Both  
672 deep and targeted proteomics results showed significant substantial increase in the  
673 abundance of all proteins in the tryptophan biosynthesis pathway and tryptophan levels  
674 were also elevated almost 2-fold upon 16 hours of PAMP treatment. Tryptophan  
675 channels into a host of defense related secondary metabolite synthesis pathways  
676 particularly indole glucosinolates (IGs), the protein abundances of which all increased  
677 highly (2-fold or more) and significantly. IG levels themselves, indol-3-  
678 ylmethylglucosinolate (I3M), 1-methoxy-indol-3-ylmethylglucosinolate (1MOI3M) and 4-  
679 methoxy-indol-3-ylmethylglucosinolate (4MOI3M), did not change significantly.  
680 Presumably they were hydrolyzed by the mirosinase PENETRATION 2 (PEN2), whose  
681 abundance, along with CYP81F2, which showed an 8.2 fold change in abundance,  
682 increased 2.3 fold in response to flg22, to play a role in callose deposition (Clay et al.,  
683 2009).

684 Several proteins potentially involved in auxin/IAA synthesis pathways were identified.  
685 The abundance of ALDEHYDE OXIDASE 1 (AAO1) increased nearly 2-fold and that of  
686 the NITRILASES 1 and 4, 1.2 and 23 fold, respectively. Auxin/IAA levels however  
687 decreased slightly (0.75 fold) but significantly (p-value 0.051, two sample t-test equal  
688 variance, n=5,  $\alpha=0.1$ ). AAO1 has recently been shown to play a role in converting the  
689 I3M downstream hydrolysis product indole-3-carbaldehyde (ICHO) to indole-3-  
690 carboxylic acid (ICOOH) in the abiotic stress response (Muller et al., 2019).

691 *Pseudomonas syringae pv tomato DC3000* (*Pst* DC3000) infection induced a strong  
692 transcriptional response of the nitrilases NIT2, NIT3 and NIT4 which was corroborated

693 by increased protein abundance in the case of NIT2. It was postulated that NIT2 is  
694 involved in IAA signaling in R gene mediated resistance and defense against biotrophic  
695 pathogens (Choi et al., 2016). The more than 20-fold increase in the abundance of  
696 NIT4 that we measured suggests an unknown function of this protein in basal resistance  
697 to biotrophic pathogens.

698 While auxin/IAA levels did not change substantially even 16 hours after PTI induction,  
699 the abundance of polar auxin transporters was markedly affected. Particularly, the  
700 abundance of PIN-FORMED 3 (PIN3), a polar efflux carrier with well documented  
701 functions in lateral root growth and tropism decreased significantly 2-fold. A similar  
702 decrease was apparent for PIN-FORMED 7 (PIN7) in the deep proteomics results which  
703 is also known to affect lateral root growth. Both PIN 3 and 7 have important roles in  
704 establishing local auxin concentration maxima (Jang et al., 2018). The abundance of  
705 AUXIN RESISTANT 4 (AXR4) an ER protein that is responsible specifically for the  
706 distribution and localization of the influx carrier AUXIN RESISTANT 1 (AUX1) was also  
707 elevated slightly. PIN3, PIN7 and AUX1 are the primary components of the polar auxin  
708 transport system so our results indicate active, cell-to-cell auxin transport is perturbed in  
709 steady state PTI.

#### 710 Chronology and Model of Phytohormones in PTI

711 It has been documented that JA, IAA and SA act in chronological order in the  
712 establishment of SAR and that JA plays an early role (Truman et al., 2010a). Therefore,  
713 we measured hormone levels 1, 3 and 16 hours and OPR3 (as a marker for JA  
714 synthesis), JOX2 and COI1 and TPR1 (as markers for JA signaling) transcript levels 3  
715 and 16 hours after flg22 exposure (Supplemental tables 21 and 22 and Figure 6). SA  
716 accumulated after 1h and levels remained elevated until 16h after exposure. JA and JA-  
717 Ile levels remained basal throughout the entire time course. OPDA levels however  
718 increased substantially already 1 hour after PAMP treatment and remained elevated  
719 over time and OPR3 transcript abundance increased significantly 5.7 fold 3 hours after  
720 PAMP exposure and decreased to basal levels at the 16 hour time point. Together this  
721 suggests that the JA biosynthesis pathway is induced early in PTI. JOX2 transcripts



722 were elevated substantially and significantly 3 hours and remained high up to 16 hours

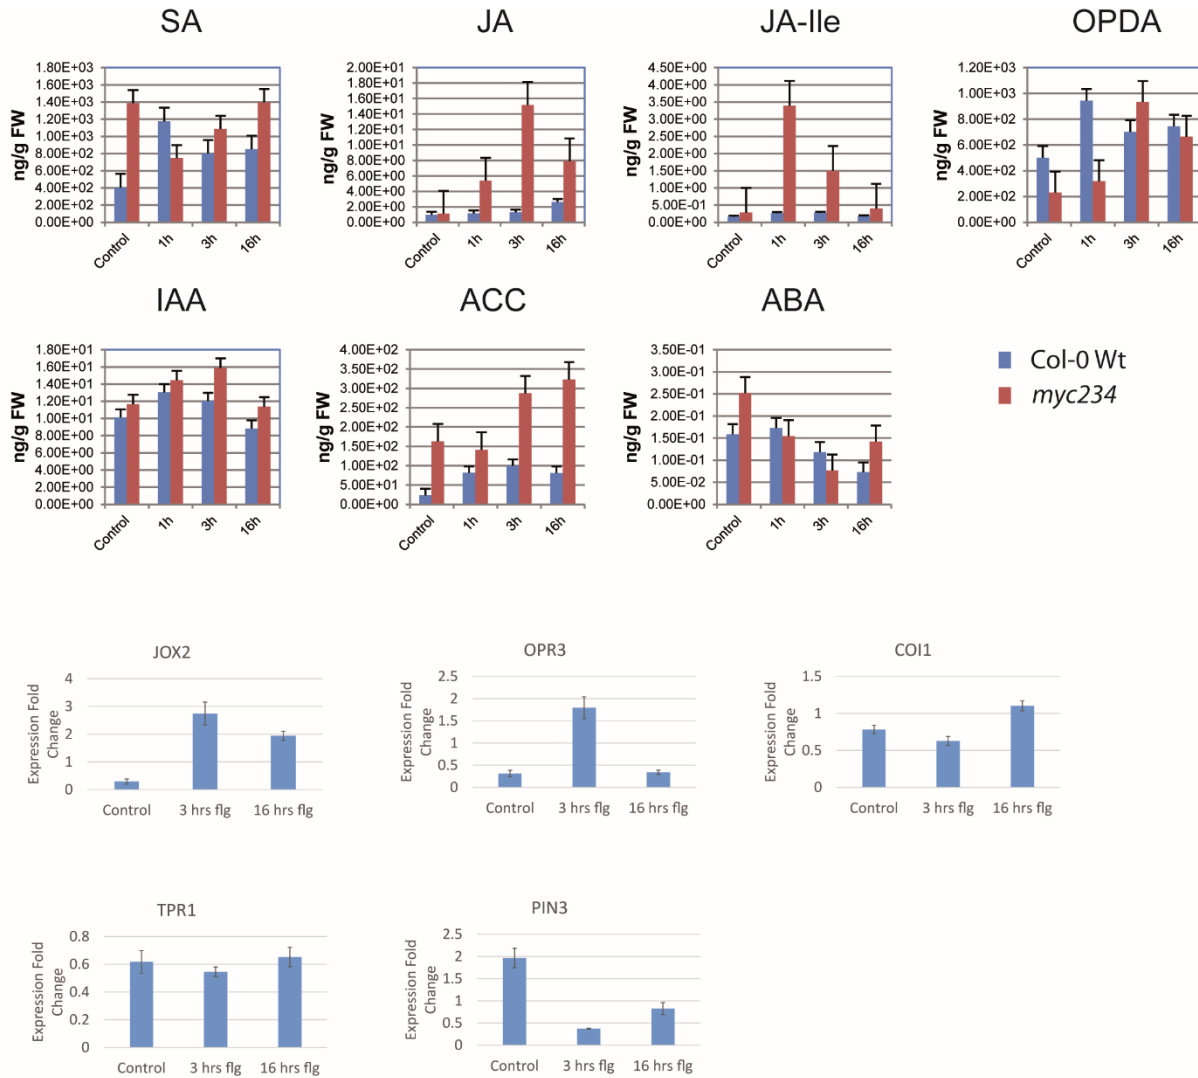

723

724 *Figure 6 Absolute quantification of phytohormones without and 1, 3 and 16 hours after flg22 exposure (1μM concentration in*  
 725 *medium) in Col-0 Wt and myc234 mutant backgrounds using GC-MS. Bars represent mean of three biological replicates;*  
 726 *standard error is given. qPCR based transcript abundance profiling of selected genes without and 3 and 6 hours after flg22*  
 727 *exposure (1μM concentration in medium). Bars represent mean of 6 measurements (3 biological replicates each measured*  
 728 *twice), standard error is given.*

729 after exposure to flg22 again reconciling initiation of JA synthesis with low JA levels by  
 730 way of hydroxylation already at the early stages of biotrophic pathogen defense. The  
 731 abundance of COI1 and TPR1 transcripts did not change markedly over time  
 732 suggesting little or no JA signaling in the absence of JA-Ile itself.

733 Finally, as we uncovered several potentially new aspects of JA synthesis and  
 734 homeostasis in PTI, we measured the abundance of the phytohormones at the same

735 time points following flg22 treatment in the *myc234* background. JASMONATE  
736 INSENSITIVE 1 (MYC2) is one of the most important transcription factors in JA  
737 signaling downstream of COI1 with a host of diverse regulatory functions and the triple  
738 knockout exhibits essentially no functional redundancy. SA hyperaccumulated in the  
739 triple KO under standard growth conditions as described previously (Nickstadt et al.,  
740 2004). Its abundance decreased markedly 0.54- and 0.78-fold 1 and 3 hours, but  
741 increased 16 hours after flg22 perception, suggesting that JA signaling plays a role in  
742 SA accumulation in PTI and that it is an early one.

743 Strikingly, JA and JA-Ile levels both greatly increased (maximum JA-Ile 12.1-fold 1 hour,  
744 JA 13.5-fold 3 hours after flg22 exposure) throughout the time course. OPDA also  
745 increased in the mutant, its profile mirroring that of JA in the wild type, reaching a  
746 maximum increase of 4-fold three hours after flg22 perception. This shows induction of  
747 JA biosynthesis pathway and synthesis of JA intermediates independently of MYC2.  
748 The highly elevated JA levels and JOX2 transcript abundance 3 hours post PAMP  
749 treatment prompted us to investigate the IAR3 and JOX2 promotor regions for MYC2  
750 binding sites and indeed two and three were identified as the top ranking hits  
751 respectively. This supports a hypothesis wherein JOX2 expression is under the control  
752 of MYC2 and wherein JA is synthesized but continuously depleted by JOX2 by way of  
753 hydroxylation in biotrophic pathogen defense. Our combined measurements represent  
754 strong evidence of a MYC2 dependent negative feedback loop controlling JA-Ile and JA  
755 levels in PTI via deconjugation and hydroxylation by IAR3 and JOX2 (Figure 7).

756 The other phytohormones showed similar levels over time in both the wild type and the  
757 mutant. The amount of free IAA did not change dramatically, increasing slightly at  
758 earlier time points and decreasing as stated above at the 16 hour time point presumably  
759 because steady state PTI is achieved. ACC/ET abundance increased already 1 hour  
760 after exposure of the seedlings to the PAMP and remained elevated. ABA decreased 3  
761 hours after flg22 treatment and remained low throughout the time course, presumably  
762 because of its known antagonism with SA (Cao et al., 2011). Additionally we measured  
763 changes in the levels of the 20 proteinogenic amino acids and some others and found



764 alanine, glycine, tryptophane and taurine to increase during the course of flg22

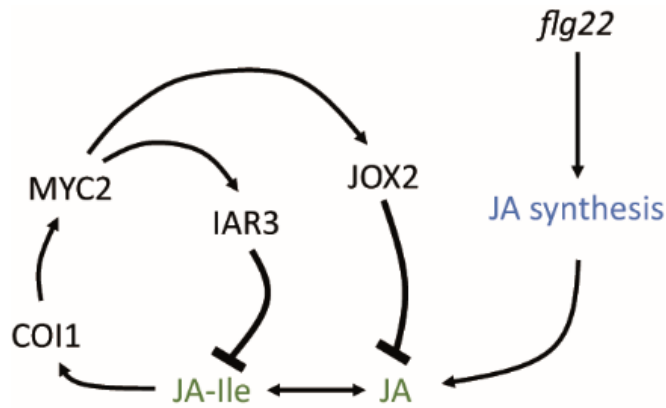

765

766 Figure 7 A MYC2 dependent negative feed-back loop controls JA-Ile and JA levels in equilibrium with JA synthesis by way of  
767 deconjugation and hydroxylation via IAR3 and JOX2 in immunity to biotrophic pathogens.

768 exposure (Supplemental figure 15). The abundance of leucine, isoleucine, lysine,  
769 proline and ornithine decreased over the time of exposure.

770

771

772 Discussion

773 Deep Proteomics Study of the *Arabidopsis thaliana* Proteome

774 In this report we describe the proteome biology of the model plant *Arabidopsis thaliana*  
775 comprehensively. We elucidated the proteome landscapes of the plant and tissues  
776 throughout its lifecycle as well as in the immune response to PAMP in unprecedented  
777 resolution and detail. Importantly we placed an emphasis on remodeling of proteome  
778 architecture between these diverse biological scenarios to extrapolate genome wide  
779 protein co-regulation and function. This approach has just recently been documented in  
780 humans (Kustatscher et al., 2019) and draws its power from deep coverage of the  
781 proteome as we have done here, quantifying close to 16,000 *Arabidopsis* proteins. In-  
782 depth sampling allowed quantitative measurement of all of the components of entire  
783 biochemical pathways such as JA synthesis in PTI, protein complex components such  
784 as RBF complexes and protein co-expression of genes in local neighborhoods such as  
785 cysteine rich kinases (CRKs), facilitating confident inference of protein abundance co-  
786 regulation and functional and temporal connections for instance in seed development

787 and dormancy, the establishment, maintenance and deconstruction of the  
788 photosynthetic machinery and in senescence and abscission. With this we alleviated an  
789 inherent weakness of most previous plant proteomics studies that were underpowered,  
790 quantifying only a few thousand proteins if at all. To do this we developed and optimized  
791 a strategy that in our hands allowed quantification of more than 9,000 proteins from a  
792 sample in 3.5 days, a duration that is acceptable for medium scale proteomics studies.

793 Despite our unprecedented sampling depth, we did not delve much deeper into the  
794 entire *Arabidopsis* proteome than Baerenfaller and co-workers (or as a matter of fact the  
795 other deep proteomics studies in plants). In their classic study published more than ten  
796 years ago individual sampling depth was modest however they utilized more than 1,300  
797 low resolution LC-MS measurements to quantify nearly 15,000 proteins. Both studies  
798 show a similar impact of transcript abundance on detection of cognate proteins (Figure  
799 2C Baerenfaller et al, Figure 1C here) however we show protein size has a more  
800 pronounced effect presumably because small proteins will generate less tryptic peptides  
801 amenable to MS detection. Also transcription factors and nuclear proteins whose  
802 expression may be highly transient and biological context specific were conspicuously  
803 overrepresented in the missing proteome (Supplemental figure 4). Capturing these  
804 proteins could require exhaustive sampling of different organs at all developmental  
805 stages (imagine par example the diversity of the 12 stages of organ development in the  
806 floral bud (Bowman et al., 1989; Smyth et al., 1990)) and environmental interactions and  
807 even then may escape detection. Indeed, the more than 8,000 proteins identified in the  
808 context of flg22 treatment did not substantially increase the amount of total proteins  
809 previously identified in the plant tissues (Figure 1F) Also proteomics ruler method  
810 allowed us to quantify proteins with less than 100 copies per cell, which is in general  
811 agreement with LOQs of modern large scale proteomics studies in humans (Bekker-  
812 Jensen et al., 2017). This suggests that even more comprehensive sampling of the  
813 *Arabidopsis thaliana* proteome may be confounding with current technologies.

814 Next to the prevalence of known artificial and biologically occurring modifications, amino  
815 acid substitutions were found to be common. Such exchanges are generally caused by  
816 ribosome infidelity, have a number of biological implications and have been reported

817 previously in human cell lines (Chick et al., 2015), human tissue (Bagwan et al., 2018)  
818 and in *E.coli* and yeast in detail (Mordret et al., 2019). The authors of the latter study  
819 define exchanges as near cognate errors (NeCE) when two of the three bases between  
820 error bearing origin and destination codon match and as non-cognate error (NoCE)  
821 when there is no such match between possible error bearing origin and destination  
822 codons. Interestingly, 5 of the 8 substitutions we found to be abundant in *Arabidopsis*  
823 (Asn->Met, Ala->Asp, Pro->Glu, Asp->Asn, Glu->Gln) were also abundant in yeast but  
824 not *E.coli*, and three (Ala->Asp, Asp->Asn, Glu->Gln) were NeCEs suggesting  
825 conserved patterns of translational error in eukaryotes, a possible method of generating  
826 random phenotype variants in genetically identical organisms (Mordret et al., 2019).  
827 This phenomenon may also highlight the limitations of searching protein databases  
828 derived from reference genomes with proteomics data.

## 829 Root and Seed Proteomes

830 The root is a highly specialized, plastic tissue that confers structural stability to the  
831 above ground portion of the plant and is responsible for the uptake of nutrients and  
832 water from the soil. Thus it exudes a number of metabolites, peptides and proteins that  
833 allow it to interact with the rhizobiome. The function of the root specific proteins in  
834 cluster 3 are well documented. Interestingly the transcription factors and proteins that  
835 pertain to hormone signaling in the developing root (Paez Valencia et al., 2016) were  
836 not overly prominent among the set of cluster proteins. Comparative evaluation of  
837 different deep proteomics studies as we have done here can be useful in defining the  
838 core set of proteins ubiquitously expressed in a cell type, tissue or organism.

839 The proteins in cluster 7 are very specific to the seed proteome. They were exclusively  
840 or significantly highly abundant in siliques only and not ubiquitously abundant in other  
841 tissues. These include many of the proteins involved in ABA dependent regulation of  
842 seed development. The amount of ABI5, a positive regulator of ABA signaling is post  
843 translationally controlled by AFP1, presumably promoting its degradation by the  
844 proteasome (Lynch et al., 2017). The high ABI5 to AFP1 ratio measured in post mature  
845 seeds indicates high ABA levels and ABI5 activity also in the induction and maintenance  
846 of dormancy. ABA and DOG1 pathways converge on PP2C phosphatases such as

847 AHG1 to suppress germination (Nee et al., 2017). DOG1 and the PP2Cs RDO5 and  
848 AHG1 were some of the most abundant measured proteins suggesting a possibly  
849 dominant role in seed dormancy by this pathway over ABA signaling. In addition two  
850 other PP2Cs (AT3G15260 and AT4G31860 of the F and I clades respectively)  
851 previously not known to be involved in seed development also accumulated to very high  
852 levels implicating them in the same processes. The abundance of RD26/ANAC72  
853 (AT4G27410) and its two closest homologs ANAC19 (AT1G52890) and ANAC03  
854 (AT3G15500) as well as two other NAC transcription factors, ANAC02 (AT3G15510)  
855 and ANAC14 (AT1G33060) increased specifically and significantly in seeds particularly  
856 in post mature seeds (brown siliques). *RD26* and homologs have been shown to be  
857 ABA responsive (Fujita et al., 2004) and to be expressed ubiquitously in *Arabidopsis*  
858 vegetative tissues in response to drought and salt stress (Tran et al., 2004; Nakashima  
859 et al., 2012) and coronatine (Zheng et al., 2012). They are also known to play a role in  
860 jasmonate (Bu et al., 2008) and brassinosteroid signaling (Ye et al., 2017) as well as  
861 leaf senescence (Takasaki et al., 2015). Given their role in promoting drought tolerance,  
862 their seed specific accumulation in the absence of stress may indicate a previously  
863 unknown role in the onset and maintenance of desiccation tolerance. No seed specific  
864 or reproductive phenotype has been reported for the respective single NAC gene  
865 knockout mutants possibly reflecting functional redundancy and to our knowledge no  
866 multiple knockout mutants have been produced.

## 867 Ribosomal Proteins in Development

868 In our study we identified a large number of RPs and RBFs that all show the same  
869 tissue and developmentally specific pattern of protein abundance, increased in young  
870 (seedling) roots, young stem and early flowers/floral buds. The deep proteome  
871 coverage of our approach allowed us to identify entire RBF protein complexes, all of  
872 whose members had the same expression pattern. The RBF complexes were part of  
873 the SSU-processome or the pre-60S pre-ribosomal particle and mutation of many of  
874 their constituent RBFs lead to aberrant gametophyte development. This suggests that  
875 particularly these complexes regulate gametophyte development in early flowers in the  
876 context of ribosome biogenesis and translation, underscored by their much more

877 conserved, significant expression pattern as opposed to ribosomal proteins in general. It  
878 has been reported that the transcripts of several of these genes are especially abundant  
879 in developing tissue such as young roots, stem and flowers (Missbach et al., 2013).  
880 Furthermore, the extensive physical interaction between RPs and RBFs with the protein  
881 abundance pattern found here may indicate these particular isoforms assemble  
882 ribosomes specific to young roots, young stem and early flowers/floral buds with  
883 possible function specific to these tissue states. Closer inspection of the protein  
884 interactions may also bring to light new RBFs and RP/RBF complex conformations that  
885 have not yet been described. Indeed, although the complexes detected here are well  
886 described in yeast, much of what is known in *Arabidopsis* is by inference, so this study  
887 presents evidence of their tissue specific expression on the protein level, particularly  
888 pertaining to the CCT complex.

889 ABI5 is a positive regulator of ABA signaling that has been shown to repress the  
890 flowering transition (Wang et al., 2013) next to its well documented function in the  
891 induction and maintenance of seed dormancy (Finkelstein et al., 2008). So far a handful  
892 of proteins have been reported to target ABI5 to degradation and thus negatively impact  
893 the ABA response, including AFP1 (Lopez-Molina et al., 2003) and DWA2 (Lee et al.,  
894 2010). Both had distinct abundance patterns in this study. AFP1 was most abundant in  
895 ripe brown siliques (see above). DWA2 abundance was elevated in young roots, young  
896 stem and early flowers/floral buds wherein it presumably mediates ABI5 degradation to  
897 induce flowering. These results suggest different developmental and tissue specific  
898 mechanisms post-translationally control ABI5 levels and ABA activity.

### 899 Vesicle Trafficking

900 Interestingly many of the membrane trafficking cluster 13 proteins were abundant in  
901 both fast growing tissues, primarily roots but also stem and flowers and senescent  
902 leaves. Vesicle trafficking is preeminent in the targeted deposition of new cell wall  
903 material in the clear zone at the apex of tip growing cells as is the formation of an apical  
904 actin structure. Autophagy, which also involves transport of cytoplasmic components in  
905 membrane vesicles is important in senescence, both in counteracting premature cell  
906 death and degradation of cellular structures such as the photosynthetic apparatus in

907 nutrient remobilization. Our results at least suggest, that some of the molecular players  
908 in these distinct processes in different organs may be the same.

#### 909 Photosynthesis

910 The tissue and developmental abundance profile of cluster 11 proteins implicates them  
911 in chloroplast biogenesis and indeed, large sets of interacting proteins as well as known  
912 individual proteins central to its molecular processes were the major constituents of this  
913 cluster. These processes are known to be most prevalent in the young plant. The  
914 proteins of the photosynthetic apparatus are abundant in green tissues in nearly all  
915 developmental stages beginning in the cotyledons of the young seedling prior to  
916 photoautotrophy. This can be seen in the abundance profile of the proteins in cluster 8  
917 which decreases in leaves in the later senescent stages, concomitantly with an increase  
918 of proteins that facilitate disassembly of the apparatus and pigment degradation in  
919 cluster 10.

#### 920 Senescence and Abscission

921 As such it is no surprise that a large number of antioxidant proteins and proteins  
922 involved in redox regulation and ROS scavenging increased in abundance as ageing  
923 progressed, peaking in senescence in leaves, cauline leaves and flowers/siliques.  
924 Chlorophyll and carotenoid catabolism are central aspects of leaf senescence and  
925 CYP89A9 is important in this respect catalyzing the oxidative deformylation of FCCs to  
926 dioxibilin-type FDCCs and ultimately the accumulation of NDCCs (Christ et al., 2013).  
927 CYP89A2 has been shown to be co-expressed with CYP89A9 (Obayashi et al., 2009)  
928 and we have observed this here for the cognate proteins. In addition to these two, 10  
929 other CYP71 clan members had the same protein abundance pattern of cluster 10. This  
930 makes it likely, that a larger number of CYPs play undescribed roles in chlorophyll  
931 catabolism, as was also speculated by Christ and co-workers.

932 We detected 6 CRKs showing the characteristic abundance pattern associated with  
933 senescence. This RLK gene family consists of 44 members all in close proximity on  
934 chromosome 4 with a host of different physiological functions (Wrzaczek et al., 2010;  
935 Burdiak et al., 2015). Their extracellular regions have two conserved DUF domains



936 each with 4 cysteine residues as potential targets for thiol redox regulation. Members of  
937 the gene family have been shown to be expressed on the transcript and protein level in  
938 response to pathogen challenge, flg22 and SA, underpinning a potential role in  
939 immunity (Wrzaczek et al., 2010; Yadeta et al., 2017). Transcripts of five of the six  
940 CRKs we identified were also significantly upregulated following ozone treatment  
941 (Wrzaczek et al., 2010). Collectively these processes as well as senescence all involve  
942 ROS, although the spatio-temporal mechanisms of ROS production, interaction and  
943 signaling in the senescence syndrome are not well understood. A probable ROS  
944 dependent role of CRK5 in cell death and senescence is documented (Burdiak et al.,  
945 2015). Our results further support an as of yet little known role of the CRKs in  
946 senescence. Considering CRKs as ROS sensors and signaling molecules leads to the  
947 question of chloroplast derived ROS production affecting the extra-cellular redox state  
948 akin to the oxidative burst upon pathogen perception.

949 *Arabidopsis* floral organ abscission as the culmination of petal senescence and nutrient  
950 remobilization for fruit ripening and ultimately release is a well-studied model of general  
951 abscission processes (Patharkar and Walker, 2018). Here we detected most of the  
952 components of the abscission signaling cascade increasing in abundance in flowers as  
953 they age and set seeds in siliques following fertilization. Recently it has been shown that  
954 the same mechanisms also act in *Arabidopsis* cauline leaf abscission in response to  
955 drought (Patharkar and Walker, 2016) and indeed it is common that plants shed their  
956 leaves in response to various environmental stimuli. However, leaf abscission is not  
957 known to be on a developmental clock and *Arabidopsis* does not abscise rosette leaves  
958 (Stenvik et al., 2006), making it intriguing that we also found the abundance of the  
959 proteins to increase in both rosette and cauline leaves in the course of ageing and  
960 senescence.

961 ABA plays a major role in fruit ripening (Jia et al., 2011) and the leaf senescence  
962 syndrome (Song et al., 2016), yet its role in abscission is debated. ABA promotes  
963 ethylene biosynthesis during the later stages of fruit ripening in tomato (Zhang et al.,  
964 2009) and ethylene is known to be a regulator of abscission in *Arabidopsis* (Patterson  
965 and Bleecker, 2004). The hormone is also a key factor in the response to drought



966 (Huang et al., 2008). *HAE*, *HLS2* and *IDA* expression in *Arabidopsis* seedlings is  
967 induced by ABA and to a lesser extent ethylene (eFP browser (Goda et al., 2008)). It is  
968 possible, that the elevated ABA and ethylene levels in the course of senescence led to  
969 the accumulation of the abscission signaling proteins in rosette and cauline leaves.  
970 Therefore one may speculate on possible other yet unknown functions of this signaling  
971 module outside of organ abscission.

## 972 Photosynthesis and Primary Metabolism in PTI

973 It is known that pathogen infection leads to inhibition of photosynthesis and it has been  
974 shown that this is an active response of the plant to the invading pathogen.

975 Downregulation of a host of genes related to the light dependent reaction and  
976 particularly photosystem II and parameters of photosynthetic activity has recently been  
977 reported to be dependent on constitutive MPK3/MPK6 activation in ETI (Su et al., 2018).

978 The resulting increase in chloroplast localized ROS is hypothesized to support the  
979 programmed cell death in the hypersensitive response (HR). Measurement of the  
980 photosynthetic parameters upon exposure to 100 nM flg22 for up to 24 hours or  
981 infiltration with a *Pseudomonas syringae pv tomato DC3000* (*Pst* DC3000) strain that  
982 lacks a type III secretion system to deliver effectors in this study indicated that  
983 downregulation of photosynthesis does not occur in PTI, which feature only transient  
984 MPK3/MPK6 activation. An older proteomics study however discloses downregulation of  
985 some photosynthetic proteins and non-photochemical quenching (NPQ) 2 hours after  
986 flg22 treatment (100 nM to 10  $\mu$ M) and decrease of electron flux through PSII upon 7  
987 days of exposure, suggesting inhibition of photosynthesis may occur in some PTI  
988 scenarios (Gohre et al., 2012). This is in line with our findings where plants were  
989 exposed to 1  $\mu$ M flg22 for sixteen hours. Conceivably higher flg22 doses may lead to  
990 prolonged MPK3/MPK6 activation and photosynthetic inhibition also in PTI. As an  
991 afterthought, the abundance of both MPK3 and MPK6 increased somewhat in the  
992 discovery proteomics results (Supplemental table 14) upon PAMP exposure although  
993 we did not measure phosphorylation levels.

## 994 Jasmonate and Salicylic Acid Cross Talk

995 The induction of PTI downstream of FLS2 binding flg22 is a commonly accepted model  
996 of bacteria induced basal immunity in plants. As the majority of bacteria adopt biotrophic  
997 lifestyles, it can also be considered a model of plant resistance to biotrophs although not  
998 exclusively, as some bacteria, such as *Erwinia carotovora* are necrotrophs. Also bacteria  
999 will be recognized by more than one pattern recognition receptor (PRR) such as EF-TU  
1000 RECEPTOR (EFR) and others in addition to FLS2, inducing multiple partially  
1001 overlapping responses, so the flg22/FLS2 model may be overly specific and somewhat  
1002 artificial.

1003 The importance of SA and JA in resistance to biotrophs and necrotrophs respectively as  
1004 well as their generally antagonistic modes of action are well documented (Pieterse et  
1005 al., 2012). It has also been shown that both hormones interact and play roles in flg22  
1006 induced PTI (Denoux et al., 2008; Yi et al., 2014; Hillmer et al., 2017; Mine et al., 2017).  
1007 Our results suggests flg22 induced PTI at the steady state of 16 hours after continuous  
1008 flg22 exposure prioritizes SA mediated defenses over JA mediated defenses because  
1009 of dampening of JA and JA-Ile accumulation in culture grown seedlings. SA has been  
1010 shown to accumulate in and be essential for flg22 triggered defenses (Tsuda et al.,  
1011 2008). The suppressive effect of SA on JA levels has been extensively explored and  
1012 shown to be NPR1 dependent in *Pst* DC3000 infected *Arabidopsis* plants (Spoel et al.,  
1013 2003) and integral to the trade-off between defense against biotrophic and necrotrophic  
1014 pathogens (Spoel et al., 2007). However most of this interplay is downstream of JA  
1015 synthesis at the level of inhibition of JA responsive gene transcription by transcriptional  
1016 regulators primarily WRKY70 and TGAs and ORA59 (Li et al., 2004; Leon-Reyes et al.,  
1017 2010; Shim et al., 2013; Van der Does et al., 2013; Zander et al., 2014). Here we  
1018 propose a model wherein a MYC2 dependent negative feed-back loop in equilibrium  
1019 with JA synthesis controls JA-Ile and JA levels via clearance of the phytohormones by  
1020 deconjugation and hydroxylation by IAR3 and JOX2 respectively. Four major arguments  
1021 for this model can be extrapolated from our measurements.

1022 1. JA and JA-Ile levels were very low and did not increase significantly following  
1023 flg22 exposure in the wild type. However, the abundance of all of the proteins in  
1024 the JA synthesis pathway and of the OPR3 transcript was significantly increased

1025 after induction of PTI (16 and 3 hours respectively). It has been reported, that JA  
1026 biosynthesis and signaling gene expression was upregulated in *Arabidopsis* at  
1027 earlier time points (1h and 3h) following flg22 exposure (Denoux et al., 2008).  
1028 The OPR3 transcript levels were again basal 16 hours post flg22 perception  
1029 whereas protein abundance was still elevated, highlighting the importance of  
1030 measuring protein levels directly.

- 1031 2. Absolute levels of the JA intermediate OPDA were very high ( $\mu\text{g/g}$  FW) and  
1032 increased more than 4-fold following treatment with the PAMP in both the wild  
1033 type and the *myc234* background.
- 1034 3. JA and JA-Ile levels were strongly elevated in the *myc234* mutant as opposed to  
1035 the wild type. This indicates suppression of the phytohormone and its bioactive  
1036 conjugate is dependent on MYC2 in PTI. Moreover, this result together with point  
1037 3. above leads us to doubt that arrest of the JA synthesis pathway at the point of  
1038 OPDA synthesis is the reason for the basal JA and JA-Ile levels. Also OPDA  
1039 REDUCTASE 3 (OPR3) which reduces OPDA was the pathway component with  
1040 the greatest fold change in abundance.
- 1041 4. The amidohydrolase IAR3 and the 2OG oxygenase JOX2 were among the  
1042 proteins with the most significantly increased fold change in abundance following  
1043 16 hours of flg22 exposure. The same goes for the JOX2 transcript after three  
1044 hours. MYC2 binding sites were identified as the top scoring motifs in *in silico*  
1045 analysis of both the JOX2 and IAR3 promotor regions. These proteins  
1046 deconjugate JA-Ile and hydroxylate free JA respectively, thereby inactivating the  
1047 former as well as depleting both of them.

1048 These results lead us to hypothesize that deconjugation and subsequent modification of  
1049 JA-Ile play an important role in control of the JA pathway in defense against biotrophs  
1050 as has been shown against the necrotrophic fungus *Botrytis cinerea* (Caarls et al.,  
1051 2017). JA/JA-Ile clearance is presumably in some type of equilibrium with JA synthesis  
1052 because it has been reported that the JA pathway is party to PTI induction and SA  
1053 accumulation via EDS5 (Mine et al., 2017). The involvement of JA signaling in SA  
1054 accumulation is underscored in our data by the diminished SA levels in the *myc234*  
1055 background at the earlier time points (1h and 3h after flg22 exposure). Thus our model

1056 reconciles significant induction of the JA synthesis pathway proteins and known SA JA  
1057 antagonism at the level of transcriptional regulation with the low observed JA and JA-Ile  
1058 levels we measured and which were reported previously (Spoel et al., 2003).

#### 1059 Auxin/IAA homeostasis

1060 Auxins are among the most studied phytohormones and next to their preeminent role in  
1061 growth and development have established functions in plant immunity. Free IAA and  
1062 IAA signaling both increase plant susceptibility to biotrophic pathogens (Kunkel and  
1063 Harper, 2018) whereas IAA acts synergistically with JA in resistance to necrotrophic  
1064 pathogens (Qi et al., 2012). Flg22 induces transcription of a microRNA miR393 that  
1065 targets the auxin receptor TRANSPORT INHIBITOR RESPONSE 1 (TIR1), thereby  
1066 dampening auxin signaling (Navarro et al., 2006). Free IAA levels were not reported to  
1067 change dramatically in response to flg22 (Navarro et al., 2006) nor to *PStDC3000*  
1068 infection or SA (Qi NewPhytol 2012) and we also observed a slight but significant  
1069 decrease after 16 hours of exposure, presumably by downregulation of the IAM  
1070 pathway indicated by a decrease in the abundance of AMIDASE1 (AMI1) when steady  
1071 state PTI is reached. IAA is synthesized primarily from tryptophan by way of several  
1072 biosynthesis pathways and tryptophan also channels into defense compound synthesis,  
1073 especially indolic glucosinolates and camalexin. Thus branching points in  
1074 tryptophan/IAA biosynthesis pathways, particularly indole-3-acetaldoxime (IAOx)  
1075 (Sugawara et al., 2009) may represent an important nexus in the growth defense trade  
1076 off. Here we measured substantial, significant increase in protein abundance in the  
1077 entire tryptophan as well as in defense compound biosynthesis pathways in response to  
1078 flg22. The abundance of enzymes (AAO1, NIT1 and NIT4) in some alternative auxin  
1079 synthesis pathways with known secondary roles in defense also increased.

1080 It is known that JA induces these pathways upon *Alternaria brassicicola* infection also  
1081 leading to increase in free IAA levels in the response to necrotrophic pathogens (Qi et  
1082 al., 2012). In our study JA and JA-Ile levels remained basal. However, we measured a  
1083 significant increase in the abundance of ethylene biosynthesis proteins ACC OXIDASE  
1084 2 (ACO2) and 1-AMINO-CYCLOPROPANE-1-CARBOXYLATE SYNTHASE 7 (ACS7)  
1085 and a significant, more than 5-fold increase of ET 16 hours after PAMP exposure. Clay

1086 and co-workers reported expression of tryptophan and IG biosynthesis pathway  
1087 transcripts to be mediated by ET via myb transcription factors. These pathways play  
1088 important roles in defense against both biotrophic and necrotrophic pathogens and our  
1089 results suggest that they are induced independently by different phytohormones, ET  
1090 and JA respectively. These two hormones are generally synergistic posing new  
1091 questions about the role of JA in the flg22 response.

1092 Auxins are unique among phytohormones in that they are transported directionally from  
1093 cell to cell by a polar transport system with many components (Friml, 2003). Indeed, the  
1094 distribution and local IAA concentration have a profound impact on cellular processes  
1095 more so than absolute IAA levels or aspects of synthesis and catabolism (Teale et al.,  
1096 2006) and auxin transport mutants have been reported to be defective in mounting SAR  
1097 (Truman et al., 2010b). Concurrently, we did not observe major changes in free IAA  
1098 levels, however the abundance of two of the most well studied auxin efflux carriers,  
1099 PIN3 and PIN7, decreased and that of a protein directing the localization of the influx  
1100 carrier AUX1 increased after flg22 exposure. This suggests that IAA transport and local  
1101 IAA gradients also play an important role in the defense against biotrophic in addition to  
1102 necrotrophic pathogens (Qi et al., 2012).

1103

1104

## 1105 Methods Summary

1106 For detailed description of methods and optimization see Supplemental Methods and  
1107 Data. In brief, proteins were extracted from *Arabidopsis thaliana* suspension cultures or  
1108 soil grown plants and tissues with 4% SDS, separated into 5 bands by SDS-PAGE, in  
1109 gel digested and measured on an Orbitrap Velos Pro mass spectrometer with a  
1110 conventional DDA scan strategy using a 50 cm C18 liquid chromatography column and  
1111 an extended gradient of 9 hours. MS data was searched using the Mascot and  
1112 Andromeda search engines. Search results were concatenated and peptides and  
1113 proteins identified with global FDR thresholds of 0.01 in the Scaffold software. Proteins  
1114 were quantified by way of PSM counting. For parallel reaction monitoring (PRM)

1115 proteins were extracted with 4% SDS, digested with an optimized FASP protocol and  
1116 peptides measured on a QExactive Plus mass spectrometer. Up to three proteotypic  
1117 peptide m/z per protein were targeted, peptides and proteins were identified using the  
1118 Mascot search engine and data analysis and AUC quantification of 6 fragment ions was  
1119 done using the Skyline software. Statistical significance of protein fold changes was  
1120 inferred at a threshold of 0.05 if one of the quantified peptides tested significant. qPCR  
1121 was performed with the EvaGreen Kit from Bio&Sell according to manufacturer's  
1122 instructions, phytohormone and amino acid measurements according to (Ziegler et al.,  
1123 2014). Bioinformatics analysis including gene ontology analysis and pathway  
1124 visualization and mapping was done with DAVID, MapMan, STRING; PTM analysis with  
1125 MSFragger. Multivariate data analysis was done in case of fuzzy c-means clustering  
1126 with the m-fuzz R package, hierarchical clustering and PCA with Perseus. Co-  
1127 expression of proteins from neighboring genes was analyzed using an in-house  
1128 program programmed in R.

1129

1130

### 1131 Supplemental Figure Legends

1132 Supplemental figure 1. Sampling of different *Arabidopsis thaliana* tissues and seedlings  
1133 at various stages in the plants life (in days). Samples correspond to Supplemental  
1134 methods and data tables 1 and 2.

1135 Supplemental figure 2. Experiments to optimize GeLC-MS approach for deep  
1136 proteomics analysis of plant tissues A. Total amount of extracted proteins and  
1137 concentration of proteins in solution for various tissue amounts and tissue to buffer  
1138 ratios using the SDS based protein extraction described in this work. For 250 mg / 750  
1139  $\mu$ l and 250 mg / 1000  $\mu$ l mean values and standard deviations (error bars) of four  
1140 experiments are shown, for 500 mg / 500  $\mu$ l, 500 mg / 750  $\mu$ l and 250 mg / 500  $\mu$ l of  
1141 eight and for 500 mg / 1000  $\mu$ l of 18 experiments are shown. For phenol extraction (500  
1142 mg / 1000  $\mu$ l) mean values and standard deviations of six experiments are shown. B.  
1143 Number of proteins identified (Mascot, no significance filters) in bands 1 through 5 and



1144 in total (cumulative sum of all bands) employing a 180 minute LC gradient when loading  
1145 different amounts of phenol extracted proteins onto the SDS-PAGE as compared to 40  
1146  $\mu\text{g}$  of SDS extracted proteins. Mean values and standard errors of 2 experiments are  
1147 shown for Phenol 40  $\mu\text{g}$  C. Number of proteins identified (Mascot, no significance filters)  
1148 in bands 1 through 5 and in total (cumulative sum of all bands) employing a 180 minute  
1149 LC gradient when separating 80  $\mu\text{g}$  of SDS extracted proteins over different distances in  
1150 SDS-PAGE. Mean values and standard errors of 2 experiments are shown for 2.5 cm  
1151 SDS-PAGE. D. Number of proteins identified (Mascot, no significance filters) in bands 1  
1152 through 5 and in total (cumulative sum of all bands) employing a 180 minute LC  
1153 gradient when separating different amounts of SDS extracted proteins for 2.5 cm on  
1154 SDS-PAGE. Mean values and standard errors of 3 experiments are shown for 40  $\mu\text{g}$   
1155 and 80  $\mu\text{g}$  of SDS extracted proteins. Only band 1 was measured for 10  $\mu\text{g}$ , 20  $\mu\text{g}$  and  
1156 240  $\mu\text{g}$  of SDS extracted proteins. E. Number of proteins identified (Mascot, no  
1157 significance filters) in bands 1 through 5 and in total (cumulative sum of all bands)  
1158 employing a 180 minute LC gradient when separating 80  $\mu\text{g}$  of SDS extracted proteins  
1159 for 2.5 cm on 12% and 16% SDS-PAGE.

1160 Supplemental figure 3. GeLC-MS approach for deep proteomics analysis of plant  
1161 tissues A. SDS extracted plant protein extract is separated on a 12% SDS-PAGE for a  
1162 total distance of exactly 2.5 cm. High staining intensity bands are excised and analyzed  
1163 separately leading to 5 protein fractions. Contaminants such as secondary metabolites,  
1164 chromophoric compounds and leaf pigments (colored green) precede the proteins and  
1165 can be readily eliminated. B. Proteins are fractionated in the gel bands according to  
1166 their size. Box plots show molecular weight (Mw) of all proteins identified with at least  
1167 one unique peptide and a peptide FDR threshold (q-value) < 1% with the Mascot  
1168 software linked to Proteome Discoverer from 8 green tissue samples (LF7, LF10, LF40,  
1169 LF66, LF73, JLF66, JLF73, JLF90; see Supplementary Methods and Data for  
1170 explanation) in the respective bands. Boxes represent the inter-quartile range (IQR)  
1171 between the first and third quartile. Whiskers extend up to 1.5\*IQR plus the third quartile  
1172 and down to first quartile minus 1.5\*IQR. C. Highly abundant leaf proteins involved in  
1173 photosynthesis are fractionated. Mean number of peptide spectral matches (#PSMs)  
1174 identified as above for the 8 green tissues samples as above are plotted for each of the

1175 indicated proteins as a percentile of the total PSMs of all proteins per band. Error bars  
1176 indicate standard errors (SE). D. As C. for two root samples R7 and R10 (see  
1177 Supplementary Methods and Data for explanation). E. Between 6,000 and 9,000  
1178 proteins and 35,000 and 65,000 unique peptides were identified with a peptide and  
1179 protein q-value < 1% with the Mascot and MaxQuant software integrated in the Scaffold  
1180 software per tissue sample. Box plots show protein and peptide numbers from all 23  
1181 samples; otherwise as above. F. Protein identification and quantification is repeatable.  
1182 Principal component analysis of two repeated GeLC-MS analyses of flowering stage 4  
1183 sample (FF4) and FF3 and JLF3 samples. The two principal components capture more  
1184 than 96% of the total variance indicating the two dimensional subspace almost perfectly  
1185 represents the relationship of the higher dimensional samples. G. Protein identification  
1186 and quantification is repeatable. Pair wise scatter plots of the four samples in F.  
1187 Pearson correlation coefficients are given.

1188 Supplemental figure 4. DAVID Missing and Covered GO terms. Gene ontology  
1189 classification of all proteins identified in the study, the “covered” Arabidopsis proteins  
1190 and of all remaining protein coding genes for which no cognate peptide was identified,  
1191 the “missing” proteome. The percentage of the respective proteome is given for each  
1192 GO bin as well as the Benjamini corrected p-value for enrichment.

1193 Supplemental figure 5. Hierarchical cluster analysis of the deep proteomics  
1194 measurements of sampled tissues. Row tree was generated using Spearman  
1195 correlation, column tree using Pearson correlation. Values were z-score transformed so  
1196 color gradient goes from -3 (dark blue) to 0 (mean value; black) to 4 (bright red).

1197 Supplemental figure 6. All cluster 4 proteins STRING physical interactions. Physical  
1198 protein interaction networks produced with STRING database of all cluster 4 proteins.  
1199 Thick blue edges highlight the UTP-B, t-UTP complexes, thick yellow edges the PeBoW  
1200 complex. Red underlines indicate gene deletion has a developmental phenotype.  
1201 Ribosomal core complexes are color coded.

1202 Supplemental figure 7. Significance of RBF complex protein co-expression. A 95%  
1203 confidence interval was calculated for the mean expression value of RBF complex  
1204 proteins in cluster 4 and all ribosomal proteins and ribosome constituents as

1205 background. To assess the significance of RBF protein tissue and developmental  
1206 specific expression according to the cluster 4 expression pattern, the number of times  
1207 the expression value for samples R7, R10, SF66 and FF66 were outside the interval  
1208 were counted for each protein and divided by the number of expression values of all  
1209 samples that were outside of the interval. A ratio of 1 indicates only the 4 samples  
1210 mentioned above were significantly removed from the mean, indicating 95% confidence  
1211 in protein expression specific to these tissues and developmental stages, as found for  
1212 many of the RBFs (red bars). Ribosomal proteins in blue had much lower ratios  
1213 indicating expression values in more diverse tissues and developmental stages were  
1214 significantly removed from the mean and therefore alternate and non-specific  
1215 expression patterns.

1216 Supplemental figure 8. Cluster 11 proteins Chloroplast. Complete physical / functional  
1217 protein interaction network generated with the STRING database using all proteins  
1218 assigned to the GOTERM category chloroplast (Supplemental table 11) as input set.  
1219 Proteins are labelled.

1220 Supplemental figure 9. Cluster 8 proteins Stroma. Complete physical / functional protein  
1221 interaction network generated with the STRING database using all proteins assigned to  
1222 the GOTERM category Stroma (Supplemental table 12) as input set. Proteins are  
1223 labelled.

1224 Supplemental figure 10. Cluster 8 proteins Thylakoid. Complete physical / functional  
1225 protein interaction network generated with the STRING database using all proteins  
1226 assigned to the GOTERM category Thylakoid (Supplemental table 12) as input set.  
1227 Proteins are labelled.

1228 Supplemental figure 11. Cluster 8 proteins Carbon fixation. Complete physical /  
1229 functional protein interaction network generated with the STRING database using all  
1230 proteins assigned to the GOTERM category Carbon metabolism (C Metabolism)  
1231 (Supplemental table 12) as input set. Proteins are labelled.

1232 Supplemental figure 12. Cluster 8 proteins Stroma. Complete physical / functional  
1233 protein interaction network generated with the STRING database using all proteins

1234 assigned to the GOTERM category Photosynthesis (Supplemental table 12) as input  
1235 set. Proteins are labelled.

1236 Supplemental figure 13. Flg22 MapMan. The MapMan software was used to  
1237 characterize and map proteins with changes in their abundance following 16 hours of  
1238 flg22 treatment to various avenues of plant immunity. The PTI pathway was drawn by  
1239 ourselves and populated with a mapping concatenating the the MapMan Affymetrix  
1240 mapping depicted on the pathway and related to PTI with corresponding GO terms from  
1241 the TAIR GO slim ontology. Protein abundance is shown as the sum of z-score  
1242 transformed spectral counts acquired for the respective proteins in measurements of  
1243 flg22 treated 7 and 10 day old liquid culture grown seedlings. Red indicates an increase  
1244 in abundance blue a decrease (black is no change). Max and minimum values in the  
1245 color bar are 1.8 and – 1.8 respectively.

1246 Supplemental figure 14. Targeted PRM based quantification of proteins involved in  
1247 photosynthesis and primary metabolism. Bars represent log<sub>2</sub> fold changes of protein  
1248 abundance after 16 hours of flg22 exposure (1µM concentration in medium) estimated  
1249 by area under the curve label free protein quantification index (PQI) of the 6 most  
1250 intense product ions from MS2 spectra of targeted proteotypic peptides. Bars represent  
1251 median PQI of all quantified proteotypic peptides for a given protein in 9 measurements  
1252 (3 biological replicates each measured 3 times). Standard error is indicated. Star  
1253 indicates significance  $\alpha=0.05$  if fold change of at least one of the quantified peptides  
1254 was significant.

1255 Supplemental figure 15. Absolute quantification of amino acids without and 1, 3 and 16  
1256 hours after flg22 exposure (1µM concentration in medium) in Col-0 Wt and *myc234*  
1257 mutant backgrounds using GC-MS. Bars represent mean of three biological replicates;  
1258 standard error is given.

1259

1260 References

- 1261 **Agarwal, P., Kapoor, S., and Tyagi, A.K.** (2011). Transcription factors regulating the progression of  
1262 monocot and dicot seed development. *Bioessays* **33**, 189-202.
- 1263 **Ahn, C.S., Cho, H.K., Lee, D.H., Sim, H.J., Kim, S.G., and Pai, H.S.** (2016). Functional characterization of  
1264 the ribosome biogenesis factors PES, BOP1, and WDR12 (PeBoW), and mechanisms of defective  
1265 cell growth and proliferation caused by PeBoW deficiency in Arabidopsis. *J Exp Bot* **67**, 5217-  
1266 5232.
- 1267 **Baerenfaller, K., Grossmann, J., Grobei, M.A., Hull, R., Hirsch-Hoffmann, M., Yalovsky, S.,**  
1268 **Zimmermann, P., Grossniklaus, U., Gruissem, W., and Baginsky, S.** (2008). Genome-scale  
1269 proteomics reveals Arabidopsis thaliana gene models and proteome dynamics. *Science* **320**,  
1270 938-941.
- 1271 **Bagwan, N., Bonzon-Kulichenko, E., Calvo, E., Lechuga-Vieco, A.V., Michalakopoulos, S., Trevisan-**  
1272 **Herraz, M., Ezkurdia, I., Rodriguez, J.M., Magni, R., Latorre-Pellicer, A., Enriquez, J.A., and**  
1273 **Vazquez, J.** (2018). Comprehensive Quantification of the Modified Proteome Reveals Oxidative  
1274 Heart Damage in Mitochondrial Heteroplasmy. *Cell Rep* **23**, 3685-3697 e3684.
- 1275 **Bekker-Jensen, D.B., Kelstrup, C.D., Batth, T.S., Larsen, S.C., Haldrup, C., Bramsen, J.B., Sorensen, K.D.,**  
1276 **Hoyer, S., Orntoft, T.F., Andersen, C.L., Nielsen, M.L., and Olsen, J.V.** (2017). An Optimized  
1277 Shotgun Strategy for the Rapid Generation of Comprehensive Human Proteomes. *Cell Syst* **4**,  
1278 587-+.
- 1279 **Bigeard, J., Colcombet, J., and Hirt, H.** (2015). Signaling mechanisms in pattern-triggered immunity (PTI).  
1280 *Mol Plant* **8**, 521-539.
- 1281 **Bleecker, A.B., and Patterson, S.E.** (1997). Last exit: senescence, abscission, and meristem arrest in  
1282 Arabidopsis. *Plant Cell* **9**, 1169-1179.
- 1283 **Boudsocq, M., Willmann, M.R., McCormack, M., Lee, H., Shan, L., He, P., Bush, J., Cheng, S.H., and**  
1284 **Sheen, J.** (2010). Differential innate immune signalling via Ca(2+) sensor protein kinases. *Nature*  
1285 **464**, 418-422.
- 1286 **Bowman, J.L., Smyth, D.R., and Meyerowitz, E.M.** (1989). Genes directing flower development in  
1287 Arabidopsis. *Plant Cell* **1**, 37-52.
- 1288 **Breeze, E., Harrison, E., McHattie, S., Hughes, L., Hickman, R., Hill, C., Kiddle, S., Kim, Y.S., Penfold,**  
1289 **C.A., Jenkins, D., Zhang, C., Morris, K., Jenner, C., Jackson, S., Thomas, B., Tabrett, A., Legaie,**  
1290 **R., Moore, J.D., Wild, D.L., Ott, S., Rand, D., Beynon, J., Denby, K., Mead, A., and Buchanan-**  
1291 **Wollaston, V.** (2011). High-resolution temporal profiling of transcripts during Arabidopsis leaf  
1292 senescence reveals a distinct chronology of processes and regulation. *Plant Cell* **23**, 873-894.
- 1293 **Bu, Q., Jiang, H., Li, C.B., Zhai, Q., Zhang, J., Wu, X., Sun, J., Xie, Q., and Li, C.** (2008). Role of the  
1294 Arabidopsis thaliana NAC transcription factors ANAC019 and ANAC055 in regulating jasmonic  
1295 acid-signaled defense responses. *Cell Res* **18**, 756-767.
- 1296 **Burdiak, P., Rusaczonek, A., Witon, D., Glow, D., and Karpinski, S.** (2015). Cysteine-rich receptor-like  
1297 kinase CRK5 as a regulator of growth, development, and ultraviolet radiation responses in  
1298 Arabidopsis thaliana. *J Exp Bot* **66**, 3325-3337.
- 1299 **Byrne, M.E.** (2009). A role for the ribosome in development. *Trends Plant Sci* **14**, 512-519.
- 1300 **Caarls, L., Elberse, J., Awwanah, M., Ludwig, N.R., de Vries, M., Zeilmaker, T., Van Wees, S.C.M.,**  
1301 **Schuurink, R.C., and Van den Ackerveken, G.** (2017). Arabidopsis JASMONATE-INDUCED  
1302 OXYGENASES down-regulate plant immunity by hydroxylation and inactivation of the hormone  
1303 jasmonic acid. *Proc Natl Acad Sci U S A* **114**, 6388-6393.
- 1304 **Cao, F.Y., Yoshioka, K., and Desveaux, D.** (2011). The roles of ABA in plant-pathogen interactions. *J Plant*  
1305 *Res* **124**, 489-499.

- 1306 **Chen, C.N., Chen, H.R., Yeh, S.Y., Vittore, G., and Ho, T.H.** (2009). Autophagy is enhanced and floral  
1307 development is impaired in AthVA22d RNA interference Arabidopsis. *Plant Physiol* **149**, 1679-  
1308 1689.
- 1309 **Chi, H., Liu, C., Yang, H., Zeng, W.F., Wu, L., Zhou, W.J., Wang, R.M., Niu, X.N., Ding, Y.H., Zhang, Y.,**  
1310 **Wang, Z.W., Chen, Z.L., Sun, R.X., Liu, T., Tan, G.M., Dong, M.Q., Xu, P., Zhang, P.H., and He,**  
1311 **S.M.** (2018). Comprehensive identification of peptides in tandem mass spectra using an efficient  
1312 open search engine. *Nat Biotechnol*.
- 1313 **Chick, J.M., Kolippakkam, D., Nusinow, D.P., Zhai, B., Rad, R., Huttlin, E.L., and Gygi, S.P.** (2015). A  
1314 mass-tolerant database search identifies a large proportion of unassigned spectra in shotgun  
1315 proteomics as modified peptides. *Nat Biotechnol* **33**, 743-749.
- 1316 **Cho, H.K., Ahn, C.S., Lee, H.S., Kim, J.K., and Pai, H.S.** (2013). Pescadillo plays an essential role in plant  
1317 cell growth and survival by modulating ribosome biogenesis. *Plant J* **76**, 393-405.
- 1318 **Choi du, S., Lim, C.W., and Hwang, B.K.** (2016). Proteomics and functional analyses of Arabidopsis  
1319 nitrilases involved in the defense response to microbial pathogens. *Planta* **244**, 449-465.
- 1320 **Christ, B., Sussenbacher, I., Moser, S., Bichsel, N., Egert, A., Muller, T., Krautler, B., and Hortensteiner,**  
1321 **S.** (2013). Cytochrome P450 CYP89A9 is involved in the formation of major chlorophyll  
1322 catabolites during leaf senescence in Arabidopsis. *Plant Cell* **25**, 1868-1880.
- 1323 **Clay, N.K., Adio, A.M., Denoux, C., Jander, G., and Ausubel, F.M.** (2009). Glucosinolate metabolites  
1324 required for an Arabidopsis innate immune response. *Science* **323**, 95-101.
- 1325 **Dekker, C., Roe, S.M., McCormack, E.A., Beuron, F., Pearl, L.H., and Willison, K.R.** (2011). The crystal  
1326 structure of yeast CCT reveals intrinsic asymmetry of eukaryotic cytosolic chaperonins. *EMBO J*  
1327 **30**, 3078-3090.
- 1328 **Denoux, C., Galletti, R., Mammarella, N., Gopalan, S., Werck, D., De Lorenzo, G., Ferrari, S., Ausubel,**  
1329 **F.M., and Dewdney, J.** (2008). Activation of defense response pathways by OGs and Flg22  
1330 elicitors in Arabidopsis seedlings. *Mol Plant* **1**, 423-445.
- 1331 **Duncan, O., Trosch, J., Fenske, R., Taylor, N.L., and Millar, A.H.** (2017). Resource: Mapping the Triticum  
1332 aestivum proteome. *Plant J* **89**, 601-616.
- 1333 **Finkelstein, R., Reeves, W., Ariizumi, T., and Steber, C.** (2008). Molecular aspects of seed dormancy.  
1334 *Annu Rev Plant Biol* **59**, 387-415.
- 1335 **Friml, J.** (2003). Auxin transport - shaping the plant. *Curr Opin Plant Biol* **6**, 7-12.
- 1336 **Fujita, M., Fujita, Y., Maruyama, K., Seki, M., Hiratsu, K., Ohme-Takagi, M., Tran, L.S., Yamaguchi-**  
1337 **Shinozaki, K., and Shinozaki, K.** (2004). A dehydration-induced NAC protein, RD26, is involved in  
1338 a novel ABA-dependent stress-signaling pathway. *Plant J* **39**, 863-876.
- 1339 **Futschik, M.E., and Carlisle, B.** (2005). Noise-robust soft clustering of gene expression time-course data.  
1340 *J Bioinform Comput Biol* **3**, 965-988.
- 1341 **Gavin, A.C., Aloy, P., Grandi, P., Krause, R., Boesche, M., Marzioch, M., Rau, C., Jensen, L.J., Bastuck, S.,**  
1342 **Dumpelfeld, B., Edlmann, A., Heurtier, M.A., Hoffman, V., Hoefert, C., Klein, K., Hudak, M.,**  
1343 **Michon, A.M., Schelder, M., Schirle, M., Remor, M., Rudi, T., Hooper, S., Bauer, A.,**  
1344 **Bouwmeester, T., Casari, G., Drewes, G., Neubauer, G., Rick, J.M., Kuster, B., Bork, P., Russell,**  
1345 **R.B., and Superti-Furga, G.** (2006). Proteome survey reveals modularity of the yeast cell  
1346 machinery. *Nature* **440**, 631-636.
- 1347 **Gavin, A.C., Bosche, M., Krause, R., Grandi, P., Marzioch, M., Bauer, A., Schultz, J., Rick, J.M., Michon,**  
1348 **A.M., Cruciat, C.M., Remor, M., Hofert, C., Schelder, M., Brajenovic, M., Ruffner, H., Merino,**  
1349 **A., Klein, K., Hudak, M., Dickson, D., Rudi, T., Gnau, V., Bauch, A., Bastuck, S., Huhse, B.,**  
1350 **Leutwein, C., Heurtier, M.A., Copley, R.R., Edlmann, A., Querfurth, E., Rybin, V., Drewes, G.,**  
1351 **Raida, M., Bouwmeester, T., Bork, P., Seraphin, B., Kuster, B., Neubauer, G., and Superti-**  
1352 **Furga, G.** (2002). Functional organization of the yeast proteome by systematic analysis of  
1353 protein complexes. *Nature* **415**, 141-147.



- 1354 **Goda, H., Sasaki, E., Akiyama, K., Maruyama-Nakashita, A., Nakabayashi, K., Li, W., Ogawa, M.,**  
1355 **Yamauchi, Y., Preston, J., Aoki, K., Kiba, T., Takatsuto, S., Fujioka, S., Asami, T., Nakano, T.,**  
1356 **Kato, H., Mizuno, T., Sakakibara, H., Yamaguchi, S., Nambara, E., Kamiya, Y., Takahashi, H.,**  
1357 **Hirai, M.Y., Sakurai, T., Shinozaki, K., Saito, K., Yoshida, S., and Shimada, Y. (2008). The**  
1358 **AtGenExpress hormone and chemical treatment data set: experimental design, data evaluation,**  
1359 **model data analysis and data access. Plant J 55, 526-542.**
- 1360 **Gohre, V., Jones, A.M., Sklenar, J., Robatzek, S., and Weber, A.P. (2012). Molecular crosstalk between**  
1361 **PAMP-triggered immunity and photosynthesis. Mol Plant Microbe Interact 25, 1083-1092.**
- 1362 **Grigorova, B., Mara, C., Hollender, C., Sijacic, P., Chen, X., and Liu, Z. (2011). LEUNIG and SEUSS co-**  
1363 **repressors regulate miR172 expression in Arabidopsis flowers. Development 138, 2451-2456.**
- 1364 **Guan, D., Yan, B., Thieme, C., Hua, J., Zhu, H., Boheler, K.R., Zhao, Z., Kragler, F., Xia, Y., and Zhang, S.**  
1365 **(2017). PlaMoM: a comprehensive database compiles plant mobile macromolecules. Nucleic**  
1366 **Acids Res 45, D1021-D1028.**
- 1367 **Han, X., Kumar, D., Chen, H., Wu, S., and Kim, J.Y. (2014). Transcription factor-mediated cell-to-cell**  
1368 **signalling in plants. J Exp Bot 65, 1737-1749.**
- 1369 **Hauri, S., Comoglio, F., Seimiya, M., Gerstung, M., Glatter, T., Hansen, K., Aebersold, R., Paro, R.,**  
1370 **Gstaiger, M., and Beisel, C. (2016). A High-Density Map for Navigating the Human Polycomb**  
1371 **Complexome. Cell Rep 17, 583-595.**
- 1372 **Henras, A.K., Plisson-Chastang, C., O'Donohue, M.F., Chakraborty, A., and Gleizes, P.E. (2015). An**  
1373 **overview of pre-ribosomal RNA processing in eukaryotes. Wiley Interdiscip Rev RNA 6, 225-242.**
- 1374 **Henras, A.K., Soudet, J., Gerus, M., Lebaron, S., Caizergues-Ferrer, M., Mougin, A., and Henry, Y.**  
1375 **(2008). The post-transcriptional steps of eukaryotic ribosome biogenesis. Cell Mol Life Sci 65,**  
1376 **2334-2359.**
- 1377 **Hillmer, R.A., Tsuda, K., Rallapalli, G., Asai, S., Truman, W., Papke, M.D., Sakakibara, H., Jones, J.D.G.,**  
1378 **Myers, C.L., and Katagiri, F. (2017). The highly buffered Arabidopsis immune signaling network**  
1379 **conceals the functions of its components. PLoS Genet 13, e1006639.**
- 1380 **Hoehenwarter, W., Monchgesang, S., Neumann, S., Majovsky, P., Abel, S., and Muller, J. (2016).**  
1381 **Comparative expression profiling reveals a role of the root apoplast in local phosphate response.**  
1382 **BMC Plant Biol 16, 106.**
- 1383 **Horstman, A., Fukuoka, H., Muino, J.M., Nitsch, L., Guo, C., Passarinho, P., Sanchez-Perez, G., Immink,**  
1384 **R., Angenent, G., and Boutilier, K. (2015). AIL and HDG proteins act antagonistically to control**  
1385 **cell proliferation. Development 142, 454-464.**
- 1386 **Huang, D., Wu, W., Abrams, S.R., and Cutler, A.J. (2008). The relationship of drought-related gene**  
1387 **expression in Arabidopsis thaliana to hormonal and environmental factors. J Exp Bot 59, 2991-**  
1388 **3007.**
- 1389 **Ishida, T., Maekawa, S., and Yanagisawa, S. (2016). The Pre-rRNA Processing Complex in Arabidopsis**  
1390 **Includes Two WD40-Domain-Containing Proteins Encoded by Glucose-Inducible Genes and**  
1391 **Plant-Specific Proteins. Mol Plant 9, 312-315.**
- 1392 **Jang, G., Lee, S., Chang, S.H., Kim, J.K., and Choi, Y.D. (2018). Jasmonic acid modulates xylem**  
1393 **development by controlling polar auxin transport in vascular tissues. Plant Biotechnol Rep 12,**  
1394 **265-271.**
- 1395 **Jia, H.F., Chai, Y.M., Li, C.L., Lu, D., Luo, J.J., Qin, L., and Shen, Y.Y. (2011). Abscisic acid plays an**  
1396 **important role in the regulation of strawberry fruit ripening. Plant Physiol 157, 188-199.**
- 1397 **Kanei, M., Horiguchi, G., and Tsukaya, H. (2012). Stable establishment of cotyledon identity during**  
1398 **embryogenesis in Arabidopsis by ANGUSTIFOLIA3 and HANABA TARANU. Development 139,**  
1399 **2436-2446.**

- 1400 **Kong, A.T., Leprevost, F.V., Avtonomov, D.M., Mellacheruvu, D., and Nesvizhskii, A.I.** (2017).  
1401 MSFragger: ultrafast and comprehensive peptide identification in mass spectrometry-based  
1402 proteomics. *Nat Methods* **14**, 513-520.
- 1403 **Krogan, N.J., Cagney, G., Yu, H., Zhong, G., Guo, X., Ignatchenko, A., Li, J., Pu, S., Datta, N., Tikuisis,**  
1404 **A.P., Punna, T., Peregrin-Alvarez, J.M., Shales, M., Zhang, X., Davey, M., Robinson, M.D.,**  
1405 **Paccanaro, A., Bray, J.E., Sheung, A., Beattie, B., Richards, D.P., Canadien, V., Lalev, A., Mena,**  
1406 **F., Wong, P., Starostine, A., Canete, M.M., Vlasblom, J., Wu, S., Orsi, C., Collins, S.R., Chandran,**  
1407 **S., Haw, R., Rilstone, J.J., Gandi, K., Thompson, N.J., Musso, G., St Onge, P., Ghanny, S., Lam,**  
1408 **M.H., Butland, G., Altaf-Ul, A.M., Kanaya, S., Shilatifard, A., O'Shea, E., Weissman, J.S., Ingles,**  
1409 **C.J., Hughes, T.R., Parkinson, J., Gerstein, M., Wodak, S.J., Emili, A., and Greenblatt, J.F.** (2006).  
1410 Global landscape of protein complexes in the yeast *Saccharomyces cerevisiae*. *Nature* **440**, 637-  
1411 643.
- 1412 **Kunkel, B.N., and Harper, C.P.** (2018). The roles of auxin during interactions between bacterial plant  
1413 pathogens and their hosts. *J Exp Bot* **69**, 245-254.
- 1414 **Kustatscher, G., Grabowski, P., Schrader, T.A., Passmore, J.B., Schrader, M., and Rappsilber, J.** (2019).  
1415 Co-regulation map of the human proteome enables identification of protein functions. *Nat*  
1416 *Biotechnol* **37**, 1361-1371.
- 1417 **Lan, P., Li, W., and Schmidt, W.** (2012). Complementary proteome and transcriptome profiling in  
1418 phosphate-deficient *Arabidopsis* roots reveals multiple levels of gene regulation. *Mol Cell*  
1419 *Proteomics* **11**, 1156-1166.
- 1420 **Lee, J.H., Yoon, H.J., Terzaghi, W., Martinez, C., Dai, M., Li, J., Byun, M.O., and Deng, X.W.** (2010).  
1421 DWA1 and DWA2, two *Arabidopsis* DWD protein components of CUL4-based E3 ligases, act  
1422 together as negative regulators in ABA signal transduction. *Plant Cell* **22**, 1716-1732.
- 1423 **Lee, J.H., Terzaghi, W., Gusmaroli, G., Charron, J.B., Yoon, H.J., Chen, H., He, Y.J., Xiong, Y., and Deng,**  
1424 **X.W.** (2008). Characterization of *Arabidopsis* and rice DWD proteins and their roles as substrate  
1425 receptors for CUL4-RING E3 ubiquitin ligases. *Plant Cell* **20**, 152-167.
- 1426 **Leon-Reyes, A., Van der Does, D., De Lange, E.S., Delker, C., Wasternack, C., Van Wees, S.C., Ritsema,**  
1427 **T., and Pieterse, C.M.** (2010). Salicylate-mediated suppression of jasmonate-responsive gene  
1428 expression in *Arabidopsis* is targeted downstream of the jasmonate biosynthesis pathway.  
1429 *Planta* **232**, 1423-1432.
- 1430 **Li, J., Brader, G., and Palva, E.T.** (2004). The WRKY70 transcription factor: a node of convergence for  
1431 jasmonate-mediated and salicylate-mediated signals in plant defense. *Plant Cell* **16**, 319-331.
- 1432 **Liu, X., Li, Y., and Zhong, S.** (2017). Interplay between Light and Plant Hormones in the Control of  
1433 *Arabidopsis* Seedling Chlorophyll Biosynthesis. *Front Plant Sci* **8**, 1433.
- 1434 **Lopez-Molina, L., Mongrand, S., Kinoshita, N., and Chua, N.H.** (2003). AFP is a novel negative regulator  
1435 of ABA signaling that promotes ABI5 protein degradation. *Genes Dev* **17**, 410-418.
- 1436 **Lynch, T.J., Erickson, B.J., Miller, D.R., and Finkelstein, R.R.** (2017). ABI5-binding proteins (AFPs) alter  
1437 transcription of ABA-induced genes via a variety of interactions with chromatin modifiers. *Plant*  
1438 *Mol Biol* **93**, 403-418.
- 1439 **Meng, X., Zhou, J., Tang, J., Li, B., de Oliveira, M.V.V., Chai, J., He, P., and Shan, L.** (2016). Ligand-  
1440 Induced Receptor-like Kinase Complex Regulates Floral Organ Abscission in *Arabidopsis*. *Cell Rep*  
1441 **14**, 1330-1338.
- 1442 **Merchant, C., Stepanova, A.N., and Alonso, J.M.** (2017). Translation regulation in plants: an interesting  
1443 past, an exciting present and a promising future. *Plant J* **90**, 628-653.
- 1444 **Meteignier, L.V., El Oirdi, M., Cohen, M., Barff, T., Matteau, D., Lucier, J.F., Rodrigue, S., Jacques, P.E.,**  
1445 **Yoshioka, K., and Moffett, P.** (2017). Translatome analysis of an NB-LRR immune response  
1446 identifies important contributors to plant immunity in *Arabidopsis*. *J Exp Bot* **68**, 2333-2344.

- 1447 **Mine, A., Nobori, T., Salazar-Rondon, M.C., Winkelmueller, T.M., Anver, S., Becker, D., and Tsuda, K.**  
1448 (2017). An incoherent feed-forward loop mediates robustness and tunability in a plant immune  
1449 network. *EMBO Rep* **18**, 464-476.
- 1450 **Missbach, S., Weis, B.L., Martin, R., Simm, S., Bohnsack, M.T., and Schleiff, E.** (2013). 40S ribosome  
1451 biogenesis co-factors are essential for gametophyte and embryo development. *PLoS One* **8**,  
1452 e54084.
- 1453 **Mordret, E., Dahan, O., Asraf, O., Rak, R., Yehonadav, A., Barnabas, G.D., Cox, J., Geiger, T., Lindner,  
1454 A.B., and Pilpel, Y.** (2019). Systematic Detection of Amino Acid Substitutions in Proteomes  
1455 Reveals Mechanistic Basis of Ribosome Errors and Selection for Translation Fidelity. *Mol Cell* **75**,  
1456 427-441 e425.
- 1457 **Muller, T.M., Bottcher, C., and Glawischmig, E.** (2019). Dissection of the network of indolic defence  
1458 compounds in *Arabidopsis thaliana* by multiple mutant analysis. *Phytochemistry* **161**, 11-20.
- 1459 **Nakashima, K., Takasaki, H., Mizoi, J., Shinozaki, K., and Yamaguchi-Shinozaki, K.** (2012). NAC  
1460 transcription factors in plant abiotic stress responses. *Biochim Biophys Acta* **1819**, 97-103.
- 1461 **Navarro, L., Dunoyer, P., Jay, F., Arnold, B., Dharmasiri, N., Estelle, M., Voinnet, O., and Jones, J.D.**  
1462 (2006). A plant miRNA contributes to antibacterial resistance by repressing auxin signaling.  
1463 *Science* **312**, 436-439.
- 1464 **Nee, G., Kramer, K., Nakabayashi, K., Yuan, B., Xiang, Y., Miatton, E., Finkemeier, I., and Soppe, W.J.J.**  
1465 (2017). DELAY OF GERMINATION1 requires PP2C phosphatases of the ABA signalling pathway to  
1466 control seed dormancy. *Nat Commun* **8**, 72.
- 1467 **Nickstadt, A., Thomma, B.P.H.J., Feussner, I., Kangasjarvi, J., Zeier, J., Loeffler, C., Scheel, D., and  
1468 Berger, S.** (2004). The jasmonate-insensitive mutant *jin1* shows increased resistance to  
1469 biotrophic as well as necrotrophic pathogens. *Mol Plant Pathol* **5**, 425-434.
- 1470 **Obayashi, T., Hayashi, S., Saeki, M., Ohta, H., and Kinoshita, K.** (2009). ATTED-II provides coexpressed  
1471 gene networks for *Arabidopsis*. *Nucleic Acids Res* **37**, D987-991.
- 1472 **Paez Valencia, J., Goodman, K., and Otegui, M.S.** (2016). Endocytosis and Endosomal Trafficking in  
1473 Plants. *Annu Rev Plant Biol* **67**, 309-335.
- 1474 **Patharkar, O.R., and Walker, J.C.** (2016). Core Mechanisms Regulating Developmentally Timed and  
1475 Environmentally Triggered Abscission. *Plant Physiol* **172**, 510-520.
- 1476 **Patharkar, O.R., and Walker, J.C.** (2018). Advances in abscission signaling. *J Exp Bot* **69**, 733-740.
- 1477 **Patterson, S.E., and Bleeker, A.B.** (2004). Ethylene-dependent and -independent processes associated  
1478 with floral organ abscission in *Arabidopsis*. *Plant Physiol* **134**, 194-203.
- 1479 **Pieterse, C.M., Van der Does, D., Zamioudis, C., Leon-Reyes, A., and Van Wees, S.C.** (2012). Hormonal  
1480 modulation of plant immunity. *Annu Rev Cell Dev Biol* **28**, 489-521.
- 1481 **Ponnala, L., Wang, Y., Sun, Q., and van Wijk, K.J.** (2014). Correlation of mRNA and protein abundance in  
1482 the developing maize leaf. *Plant J* **78**, 424-440.
- 1483 **Qi, L., Yan, J., Li, Y., Jiang, H., Sun, J., Chen, Q., Li, H., Chu, J., Yan, C., Sun, X., Yu, Y., Li, C., and Li, C.**  
1484 (2012). *Arabidopsis thaliana* plants differentially modulate auxin biosynthesis and transport  
1485 during defense responses to the necrotrophic pathogen *Alternaria brassicicola*. *New Phytol* **195**,  
1486 872-882.
- 1487 **Robatzek, S., Chinchilla, D., and Boller, T.** (2006). Ligand-induced endocytosis of the pattern recognition  
1488 receptor FLS2 in *Arabidopsis*. *Genes Dev* **20**, 537-542.
- 1489 **Rogers, H., and Munne-Bosch, S.** (2016). Production and Scavenging of Reactive Oxygen Species and  
1490 Redox Signaling during Leaf and Flower Senescence: Similar But Different. *Plant Physiol* **171**,  
1491 1560-1568.
- 1492 **Rounds, C.M., and Bezanilla, M.** (2013). Growth mechanisms in tip-growing plant cells. *Annu Rev Plant  
1493 Biol* **64**, 243-265.

- 1494 **Schmid, M., Davison, T.S., Henz, S.R., Pape, U.J., Demar, M., Vingron, M., Scholkopf, B., Weigel, D.,**  
1495 **and Lohmann, J.U.** (2005). A gene expression map of Arabidopsis thaliana development. *Nat*  
1496 *Genet* **37**, 501-506.
- 1497 **Sherp, A.M., Westfall, C.S., Alvarez, S., and Jez, J.M.** (2018). Arabidopsis thaliana GH3.15 acyl acid  
1498 amido synthetase has a highly specific substrate preference for the auxin precursor indole-3-  
1499 butyric acid. *J Biol Chem* **293**, 4277-4288.
- 1500 **Shim, J.S., Jung, C., Lee, S., Min, K., Lee, Y.W., Choi, Y., Lee, J.S., Song, J.T., Kim, J.K., and Choi, Y.D.**  
1501 (2013). AtMYB44 regulates WRKY70 expression and modulates antagonistic interaction between  
1502 salicylic acid and jasmonic acid signaling. *Plant J* **73**, 483-495.
- 1503 **Skinner, O.S., and Kelleher, N.L.** (2015). Illuminating the dark matter of shotgun proteomics. *Nat*  
1504 *Biotechnol* **33**, 717-718.
- 1505 **Smyth, D.R., Bowman, J.L., and Meyerowitz, E.M.** (1990). Early flower development in Arabidopsis.  
1506 *Plant Cell* **2**, 755-767.
- 1507 **Soltanieh, S., Lapensee, M., and Dragon, F.** (2014). Nucleolar proteins Bfr2 and Enp2 interact with  
1508 DEAD-box RNA helicase Dbp4 in two different complexes. *Nucleic Acids Res* **42**, 3194-3206.
- 1509 **Song, G., Hsu, P.Y., and Walley, J.W.** (2018). Assessment and Refinement of Sample Preparation  
1510 Methods for Deep and Quantitative Plant Proteome Profiling. *Proteomics* **18**, e1800220.
- 1511 **Song, S.K., Hofhuis, H., Lee, M.M., and Clark, S.E.** (2008). Key divisions in the early Arabidopsis embryo  
1512 require POL and PLL1 phosphatases to establish the root stem cell organizer and vascular axis.  
1513 *Dev Cell* **15**, 98-109.
- 1514 **Song, Y., Xiang, F., Zhang, G., Miao, Y., Miao, C., and Song, C.P.** (2016). Abscisic Acid as an Internal  
1515 Integrator of Multiple Physiological Processes Modulates Leaf Senescence Onset in Arabidopsis  
1516 thaliana. *Front Plant Sci* **7**, 181.
- 1517 **Spoel, S.H., Johnson, J.S., and Dong, X.** (2007). Regulation of tradeoffs between plant defenses against  
1518 pathogens with different lifestyles. *Proc Natl Acad Sci U S A* **104**, 18842-18847.
- 1519 **Spoel, S.H., Koornneef, A., Claessens, S.M., Korzelius, J.P., Van Pelt, J.A., Mueller, M.J., Buchala, A.J.,**  
1520 **Metraux, J.P., Brown, R., Kazan, K., Van Loon, L.C., Dong, X., and Pieterse, C.M.** (2003). NPR1  
1521 modulates cross-talk between salicylate- and jasmonate-dependent defense pathways through  
1522 a novel function in the cytosol. *Plant Cell* **15**, 760-770.
- 1523 **Stenvik, G.E., Butenko, M.A., Urbanowicz, B.R., Rose, J.K., and Aalen, R.B.** (2006). Overexpression of  
1524 INFLORESCENCE DEFICIENT IN ABSCISSION activates cell separation in vestigial abscission zones  
1525 in Arabidopsis. *Plant Cell* **18**, 1467-1476.
- 1526 **Su, J., Yang, L., Zhu, Q., Wu, H., He, Y., Liu, Y., Xu, J., Jiang, D., and Zhang, S.** (2018). Active  
1527 photosynthetic inhibition mediated by MPK3/MPK6 is critical to effector-triggered immunity.  
1528 *PLoS Biol* **16**, e2004122.
- 1529 **Sugawara, S., Hishiyama, S., Jikumaru, Y., Hanada, A., Nishimura, T., Koshiba, T., Zhao, Y., Kamiya, Y.,**  
1530 **and Kasahara, H.** (2009). Biochemical analyses of indole-3-acetaldoxime-dependent auxin  
1531 biosynthesis in Arabidopsis. *Proc Natl Acad Sci U S A* **106**, 5430-5435.
- 1532 **Szymanski, J., Levin, Y., Savidor, A., Breitel, D., Chappell-Maor, L., Heinig, U., Topfer, N., and Aharoni,**  
1533 **A.** (2017). Label-free deep shotgun proteomics reveals protein dynamics during tomato fruit  
1534 tissues development. *Plant J* **90**, 396-417.
- 1535 **Tabassum, N., Eschen-Lippold, L., Athmer, B., Baruah, M., Brode, M., Maldonado-Bonilla, L.D.,**  
1536 **Hoehenwarter, W., Hause, G., Scheel, D., and Lee, J.** (2019). Phosphorylation-dependent  
1537 control of an RNA granule-localized protein that fine-tunes defence gene expression at a post-  
1538 transcriptional level. *Plant J*.
- 1539 **Takasaki, H., Maruyama, K., Takahashi, F., Fujita, M., Yoshida, T., Nakashima, K., Myouga, F., Toyooka,**  
1540 **K., Yamaguchi-Shinozaki, K., and Shinozaki, K.** (2015). SNAC-As, stress-responsive NAC  
1541 transcription factors, mediate ABA-inducible leaf senescence. *Plant J* **84**, 1114-1123.



- 1542 **Teale, W.D., Paponov, I.A., and Palme, K.** (2006). Auxin in action: signalling, transport and the control of  
1543 plant growth and development. *Nat Rev Mol Cell Biol* **7**, 847-859.
- 1544 **Thieme, C.J., Rojas-Triana, M., Stecyk, E., Schudoma, C., Zhang, W., Yang, L., Minambres, M., Walther,**  
1545 **D., Schulze, W.X., Paz-Ares, J., Scheible, W.R., and Kragler, F.** (2015). Endogenous Arabidopsis  
1546 messenger RNAs transported to distant tissues. *Nat Plants* **1**, 15025.
- 1547 **Tran, L.S., Nakashima, K., Sakuma, Y., Simpson, S.D., Fujita, Y., Maruyama, K., Fujita, M., Seki, M.,**  
1548 **Shinozaki, K., and Yamaguchi-Shinozaki, K.** (2004). Isolation and functional analysis of  
1549 Arabidopsis stress-inducible NAC transcription factors that bind to a drought-responsive cis-  
1550 element in the early responsive to dehydration stress 1 promoter. *Plant Cell* **16**, 2481-2498.
- 1551 **Truman, W.M., Bennett, M.H., Turnbull, C.G.N., and Grant, M.R.** (2010a). Arabidopsis Auxin Mutants  
1552 Are Compromised in Systemic Acquired Resistance and Exhibit Aberrant Accumulation of  
1553 Various Indolic Compounds. *Plant Physiology* **152**, 1562-1573.
- 1554 **Truman, W.M., Bennett, M.H., Turnbull, C.G., and Grant, M.R.** (2010b). Arabidopsis auxin mutants are  
1555 compromised in systemic acquired resistance and exhibit aberrant accumulation of various  
1556 indolic compounds. *Plant Physiol* **152**, 1562-1573.
- 1557 **Tsuda, K., Sato, M., Glazebrook, J., Cohen, J.D., and Katagiri, F.** (2008). Interplay between MAMP-  
1558 triggered and SA-mediated defense responses. *Plant J* **53**, 763-775.
- 1559 **Van der Does, D., Leon-Reyes, A., Koornneef, A., Van Verk, M.C., Rodenburg, N., Pauwels, L.,**  
1560 **Goossens, A., Korbes, A.P., Memelink, J., Ritsema, T., Van Wees, S.C., and Pieterse, C.M.**  
1561 (2013). Salicylic acid suppresses jasmonic acid signaling downstream of SCFCO11-JAZ by targeting  
1562 GCC promoter motifs via transcription factor ORA59. *Plant Cell* **25**, 744-761.
- 1563 **Walley, J.W., Sartor, R.C., Shen, Z., Schmitz, R.J., Wu, K.J., Urich, M.A., Nery, J.R., Smith, L.G., Schnable,**  
1564 **J.C., Ecker, J.R., and Briggs, S.P.** (2016). Integration of omic networks in a developmental atlas of  
1565 maize. *Science* **353**, 814-818.
- 1566 **Wan, C., Borgeson, B., Phanse, S., Tu, F., Drew, K., Clark, G., Xiong, X., Kagan, O., Kwan, J., Bezginov,**  
1567 **A., Chessman, K., Pal, S., Cromar, G., Papoulas, O., Ni, Z., Boutz, D.R., Stoilova, S., Havugimana,**  
1568 **P.C., Guo, X., Maly, R.H., Sarov, M., Greenblatt, J., Babu, M., Derry, W.B., Tillier, E.R.,**  
1569 **Wallingford, J.B., Parkinson, J., Marcotte, E.M., and Emili, A.** (2015). Panorama of ancient  
1570 metazoan macromolecular complexes. *Nature* **525**, 339-344.
- 1571 **Wang, X., Gao, J., Zhu, Z., Dong, X., Wang, X., Ren, G., Zhou, X., and Kuai, B.** (2015). TCP transcription  
1572 factors are critical for the coordinated regulation of isochorismate synthase 1 expression in  
1573 Arabidopsis thaliana. *Plant J* **82**, 151-162.
- 1574 **Wang, Y., Li, L., Ye, T., Lu, Y., Chen, X., and Wu, Y.** (2013). The inhibitory effect of ABA on floral  
1575 transition is mediated by ABI5 in Arabidopsis. *J Exp Bot* **64**, 675-684.
- 1576 **Waters, M.T., and Langdale, J.A.** (2009). The making of a chloroplast. *EMBO J* **28**, 2861-2873.
- 1577 **Weis, B.L., Kovacevic, J., Missbach, S., and Schleiff, E.** (2015). Plant-Specific Features of Ribosome  
1578 Biogenesis. *Trends Plant Sci* **20**, 729-740.
- 1579 **Wisniewski, J.R., Hein, M.Y., Cox, J., and Mann, M.** (2014). A "proteomic ruler" for protein copy number  
1580 and concentration estimation without spike-in standards. *Mol Cell Proteomics* **13**, 3497-3506.
- 1581 **Wojciechowska, N., Marzec-Schmidt, K., Kalemba, E.M., Zarzynska-Nowak, A., Jagodzinski, A.M., and**  
1582 **Bagniewska-Zadworna, A.** (2018). Autophagy counteracts instantaneous cell death during  
1583 seasonal senescence of the fine roots and leaves in *Populus trichocarpa*. *BMC Plant Biol* **18**, 260.
- 1584 **Wrzaczek, M., Brosche, M., Salojarvi, J., Kangasjarvi, S., Idanheimo, N., Mersmann, S., Robatzek, S.,**  
1585 **Karpinski, S., Karpinska, B., and Kangasjarvi, J.** (2010). Transcriptional regulation of the  
1586 CRK/DUF26 group of receptor-like protein kinases by ozone and plant hormones in Arabidopsis.  
1587 *BMC Plant Biol* **10**, 95.
- 1588 **Xu, G., Greene, G.H., Yoo, H., Liu, L., Marques, J., Motley, J., and Dong, X.** (2017). Global translational  
1589 reprogramming is a fundamental layer of immune regulation in plants. *Nature* **545**, 487-490.

- 1590 **Yadeta, K.A., Elmore, J.M., Creer, A.Y., Feng, B., Franco, J.Y., Rufian, J.S., He, P., Phinney, B., and**  
1591 **Coaker, G.** (2017). A Cysteine-Rich Protein Kinase Associates with a Membrane Immune  
1592 Complex and the Cysteine Residues Are Required for Cell Death. *Plant Physiol* **173**, 771-787.
- 1593 **Ye, H., Liu, S., Tang, B., Chen, J., Xie, Z., Nolan, T.M., Jiang, H., Guo, H., Lin, H.Y., Li, L., Wang, Y., Tong,**  
1594 **H., Zhang, M., Chu, C., Li, Z., Aluru, M., Aluru, S., Schnable, P.S., and Yin, Y.** (2017). RD26  
1595 mediates crosstalk between drought and brassinosteroid signalling pathways. *Nat Commun* **8**,  
1596 14573.
- 1597 **Yi, S.Y., Shirasu, K., Moon, J.S., Lee, S.G., and Kwon, S.Y.** (2014). The activated SA and JA signaling  
1598 pathways have an influence on flg22-triggered oxidative burst and callose deposition. *PLoS One*  
1599 **9**, e88951.
- 1600 **Zander, M., Thurow, C., and Gatz, C.** (2014). TGA Transcription Factors Activate the Salicylic Acid-  
1601 Suppressible Branch of the Ethylene-Induced Defense Program by Regulating ORA59 Expression.  
1602 *Plant Physiol* **165**, 1671-1683.
- 1603 **Zhang, M., Yuan, B., and Leng, P.** (2009). The role of ABA in triggering ethylene biosynthesis and  
1604 ripening of tomato fruit. *J Exp Bot* **60**, 1579-1588.
- 1605 **Zheng, X.Y., Zhou, M., Yoo, H., Pruneda-Paz, J.L., Spivey, N.W., Kay, S.A., and Dong, X.** (2015). Spatial  
1606 and temporal regulation of biosynthesis of the plant immune signal salicylic acid. *Proc Natl Acad*  
1607 *Sci U S A* **112**, 9166-9173.
- 1608 **Zheng, X.Y., Spivey, N.W., Zeng, W., Liu, P.P., Fu, Z.Q., Klessig, D.F., He, S.Y., and Dong, X.** (2012).  
1609 Coronatine promotes *Pseudomonas syringae* virulence in plants by activating a signaling cascade  
1610 that inhibits salicylic acid accumulation. *Cell Host Microbe* **11**, 587-596.
- 1611 **Ziegler, J., Qwegwer, J., Schubert, M., Erickson, J.L., Schattat, M., Burstenbinder, K., Grubb, C.D., and**  
1612 **Abel, S.** (2014). Simultaneous analysis of apolar phytohormones and 1-aminocyclopropan-1-  
1613 carboxylic acid by high performance liquid chromatography/electrospray negative ion tandem  
1614 mass spectrometry via 9-fluorenylmethoxycarbonyl chloride derivatization. *J Chromatogr A*  
1615 **1362**, 102-109.

1616

1617

1618

1619

1620

1621

1622

1623

1624

1625



1626 Supplemental figure 1

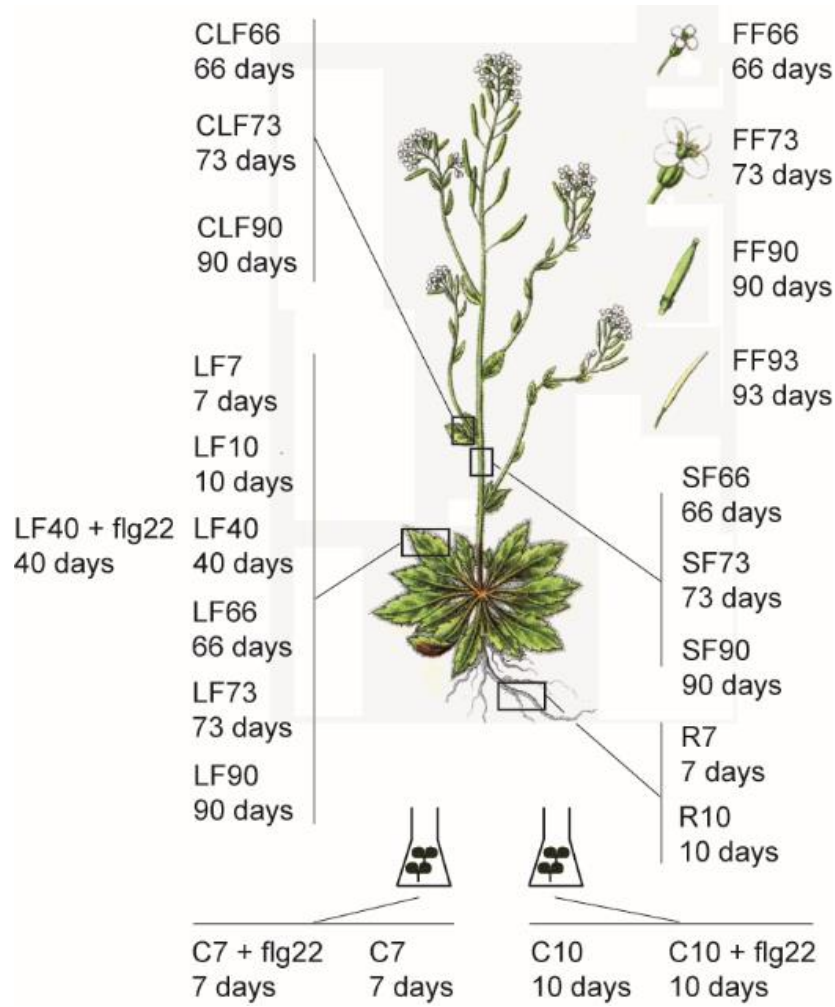

1627

1628

1629

1630

1631

1632

1633

1634

1635

1636 Supplemental figure 2

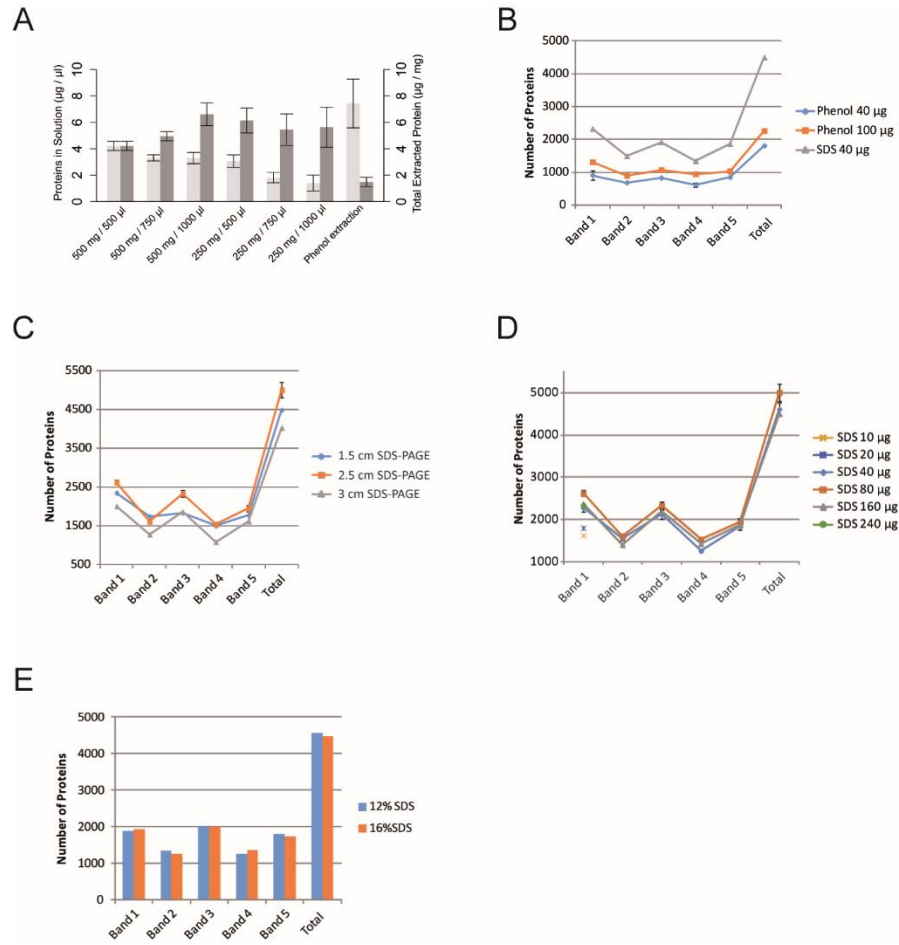

1637

1638

1639

1640

1641

1642

1643

1644

1645

1646

1647 Supplemental figure 3

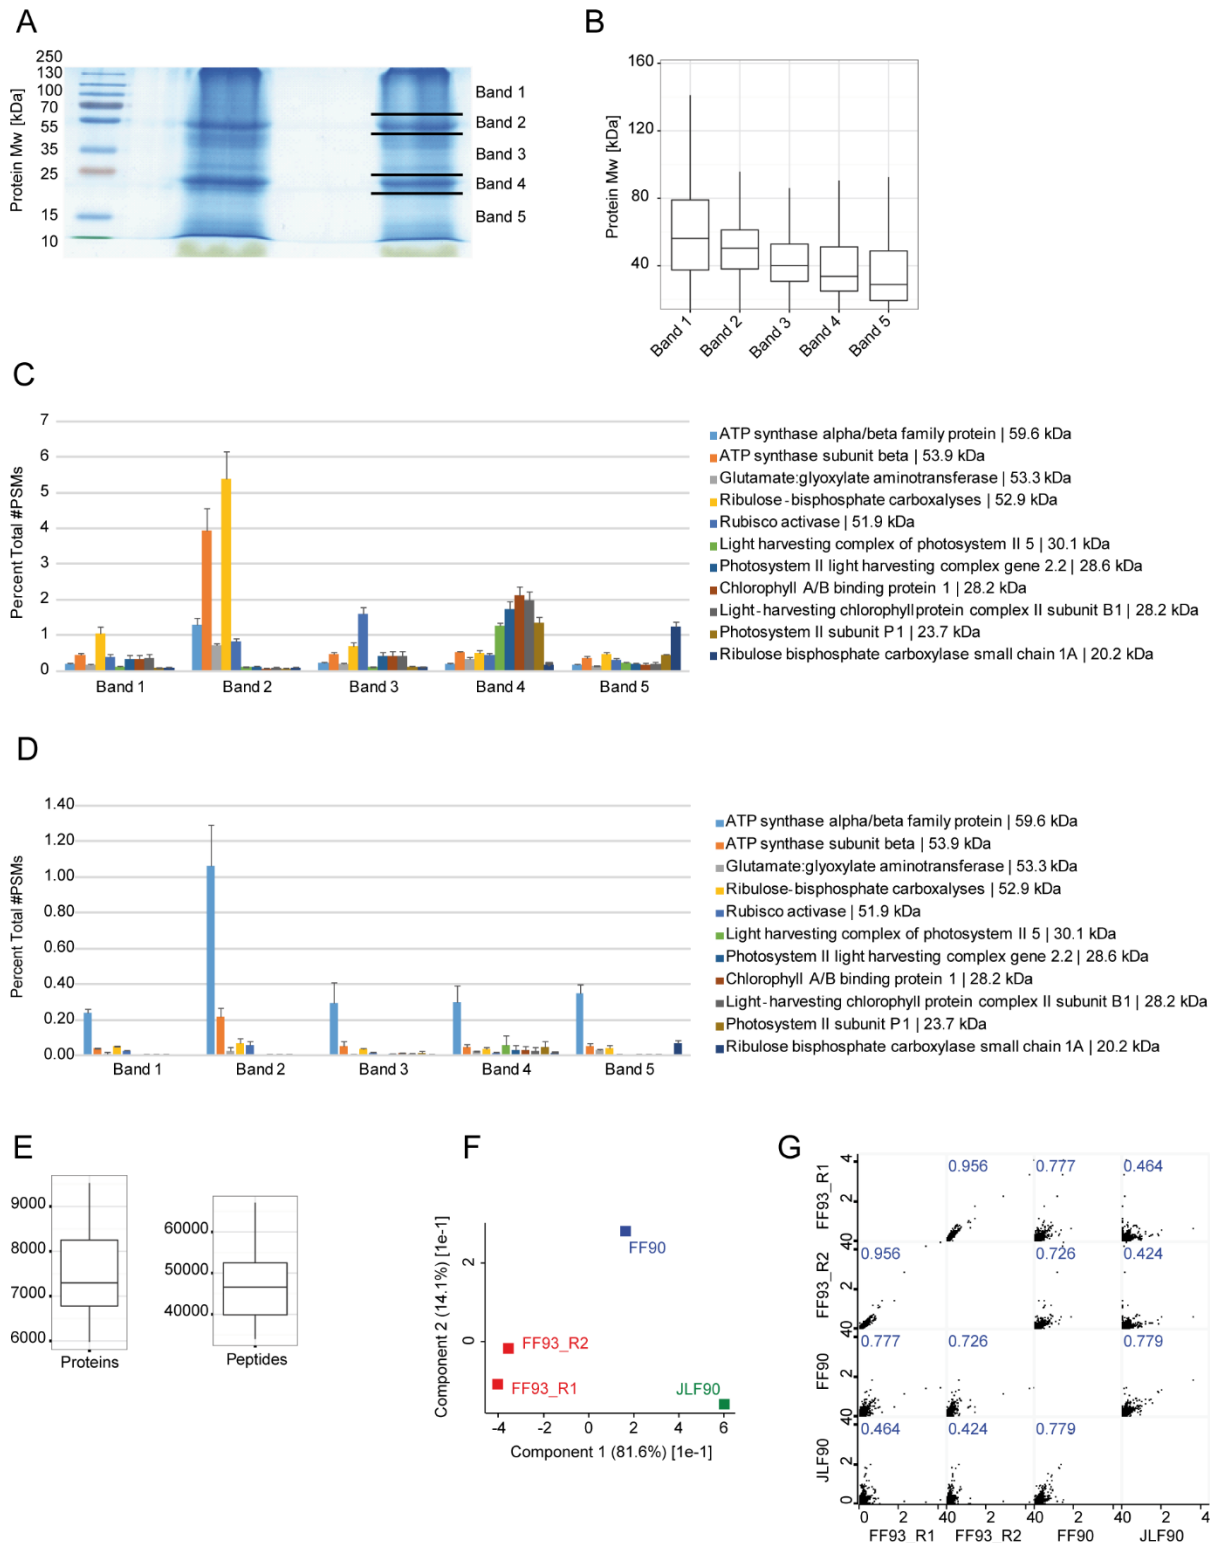

1648

1649

1650 Supplemental figure 4

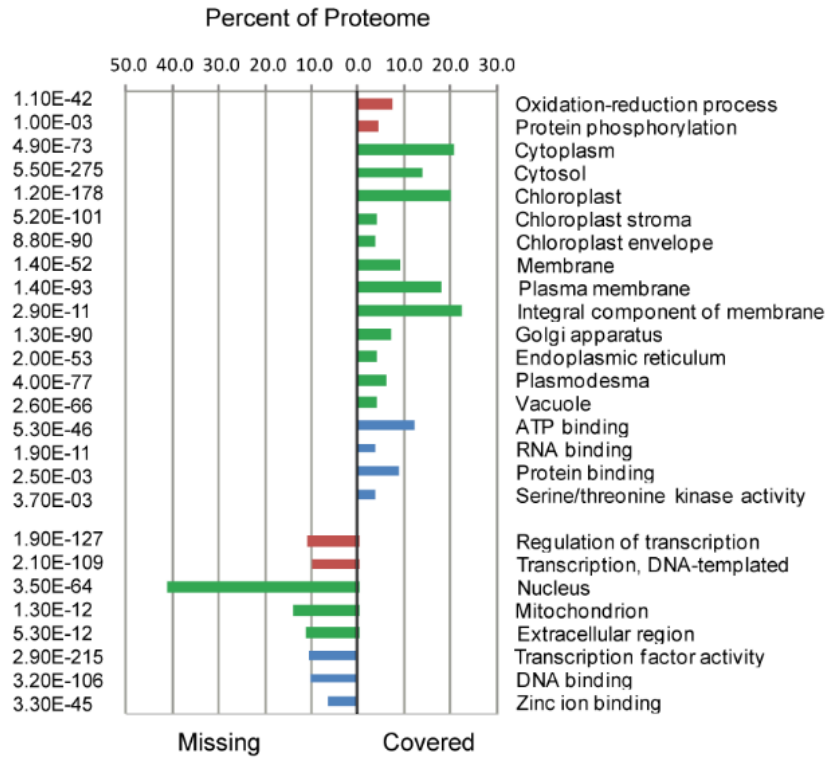

1651 ■ Biological Process (BP) ■ Cellular Compartment (CC) ■ Molecular Function (MF)

1652

1653

1654

1655

1656

1657

1658

1659

1660

1661

1662 Supplemental figure 5

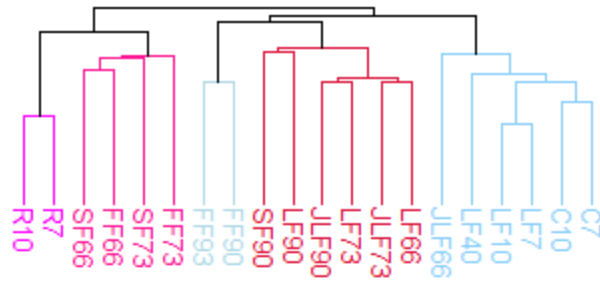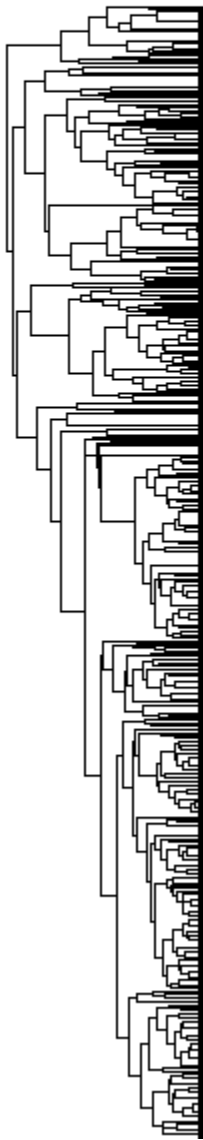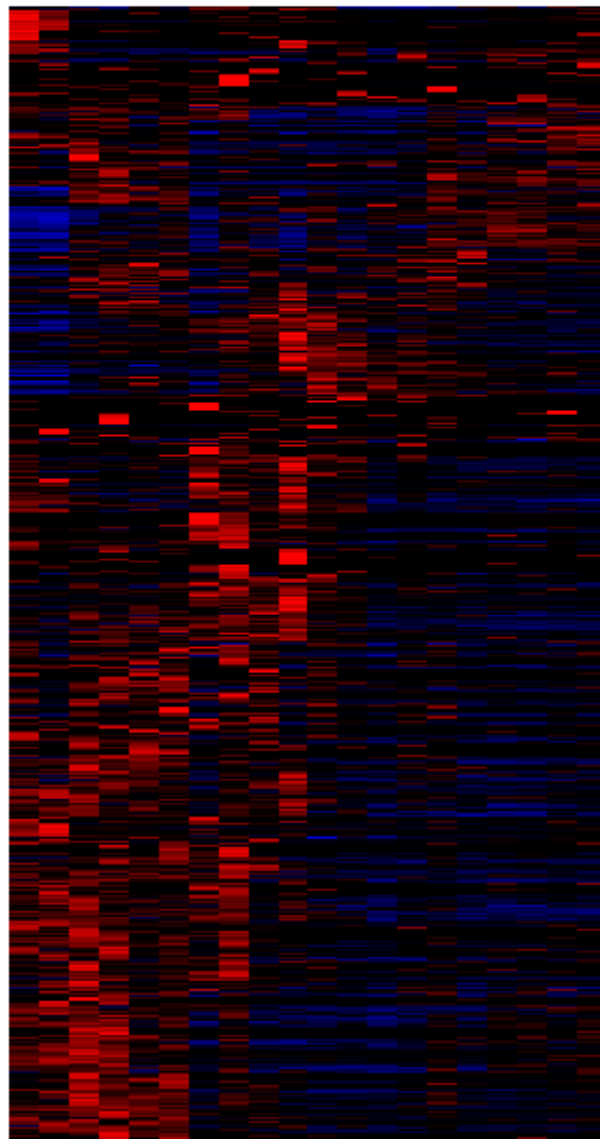

1663

1664

1665 Supplemental figure 6

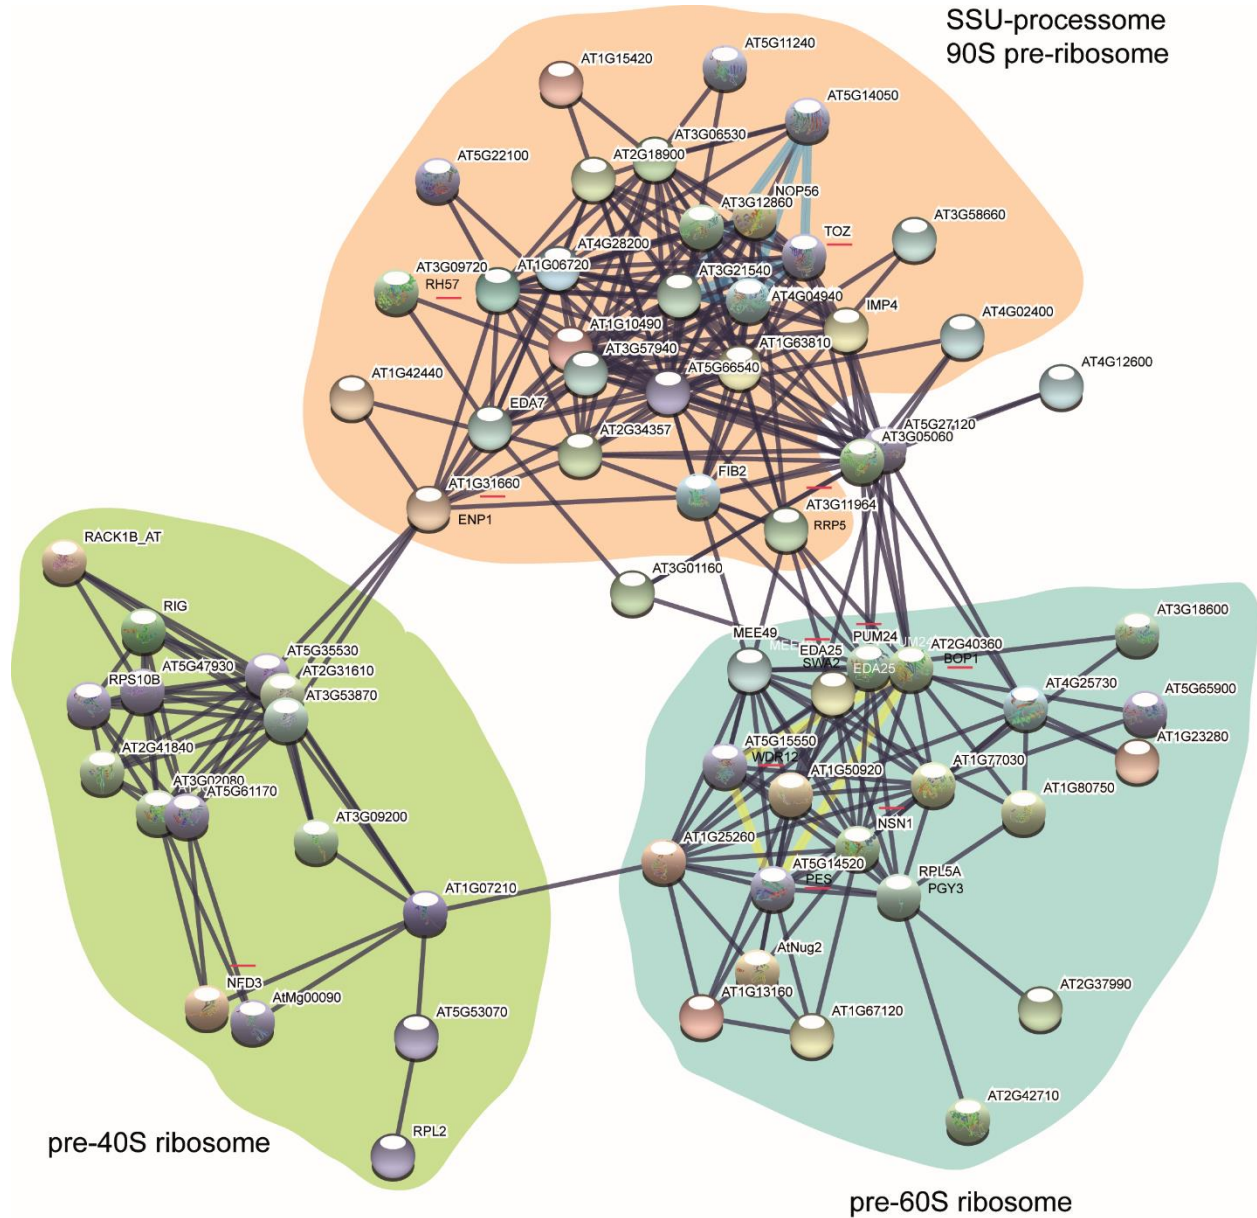

1666

1667

1668

1669

1670

1671



1672 Supplemental figure 7

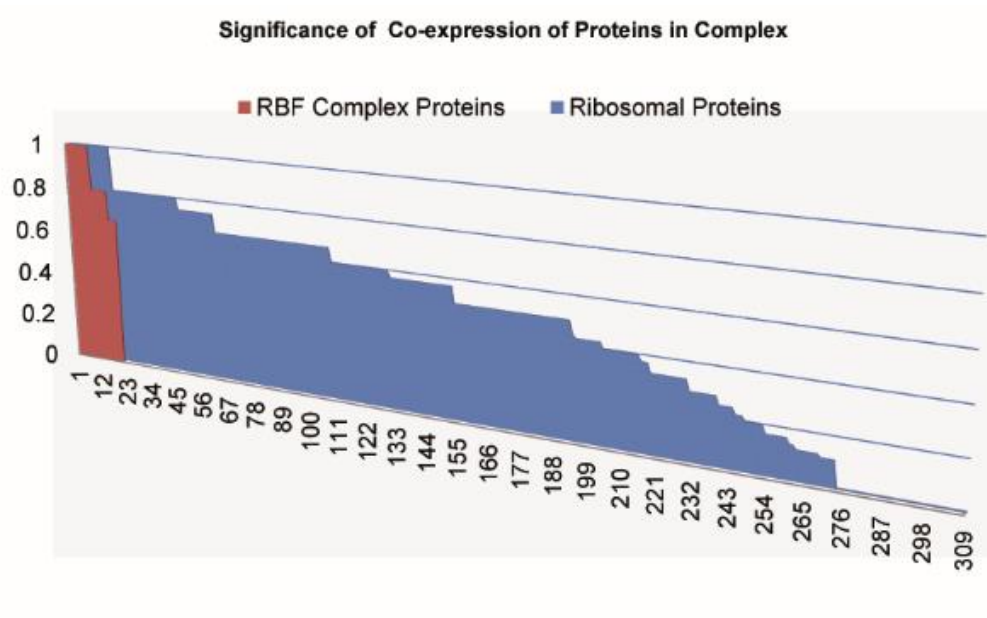

1673

1674

1675

1676

1677

1678

1679

1680

1681

1682

1683

1684

1685

1686

1687 Supplemental figure 8

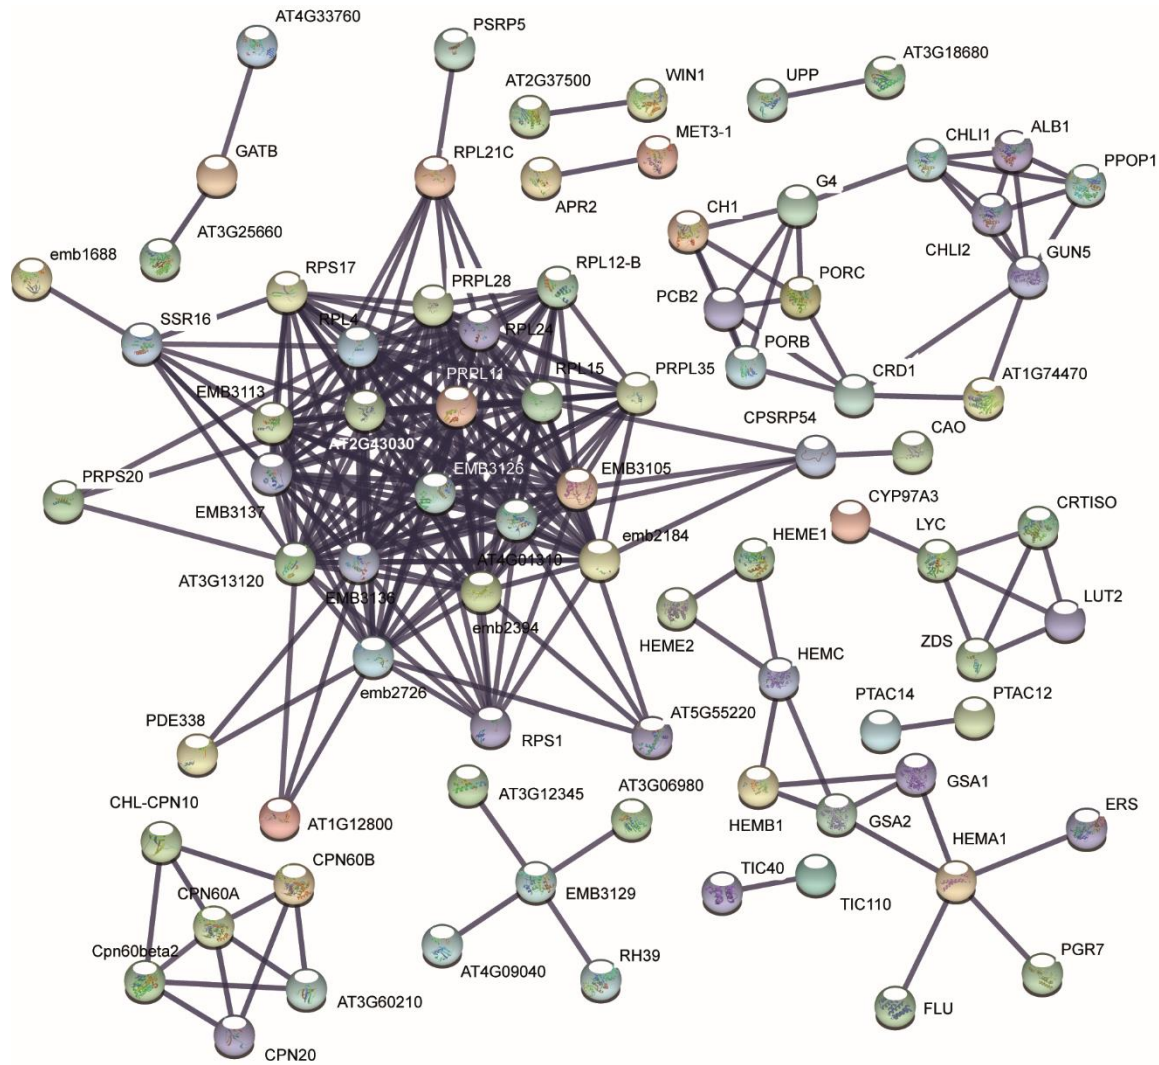

1688

1689

1690

1691

1692

1693

1694

1695

1696 Supplemental figure 9

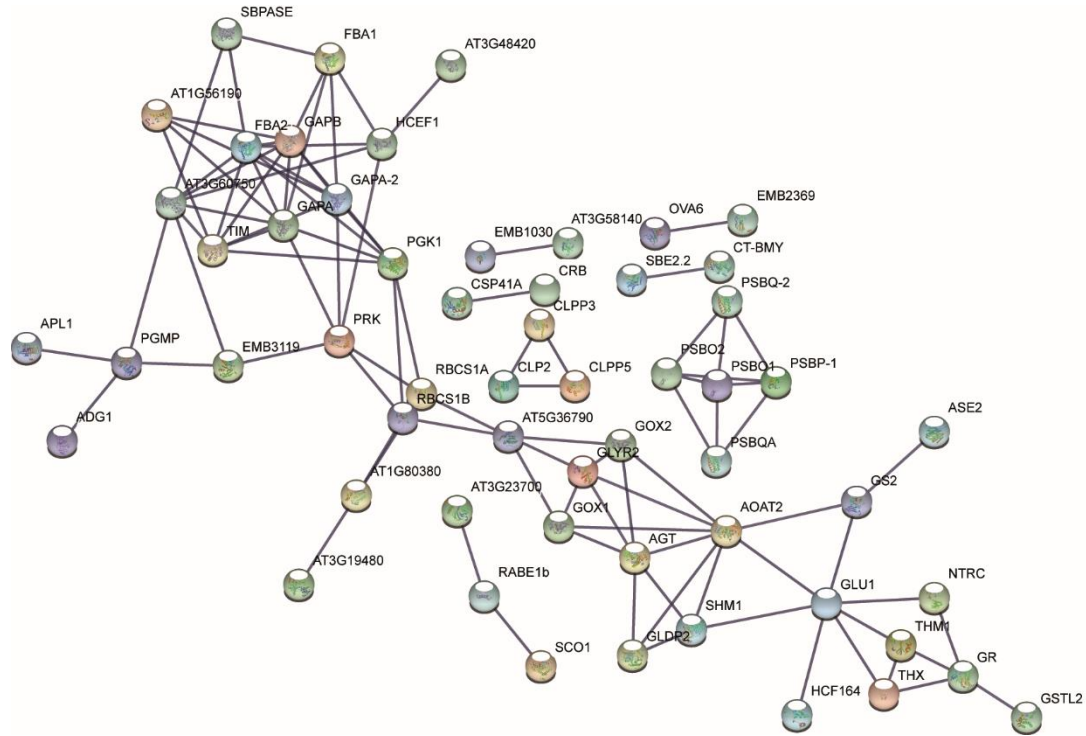

1697

1698

1699

1700

1701

1702

1703

1704

1705

1706

1707

1708

1709

1710 Supplemental figure 10

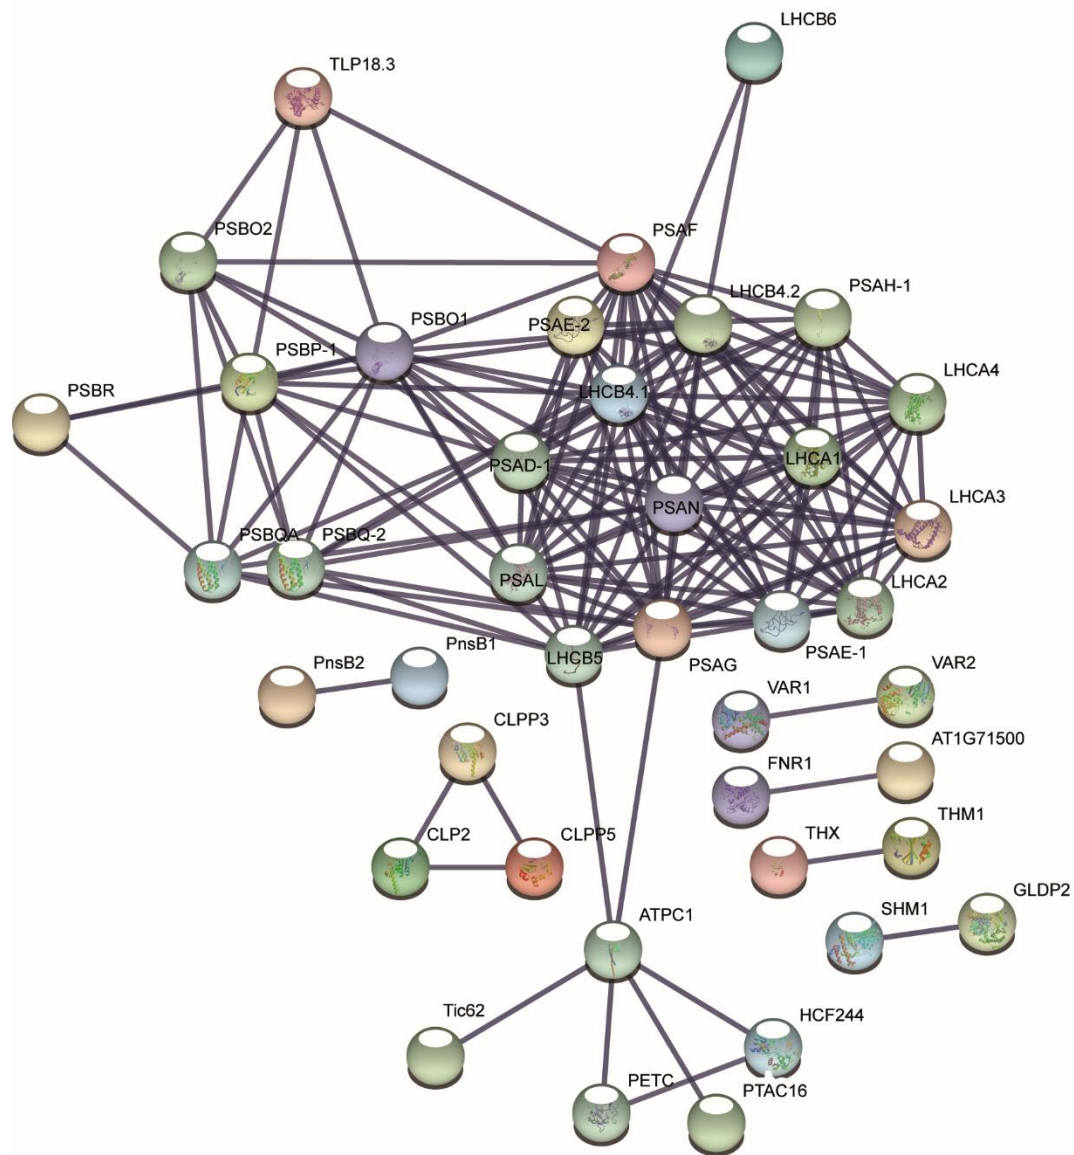

1711

1712

1713

1714

1715

1716

1717

1718 Supplemental figure 11

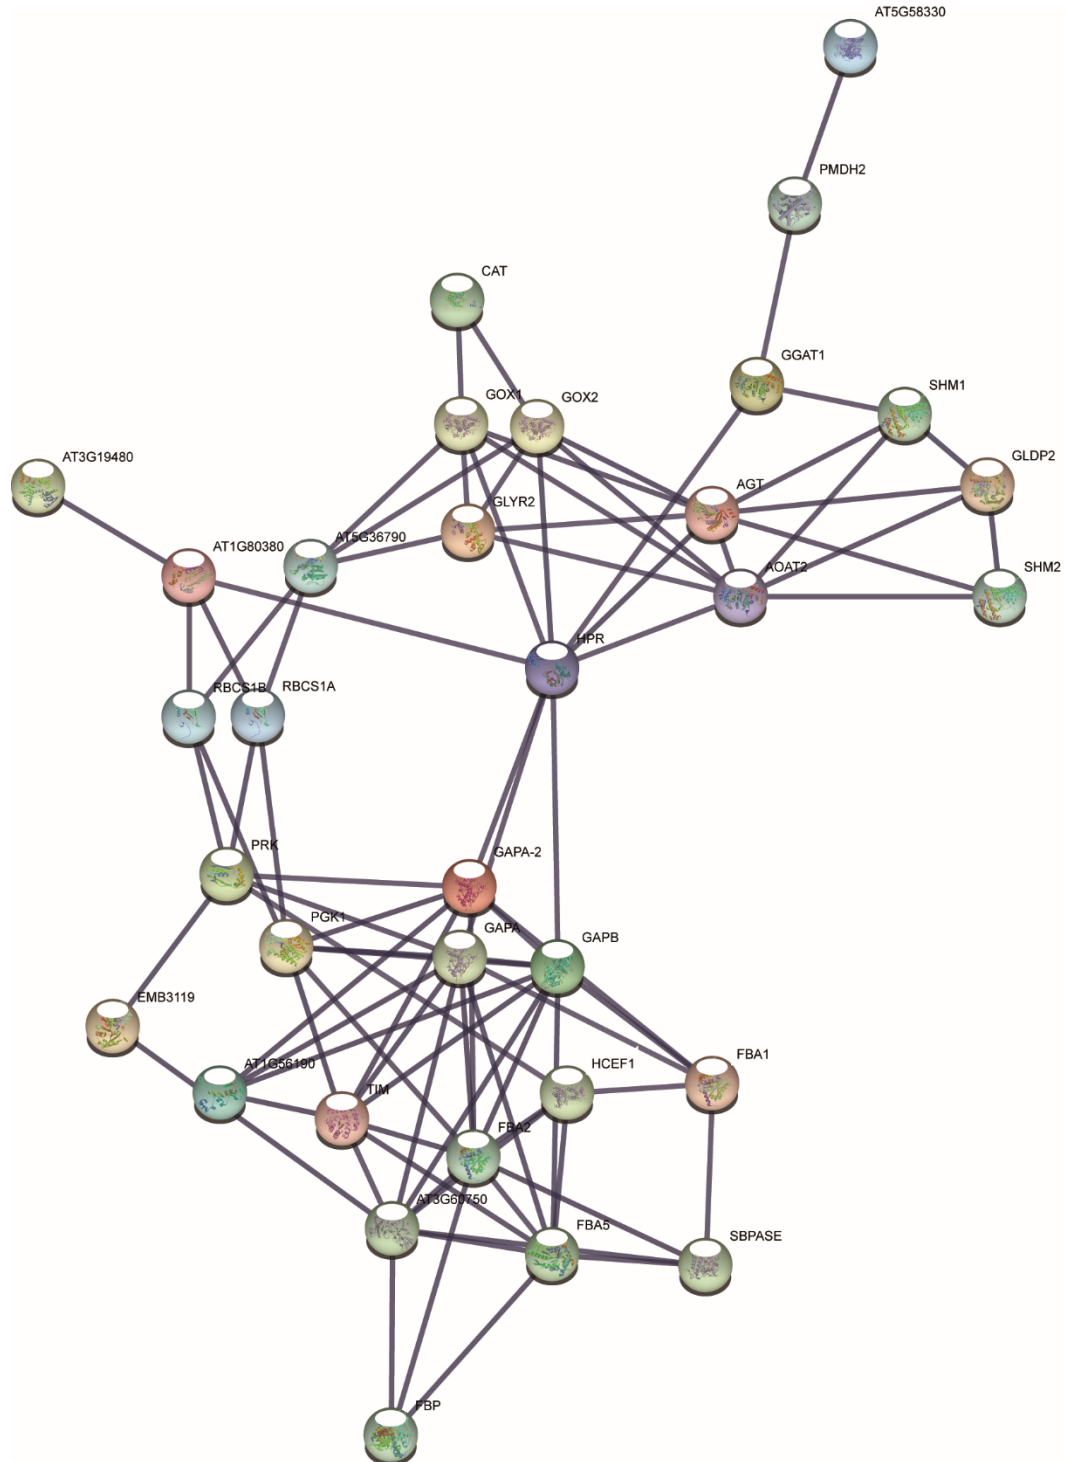

1719

1720

1721

1722 Supplemental figure 12

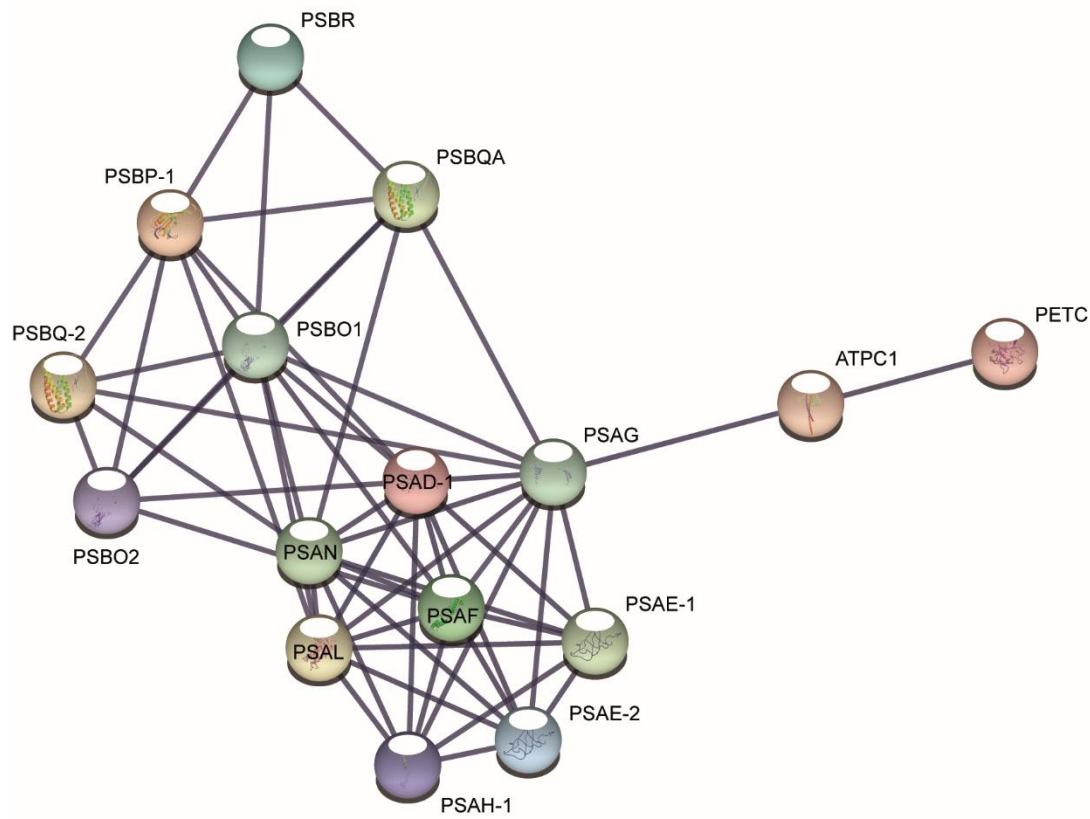

1723

1724

1725

1726

1727

1728

1729

1730

1731

1732

1733



1734 Supplemental figure 13

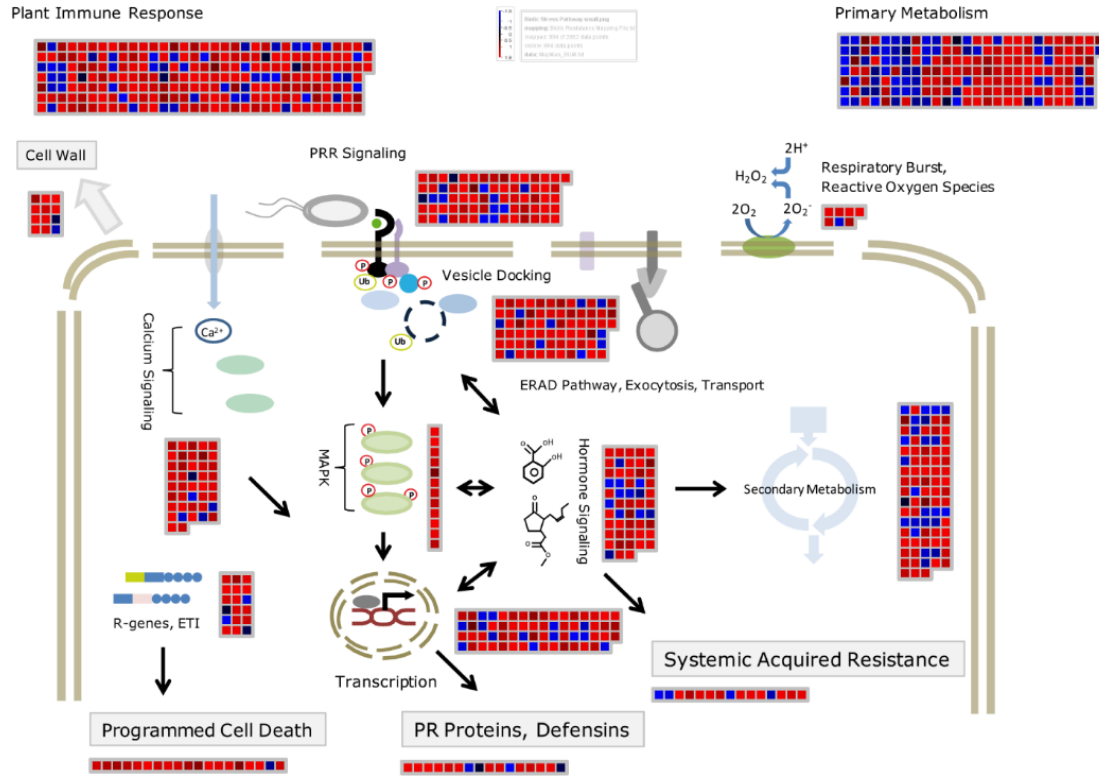

1735

1736

1737

1738

1739

1740

1741

1742

1743

1744

1745

1746

1747 Supplemental figure 14

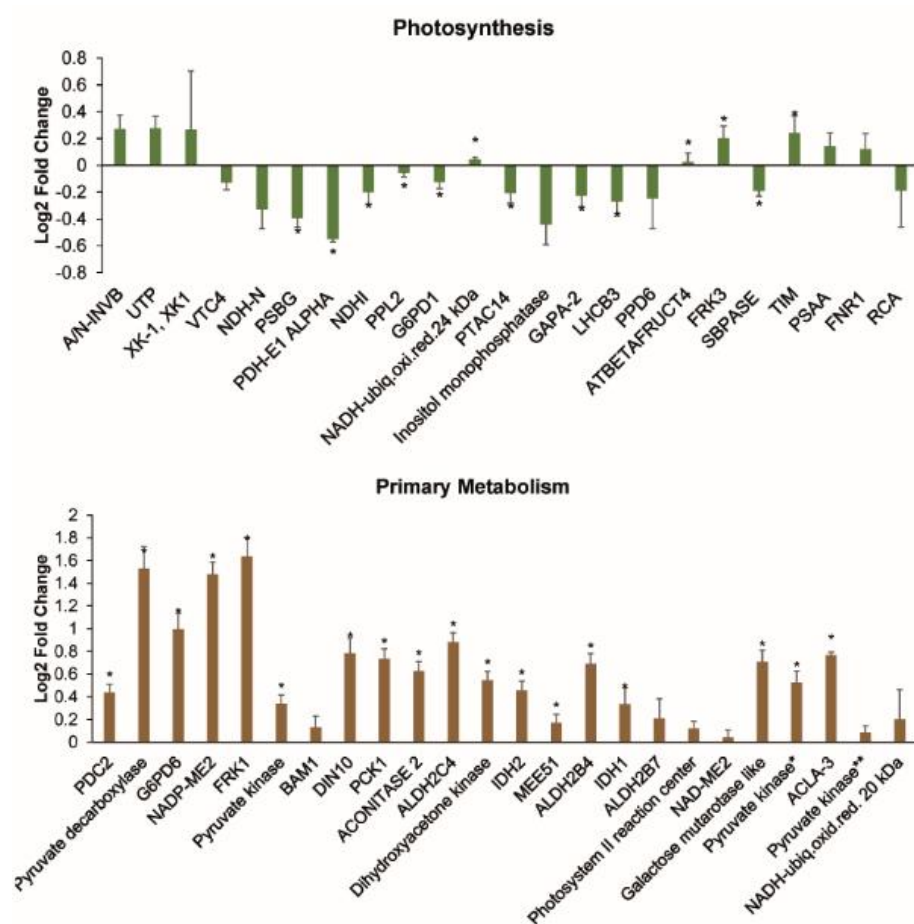

1748

1749

1750

1751

1752

1753

1754

1755

1756

1757

1758 Supplemental figure 15

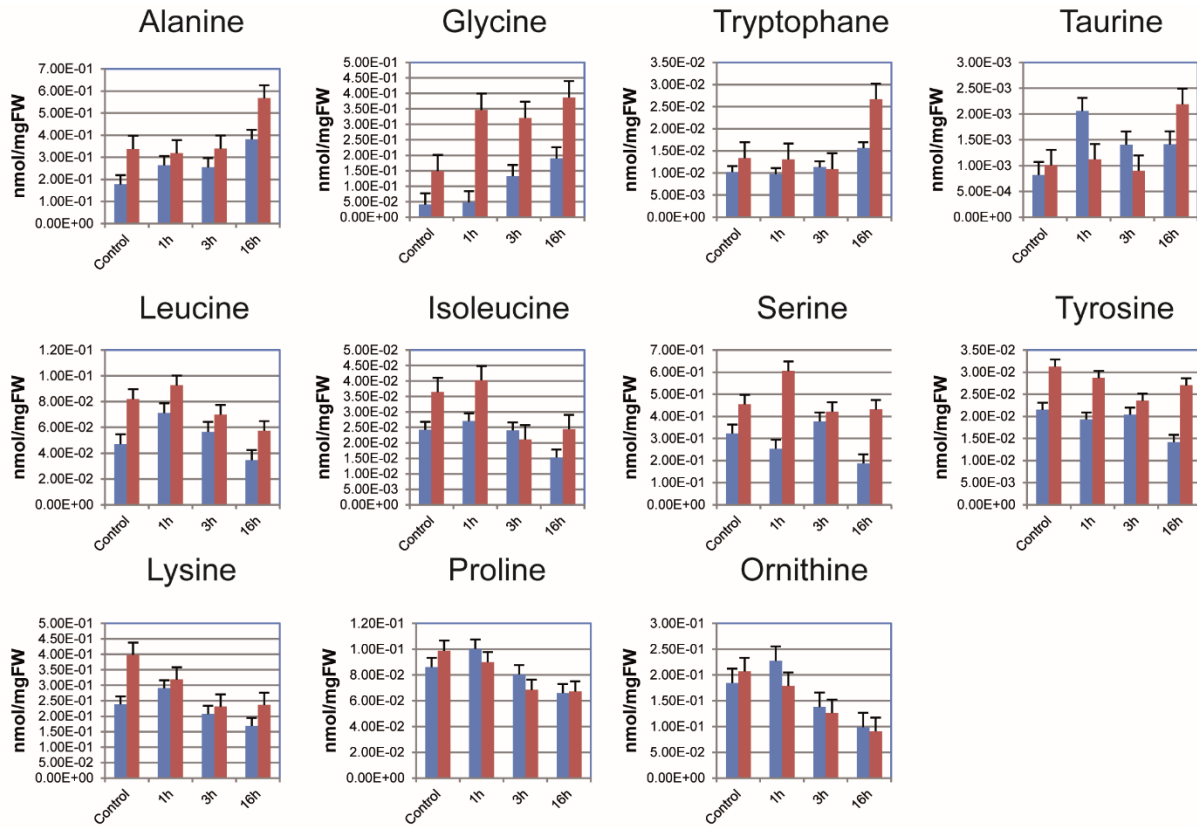

1759

1760

1761
